# Supplementary material for: Synthesis, bioactivity and 3D-QSAR of azamacrolide compounds with a carbamate or urea moiety as potential fungicides and inhibitors of quorum sensing
Source: Royal Society of Chemistry journal article supplement (doi:10.1039/d0nj05727d), 2021-01-01

## New Journal of Chemistry

### Supporting information

#### **Synthesis, bioactivity and 3D-QSAR of Azamacrolide compounds with a carbamate or urea moiety as potential fungicides and inhibitors of quorum sensing**

Lei Ning<sup>a</sup>, Simin Wang<sup>a</sup>, Lin Du<sup>b</sup>, Bingyi, Guo<sup>a</sup>, Jianjun Zhang<sup>a</sup>, Huizhe Lu<sup>a</sup>, Yanhong Dong<sup>a,\*</sup>

<sup>a</sup> *Department of Chemistry and Innovation Center of Pesticide Research, College of Science, China Agricultural University, Beijing 100193, China*

<sup>b</sup> *College of Agronomy and Biotechnology, China Agricultural University, Beijing 100193, China*

## Contents

|                                                                                            |    |
|--------------------------------------------------------------------------------------------|----|
| 1. The inhibition rate of target compounds against plant pathogens .....                   | S3 |
| 2. Antibacterial activity of test compounds against <i>Agrobacterium tumefaciens</i> ..... | S4 |
| <sup>1</sup> H NMR spectrum and <sup>13</sup> C NMR spectrum .....                         | S6 |

1. The inhibition rate of target compounds against plant pathogens

**Table S1** The inhibition rate of target compounds against plant pathogens (50 mg/L).

| Comp.         | Inhibitory rate (%) <sup>a</sup> |              |              |              |              |              |
|---------------|----------------------------------|--------------|--------------|--------------|--------------|--------------|
|               | <i>A.s.</i>                      | <i>B.c.</i>  | <i>V.m.</i>  | <i>M.k.</i>  | <i>G.z.</i>  | <i>S.s.</i>  |
| <b>D16</b>    | 39.30                            | 13.84        | 20.78        | 56.92        | 40.52        | 65.97        |
| <b>D12</b>    | 7.37                             | -1.04        | 2.92         | 11.64        | 18.59        | 19.47        |
| <b>D16-1</b>  | 26.99                            | 10.42        | 6.51         | -9.74        | 3.32         | 61.95        |
| <b>D16-2</b>  | 33.33                            | 12.80        | 10.71        | 15.41        | 27.88        | 76.70        |
| <b>D16-3</b>  | 30.18                            | 11.76        | 12.01        | 12.89        | 29.00        | 77.58        |
| <b>D16-4</b>  | 38.34                            | 15.10        | 7.19         | -13.64       | 19.19        | <b>95.58</b> |
| <b>D16-5</b>  | 19.30                            | 0.69         | 12.34        | 8.81         | 26.39        | 84.66        |
| <b>D16-6</b>  | 28.00                            | 19.08        | 2.93         | 25.13        | 28.14        | 84.66        |
| <b>D16-7</b>  | 18.10                            | 1.82         | 5.48         | -1.30        | -5.54        | 89.97        |
| <b>D16-8</b>  | 12.88                            | 9.64         | 4.79         | 21.75        | -12.18       | 87.61        |
| <b>D16-9</b>  | 29.14                            | 8.07         | 11.30        | 24.35        | -25.46       | 84.37        |
| <b>D16-10</b> | 14.39                            | 8.65         | 10.71        | 4.09         | 17.47        | <b>90.86</b> |
| <b>D16-11</b> | 18.25                            | 4.50         | 7.79         | 4.72         | 18.22        | 81.42        |
| <b>D16-12</b> | 20.35                            | 1.38         | 9.74         | 3.14         | 28.25        | 67.26        |
| <b>D16-13</b> | 24.54                            | 35.94        | 15.75        | 20.13        | 9.23         | 51.33        |
| <b>D16-14</b> | 47.02                            | 46.02        | 21.75        | 41.82        | 40.89        | <b>94.10</b> |
| <b>D16-15</b> | 49.12                            | 37.72        | 32.14        | 47.48        | 42.38        | 77.86        |
| <b>D16-16</b> | 34.05                            | 28.39        | 9.59         | 5.84         | -2.21        | <b>92.63</b> |
| <b>D16-17</b> | 40.18                            | 44.27        | 24.66        | 46.43        | 7.01         | <b>97.35</b> |
| <b>D16-18</b> | 48.50                            | 58.88        | 22.93        | 72.02        | 45.02        | <b>96.17</b> |
| <b>D16-19</b> | <b>96.32</b>                     | 41.67        | <b>95.89</b> | <b>96.10</b> | <b>95.57</b> | 60.47        |
| <b>D16-20</b> | 48.42                            | 6.92         | 18.51        | 22.96        | 42.75        | 84.07        |
| <b>D16-21</b> | 13.68                            | 14.88        | 20.13        | 22.64        | 8.55         | 75.81        |
| <b>D12-1</b>  | 56.50                            | 41.78        | 24.39        | 82.12        | 58.44        | 53.99        |
| <b>D12-2</b>  | 49.82                            | 18.34        | 49.35        | 47.48        | 44.61        | 66.03        |
| <b>D12-3</b>  | 21.40                            | 32.53        | 12.01        | 26.73        | 28.25        | 32.44        |
| <b>D12-4</b>  | 50.50                            | 43.09        | 33.66        | 60.62        | 37.66        | 70.29        |
| <b>D12-5</b>  | 44.56                            | 14.19        | 27.27        | 49.37        | 45.72        | 59.54        |
| <b>D12-6</b>  | 38.00                            | 38.49        | 27.80        | 51.55        | 48.05        | 62.32        |
| <b>D12-7</b>  | 43.50                            | 35.20        | 19.51        | 48.70        | 47.19        | 67.75        |
| <b>D12-8</b>  | 51.50                            | 23.03        | 21.46        | 55.96        | 50.65        | 53.62        |
| <b>D12-9</b>  | 61.00                            | 41.78        | 33.17        | <b>91.97</b> | 55.41        | 53.99        |
| <b>D12-10</b> | 13.68                            | <b>95.85</b> | 20.13        | <b>96.23</b> | 8.55         | 52.78        |
| <b>D12-11</b> | -1.05                            | -1.73        | 6.49         | 14.15        | -7.06        | 33.97        |
| <b>D12-12</b> | 33.68                            | 36.68        | 20.78        | <b>93.08</b> | 49.44        | 41.98        |
| <b>D12-13</b> | 67.02                            | 56.06        | 47.40        | 76.10        | 64.31        | 66.67        |

|                    |        |        |        |        |        |        |
|--------------------|--------|--------|--------|--------|--------|--------|
| <b>D12-14</b>      | 31.36  | 22.36  | 16.29  | 41.84  | -8.70  | 65.97  |
| <b>D12-15</b>      | 29.27  | 12.46  | 22.04  | 36.39  | 13.04  | 79.83  |
| <b>D12-16</b>      | 47.00  | 44.08  | 23.41  | 69.17  | 34.63  | 45.29  |
| <b>D12-17</b>      | 18.25  | -2.77  | 8.44   | 66.67  | 34.57  | 29.17  |
| <b>D12-18</b>      | 56.00  | 43.09  | 30.24  | 58.29  | 52.81  | 80.43  |
| <b>fludioxonil</b> | 100.00 | 100.00 |        | 100.00 | 100.00 | 100.00 |
| <b>carbendazim</b> |        | 100.00 | 100.00 | 100.00 | 100.00 |        |

<sup>a</sup> A.s., *Alternaria solani*; B.c., *Botrytis cinerea*; V.m., *Valsa mali*; G.z., *Gibberella zeae*; S.s., *Sclerotinia sclerotiorum*. All values are the mean of three replicates.

## 2. Antibacterial activity of test compounds against *Agrobacterium tumefaciens*

**Table S2** Antibacterial activity of test compounds at different concentrations against *Agrobacterium tumefaciens in vitro*

| Compound      | OD <sub>600</sub> value |          |         |         |
|---------------|-------------------------|----------|---------|---------|
|               | 200 mg/L                | 100 mg/L | 50 mg/L | 25 mg/L |
| <b>D16-1</b>  | 0.373                   | 0.768    | 0.794   | 0.809   |
| <b>D16-2</b>  | 0.334                   | 0.728    | 0.786   | 0.830   |
| <b>D16-3</b>  | 0.356                   | 0.754    | 0.808   | 0.822   |
| <b>D16-4</b>  | 0.355                   | 0.799    | 0.817   | 0.833   |
| <b>D16-5</b>  | 0.387                   | 0.713    | 0.792   | 0.797   |
| <b>D16-6</b>  | 0.379                   | 0.742    | 0.819   | 0.802   |
| <b>D16-7</b>  | 0.410                   | 0.772    | 0.791   | 0.789   |
| <b>D16-8</b>  | 0.422                   | 0.793    | 0.789   | 0.811   |
| <b>D16-9</b>  | 0.398                   | 0.791    | 0.779   | 0.816   |
| <b>D16-10</b> | 0.349                   | 0.804    | 0.824   | 0.822   |
| <b>D16-11</b> | 0.375                   | 0.741    | 0.805   | 0.814   |
| <b>D16-12</b> | 0.421                   | 0.784    | 0.812   | 0.799   |
| <b>D16-13</b> | 0.376                   | 0.758    | 0.806   | 0.823   |
| <b>D16-14</b> | 0.386                   | 0.768    | 0.809   | 0.822   |
| <b>D16-15</b> | 0.398                   | 0.726    | 0.796   | 0.818   |
| <b>D16-16</b> | 0.457                   | 0.776    | 0.825   | 0.826   |
| <b>D16-17</b> | 0.379                   | 0.809    | 0.810   | 0.827   |
| <b>D16-18</b> | 0.418                   | 0.795    | 0.796   | 0.816   |
| <b>D16-19</b> | 0.465                   | 0.765    | 0.807   | 0.814   |
| <b>D16-20</b> | 0.490                   | 0.818    | 0.810   | 0.827   |
| <b>D16-21</b> | 0.348                   | 0.770    | 0.829   | 0.810   |
| <b>D12-1</b>  | 0.403                   | 0.772    | 0.786   | 0.829   |
| <b>D12-2</b>  | 0.384                   | 0.787    | 0.823   | 0.815   |
| <b>D12-3</b>  | 0.377                   | 0.731    | 0.809   | 0.821   |
| <b>D12-4</b>  | 0.423                   | 0.739    | 0.811   | 0.828   |
| <b>D12-5</b>  | 0.394                   | 0.741    | 0.788   | 0.819   |

---

|               |       |       |       |       |
|---------------|-------|-------|-------|-------|
| <b>D12-6</b>  | 0.363 | 0.743 | 0.806 | 0.807 |
| <b>D12-7</b>  | 0.442 | 0.766 | 0.817 | 0.811 |
| <b>D12-8</b>  | 0.485 | 0.715 | 0.801 | 0.831 |
| <b>D12-9</b>  | 0.469 | 0.736 | 0.808 | 0.825 |
| <b>D12-10</b> | 0.482 | 0.745 | 0.798 | 0.818 |
| <b>D12-11</b> | 0.383 | 0.747 | 0.793 | 0.813 |
| <b>D12-12</b> | 0.455 | 0.702 | 0.819 | 0.810 |
| <b>D12-13</b> | 0.384 | 0.746 | 0.811 | 0.828 |
| <b>D12-14</b> | 0.331 | 0.793 | 0.802 | 0.816 |
| <b>D12-15</b> | 0.301 | 0.768 | 0.813 | 0.826 |
| <b>D12-16</b> | 0.487 | 0.768 | 0.787 | 0.817 |
| <b>D12-17</b> | 0.373 | 0.776 | 0.789 | 0.807 |
| <b>D12-18</b> | 0.369 | 0.719 | 0.818 | 0.829 |
| Blank control |       |       | 0.780 |       |
| DMSO          |       |       | 0.765 |       |

---

$^1\text{H}$  NMR spectrum and  $^{13}\text{C}$  NMR spectrum

$^1\text{H}$  NMR spectrum of D12 (300 MHz,  $\text{CDCl}_3$ )

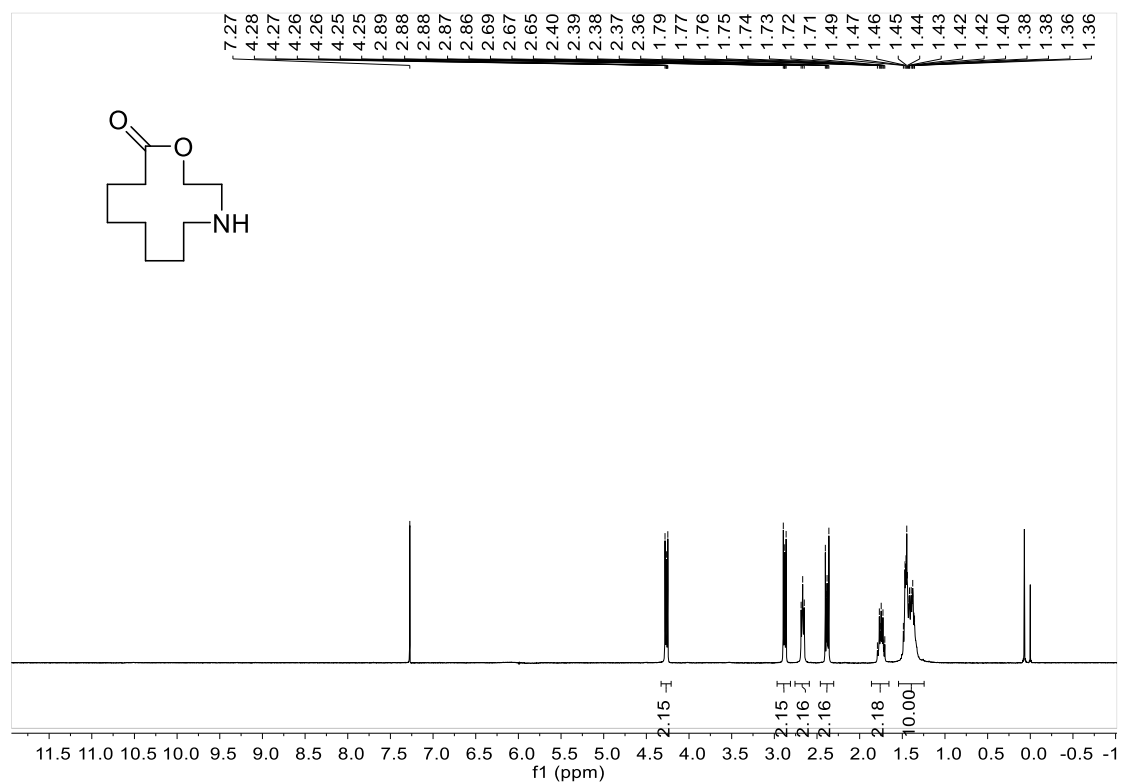

$^{13}\text{C}$  NMR spectrum of D12 (75 MHz,  $\text{CDCl}_3$ )

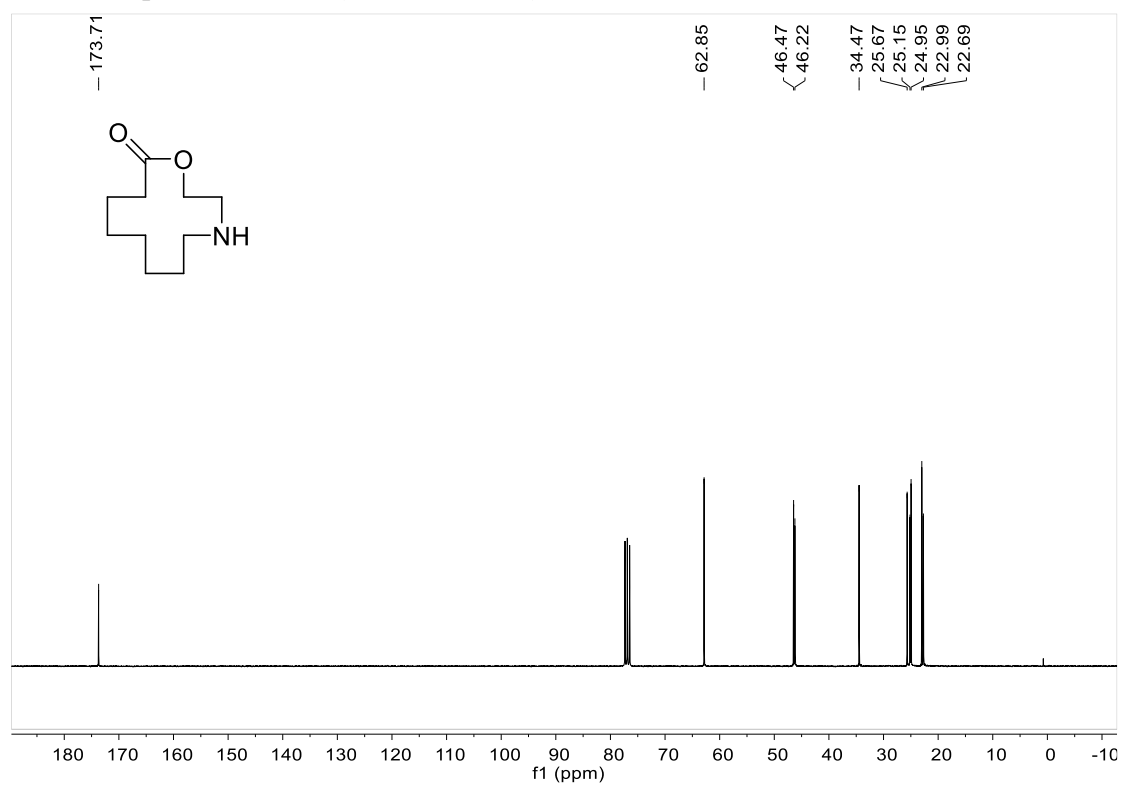

**<sup>1</sup>H NMR spectrum of D16-XL (300 MHz, CDCl<sub>3</sub>)**

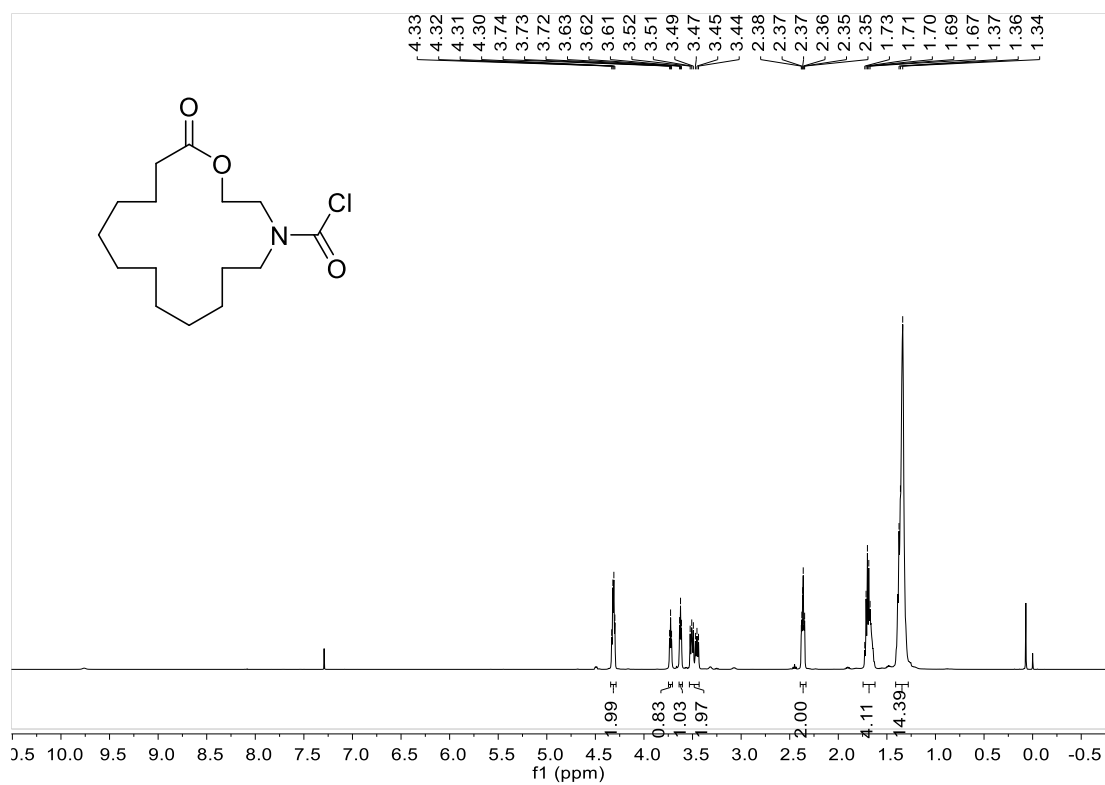

**<sup>13</sup>C NMR spectrum of D16-XL (75 MHz, CDCl<sub>3</sub>)**

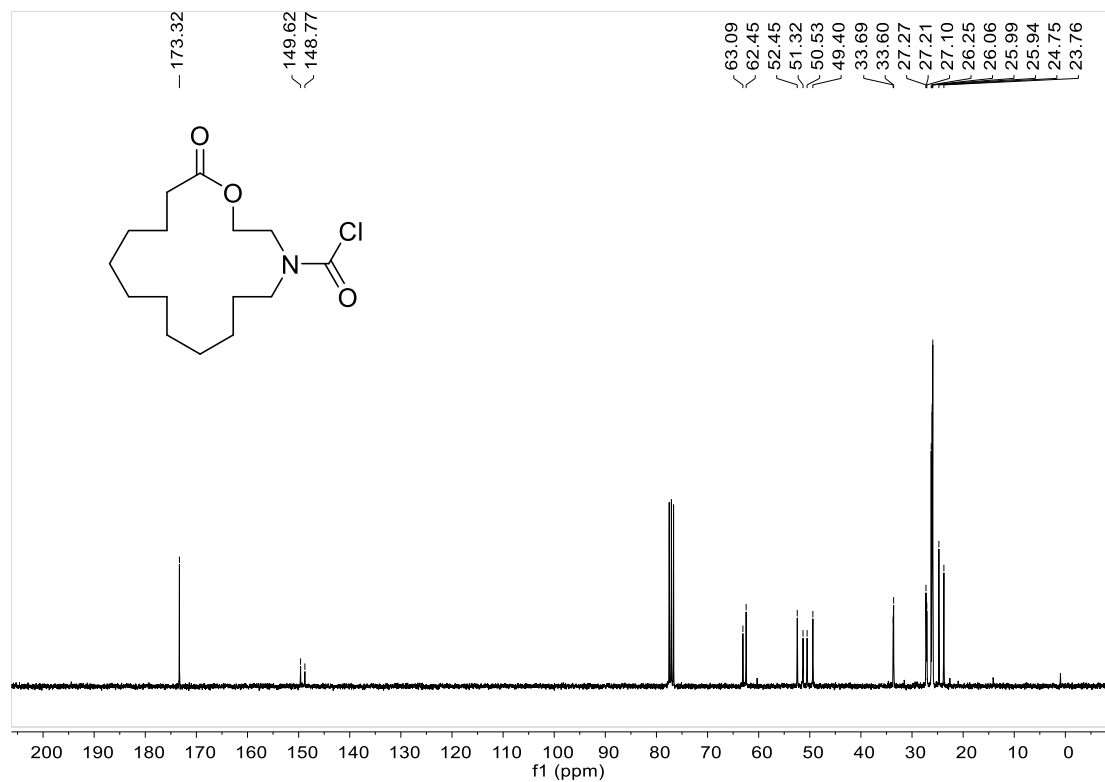

**<sup>1</sup>H NMR spectrum of D12-XL (300 MHz, CDCl<sub>3</sub>)**

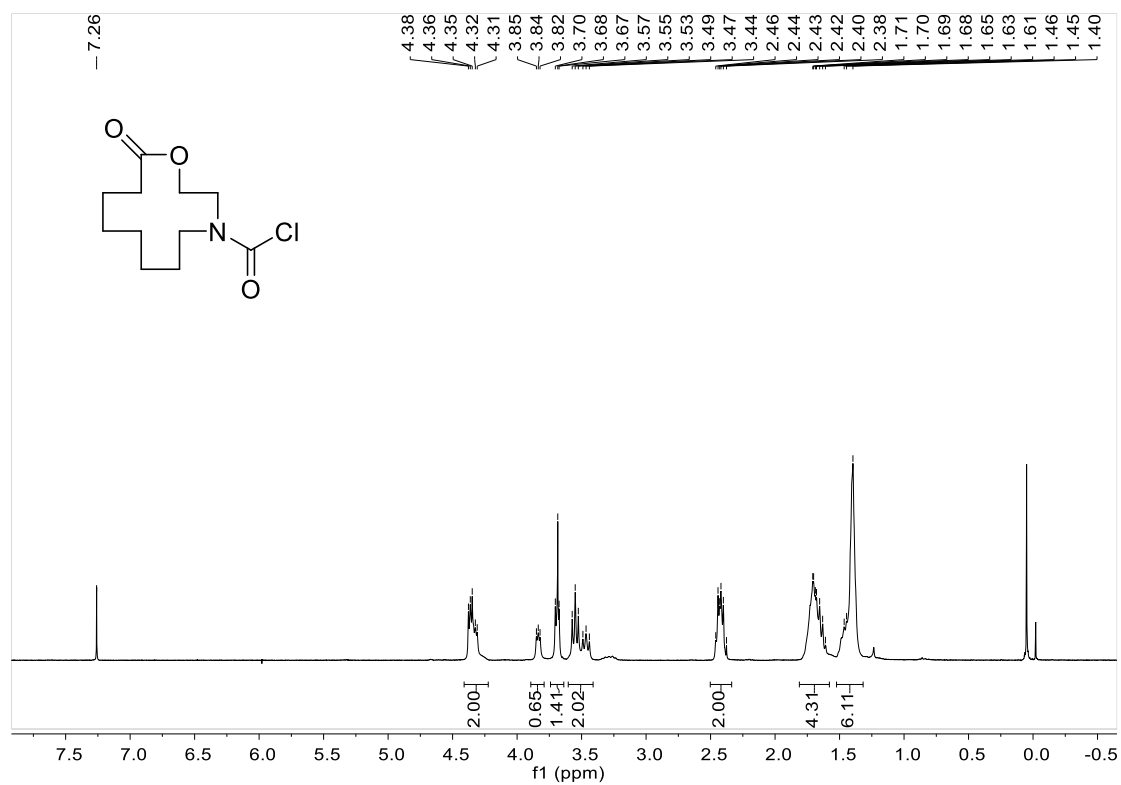

**<sup>13</sup>C NMR spectrum of D12-XL (75 MHz, CDCl<sub>3</sub>)**

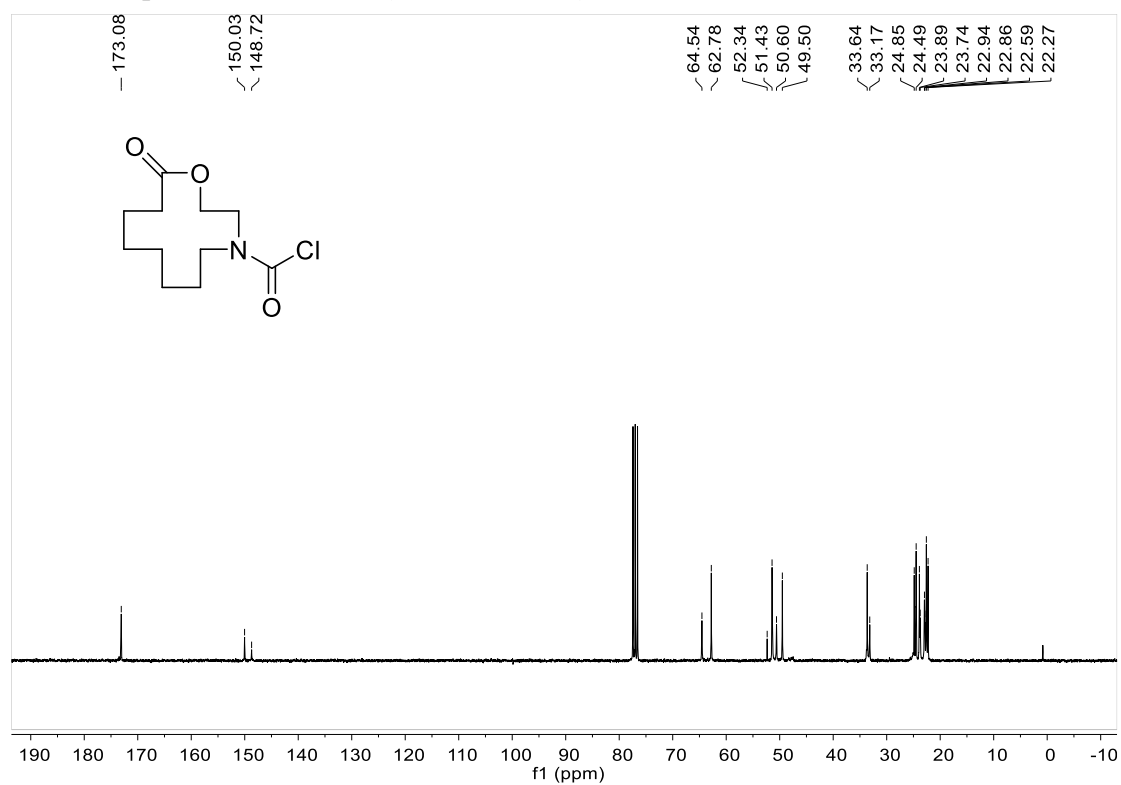



**<sup>1</sup>H NMR spectrum of D12-1 (300 MHz, CDCl<sub>3</sub>)**

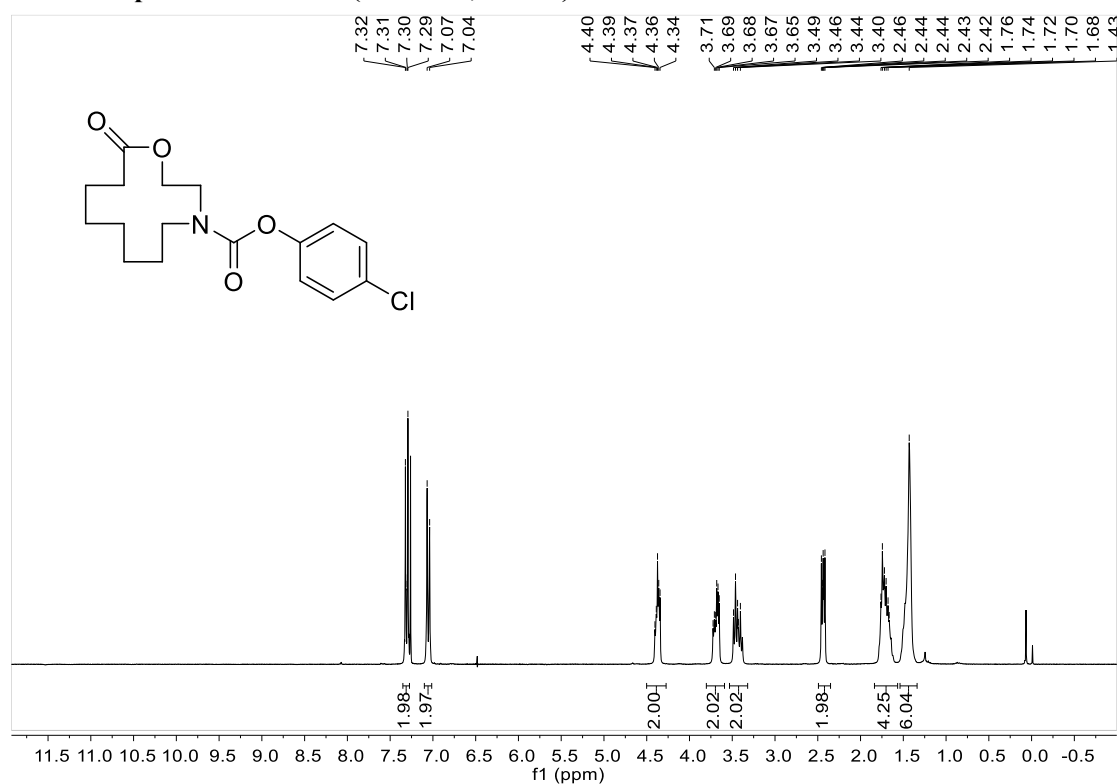

**<sup>13</sup>C NMR spectrum of D12-1 (75 MHz, CDCl<sub>3</sub>)**

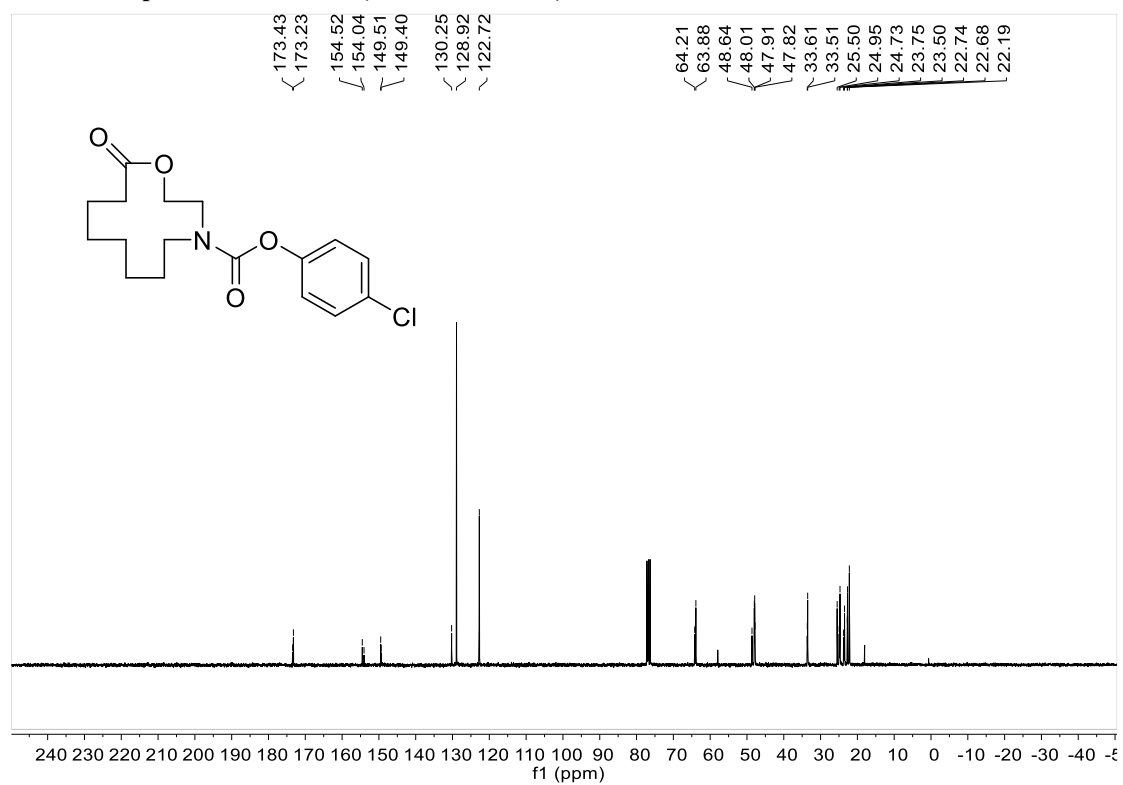

**<sup>1</sup>H NMR spectrum of D12-2 (300 MHz, CDCl<sub>3</sub>)**

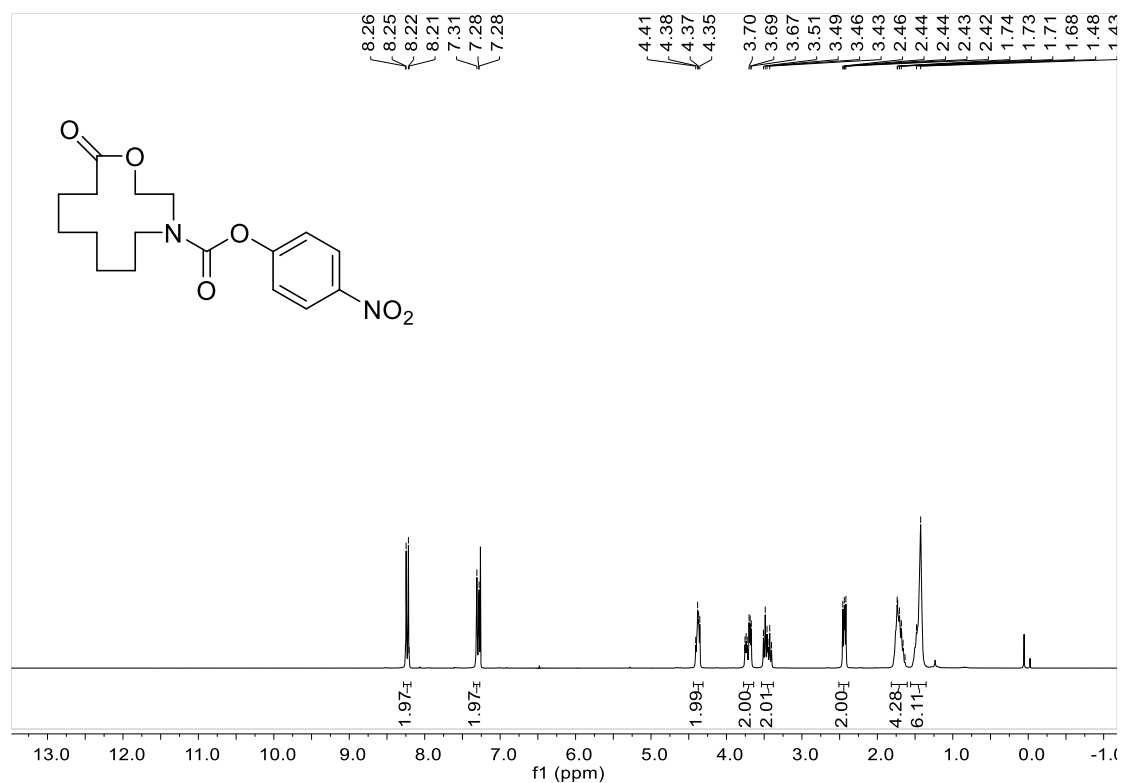

**<sup>13</sup>C NMR spectrum of D12-2 (75 MHz, CDCl<sub>3</sub>)**

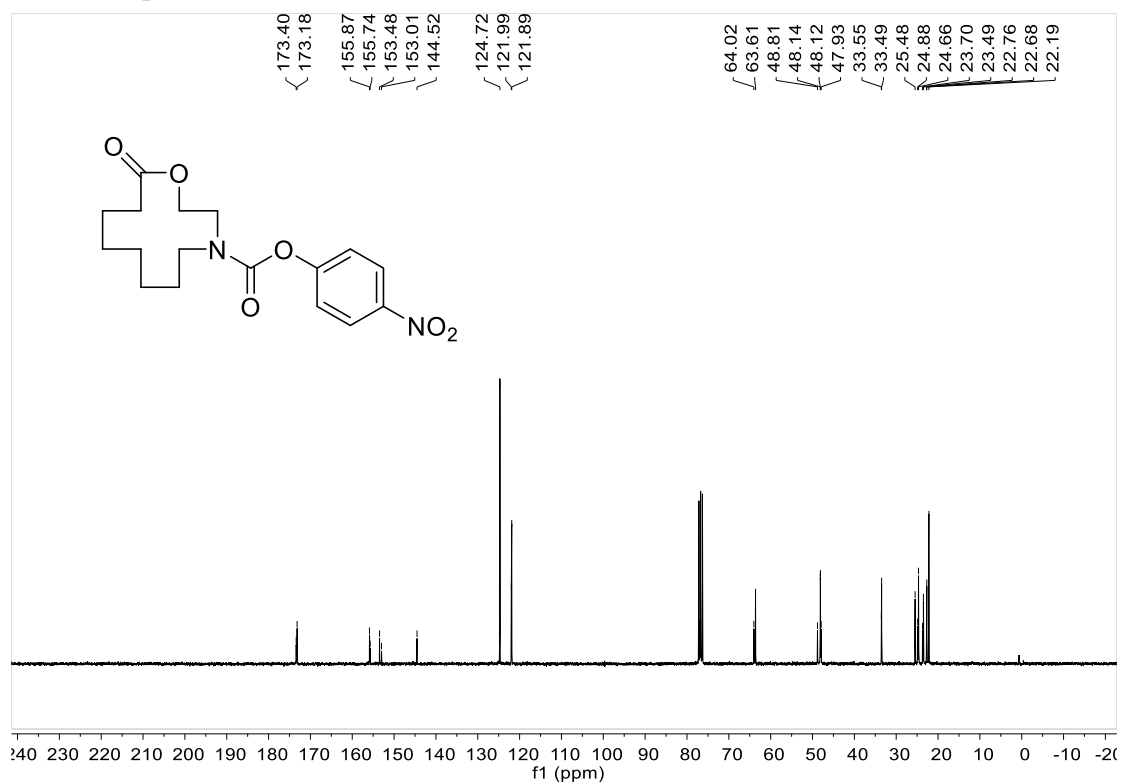

**<sup>1</sup>H NMR spectrum of D12-3 (300 MHz, CDCl<sub>3</sub>)**

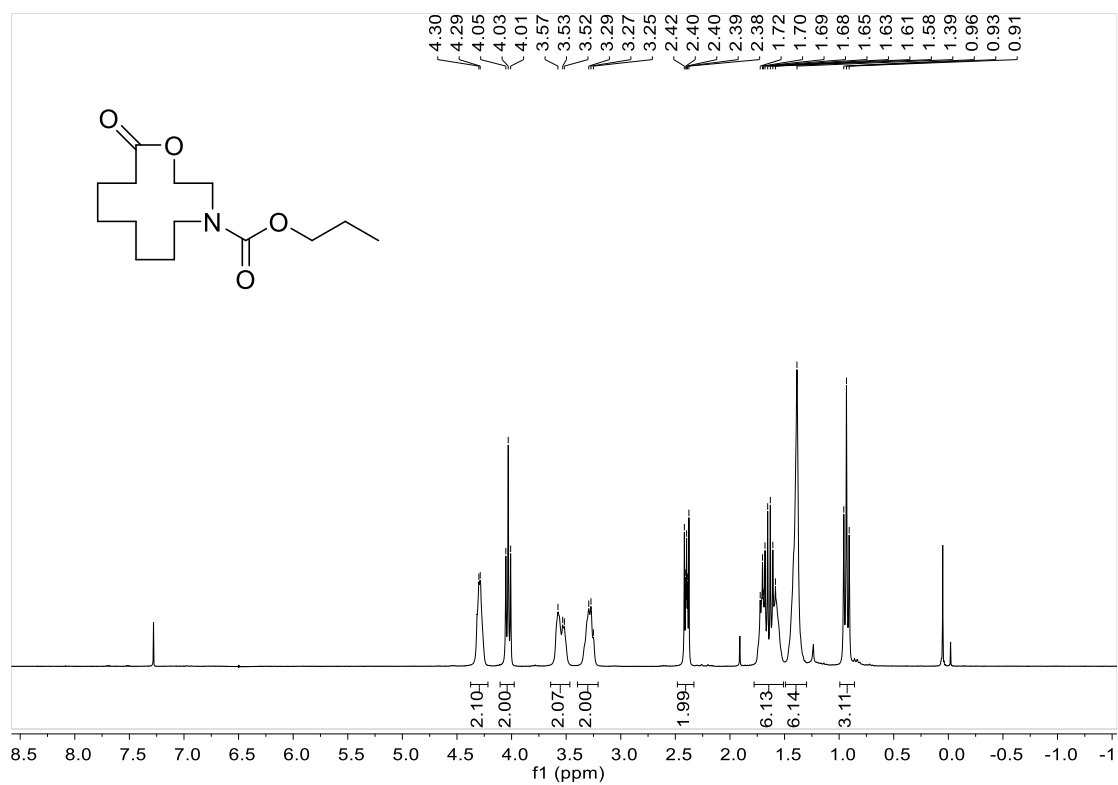

**<sup>13</sup>C NMR spectrum of D12-3 (75 MHz, CDCl<sub>3</sub>)**

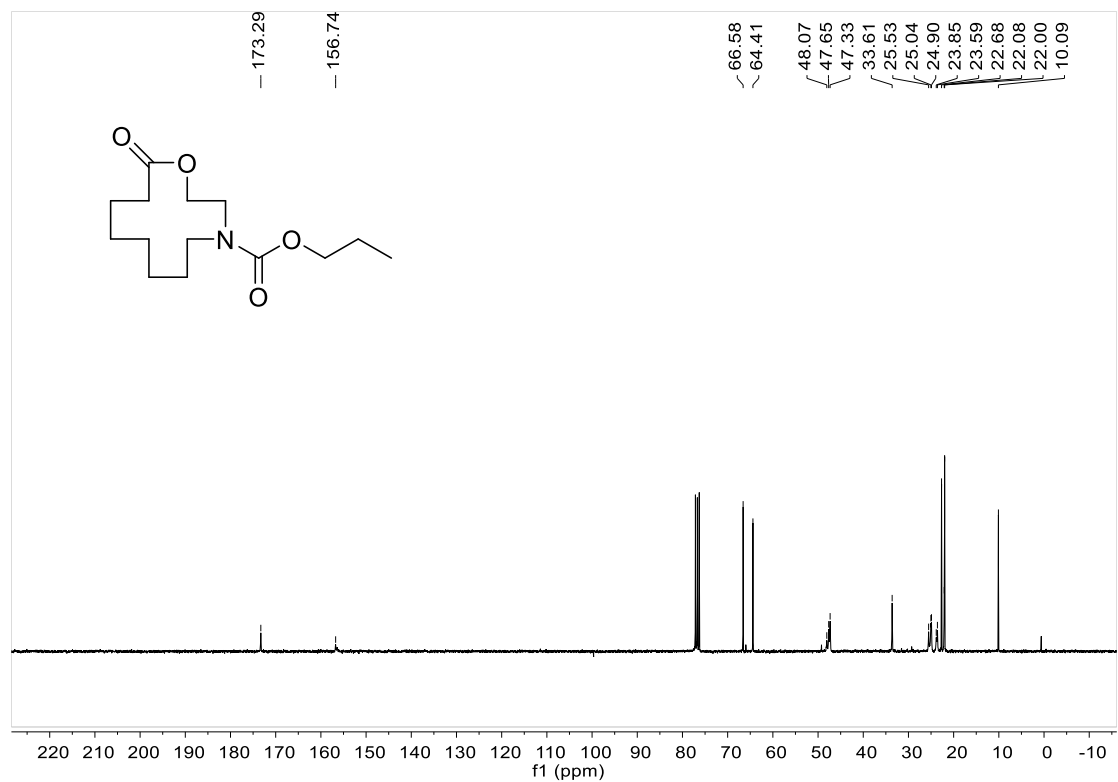

**<sup>1</sup>H NMR spectrum of D12-4 (300 MHz, CDCl<sub>3</sub>)**

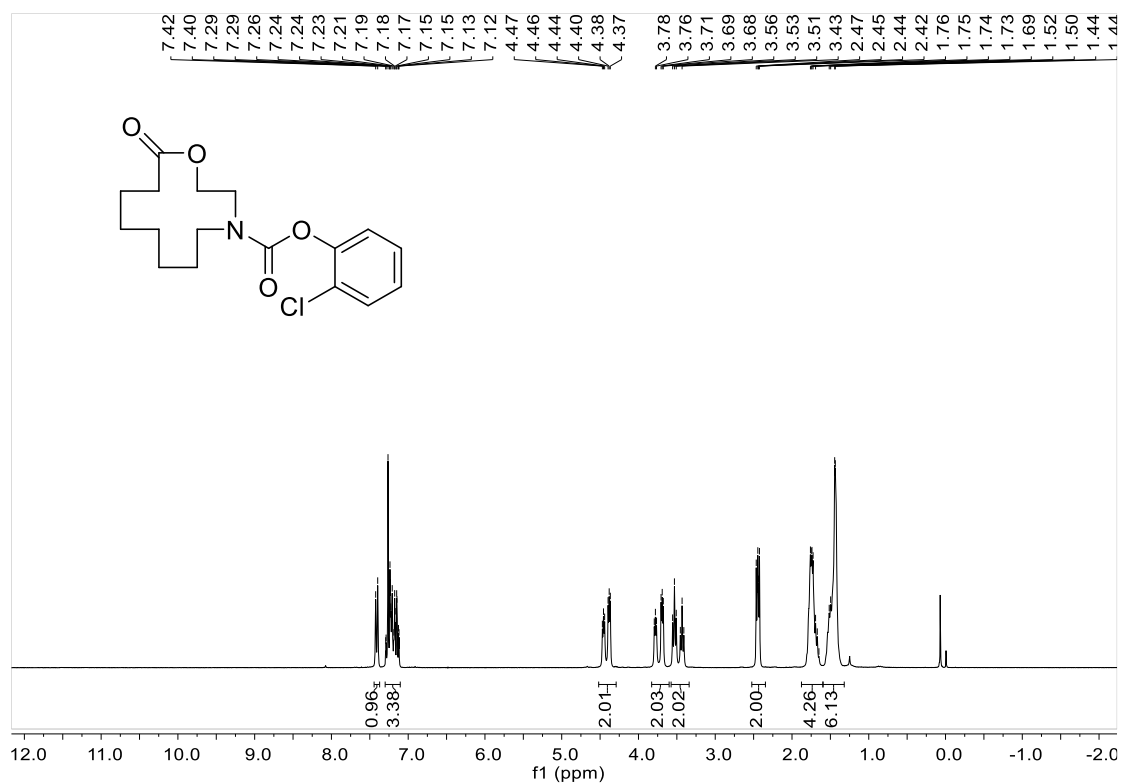

**<sup>13</sup>C NMR spectrum of D12-4 (75 MHz, CDCl<sub>3</sub>)**

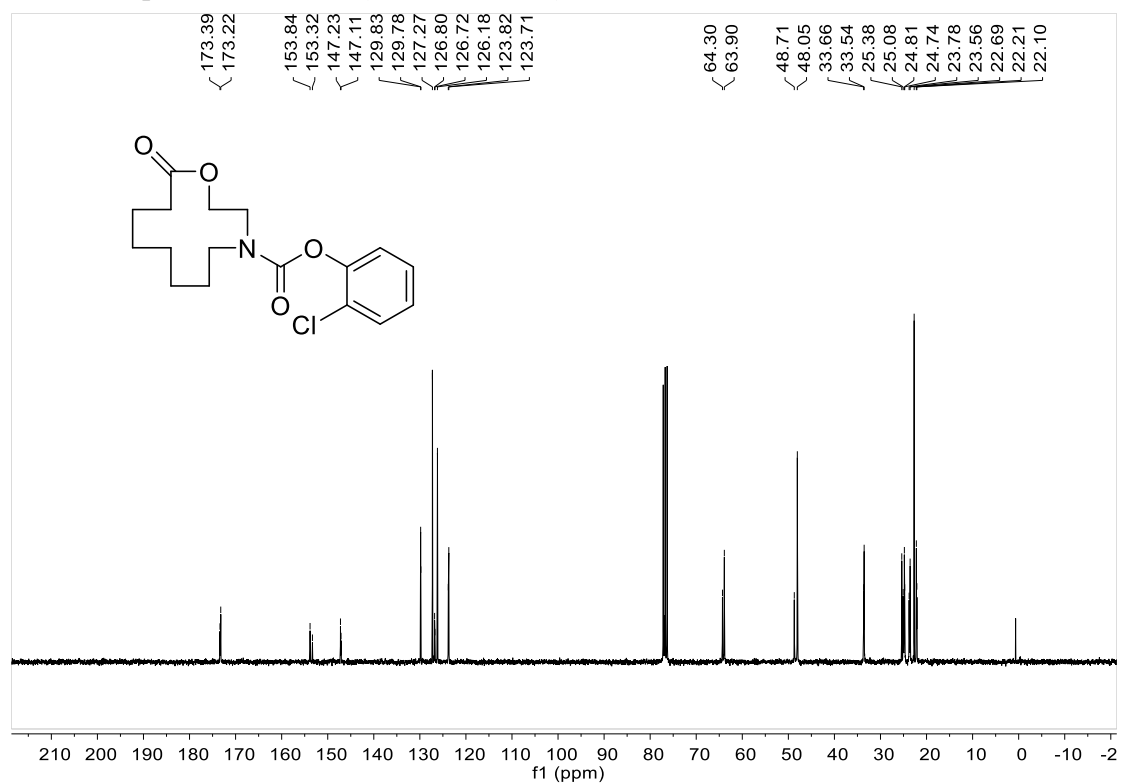

**<sup>1</sup>H NMR spectrum of D12-5 (300 MHz, CDCl<sub>3</sub>)**

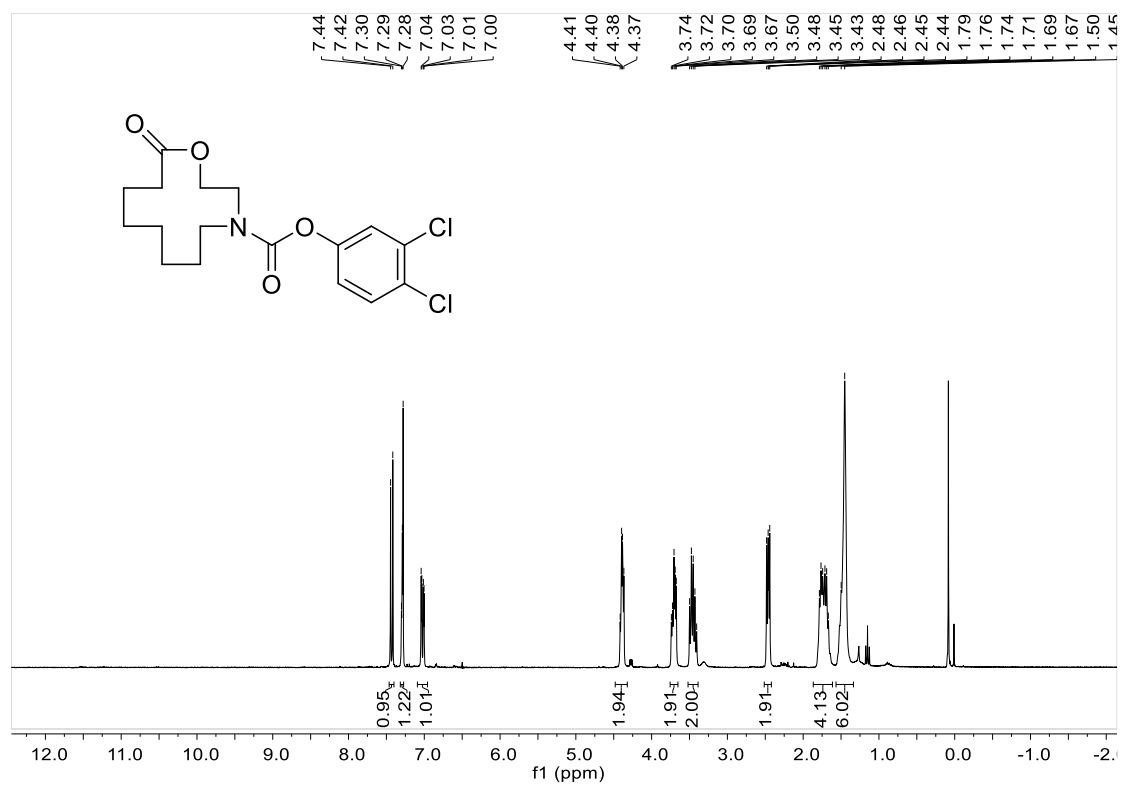

**<sup>13</sup>C NMR spectrum of D12-5 (75 MHz, CDCl<sub>3</sub>)**

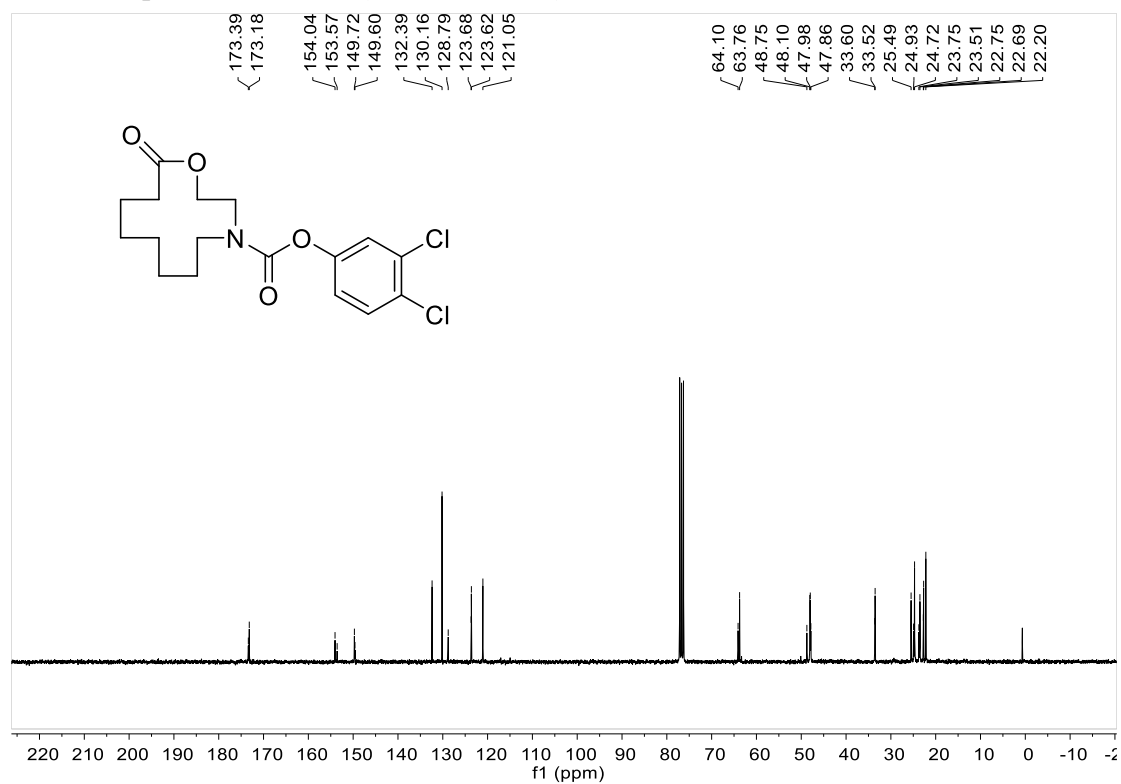

**<sup>1</sup>H NMR spectrum of D12-6 (300 MHz, CDCl<sub>3</sub>)**

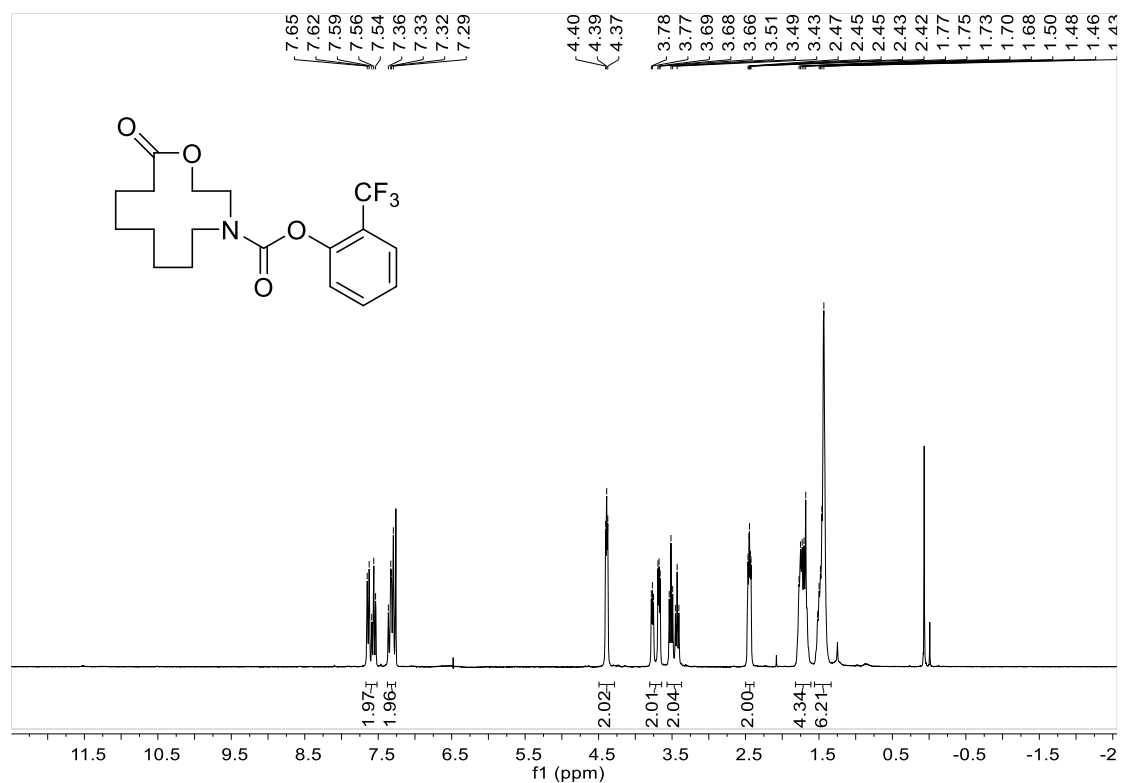

**<sup>13</sup>C NMR spectrum of D12-6 (75 MHz, CDCl<sub>3</sub>)**

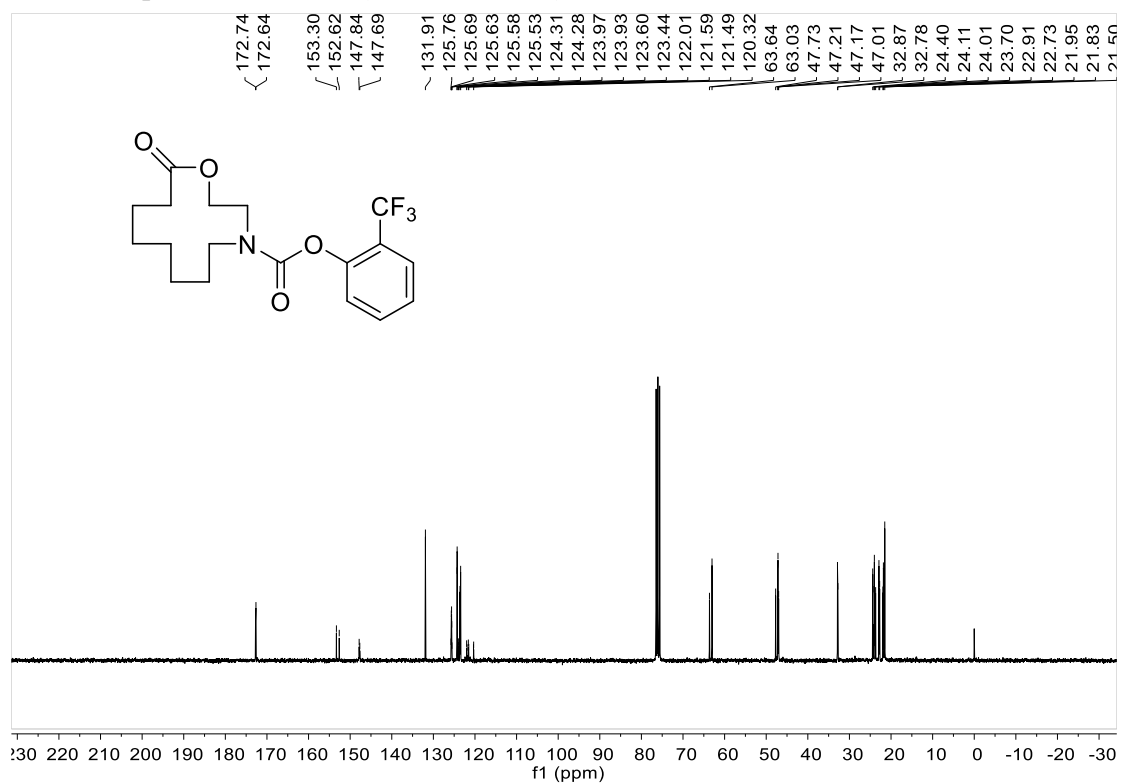

**<sup>1</sup>H NMR spectrum of D12-7 (300 MHz, CDCl<sub>3</sub>)**

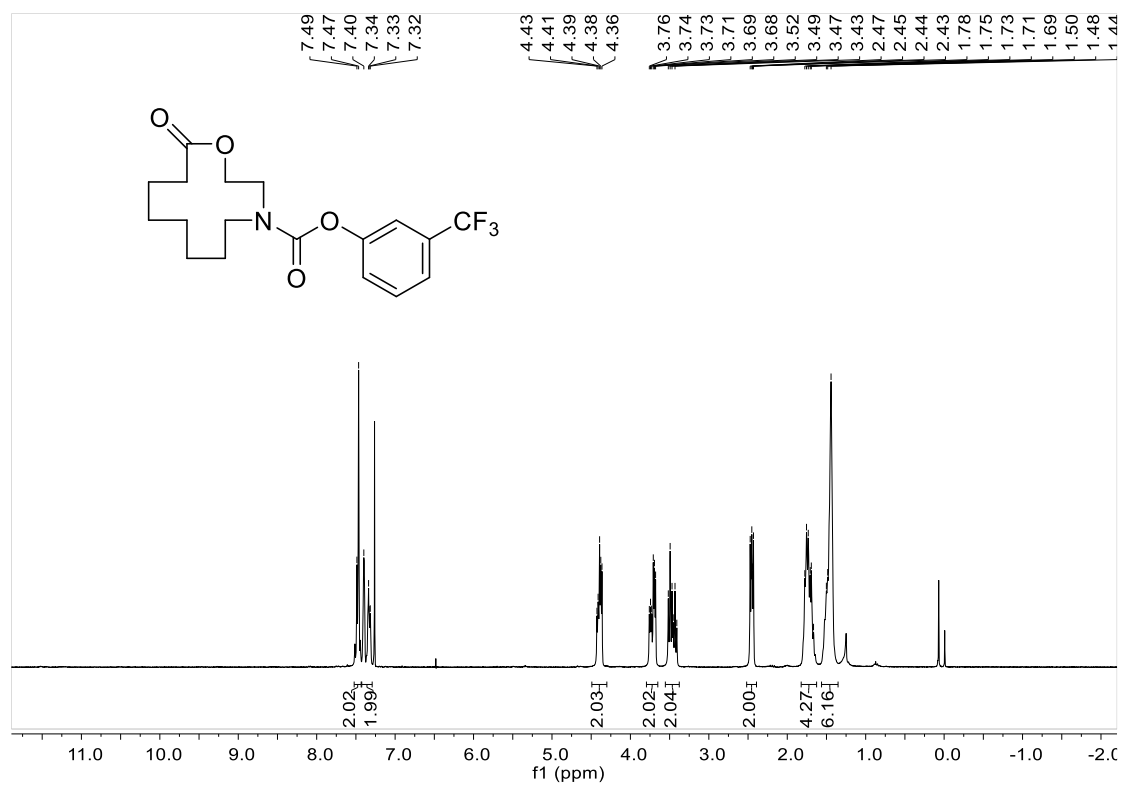

**<sup>13</sup>C NMR spectrum of D12-7 (75 MHz, CDCl<sub>3</sub>)**

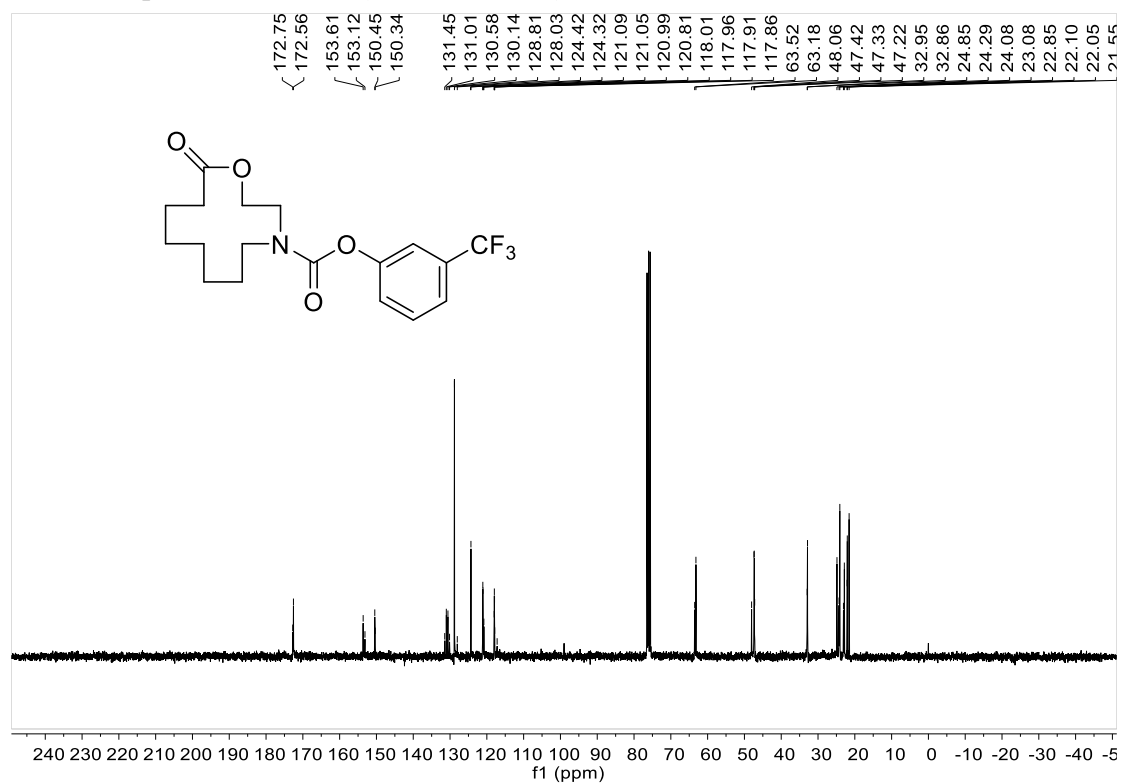

**<sup>1</sup>H NMR spectrum of D12-8 (300 MHz, CDCl<sub>3</sub>)**

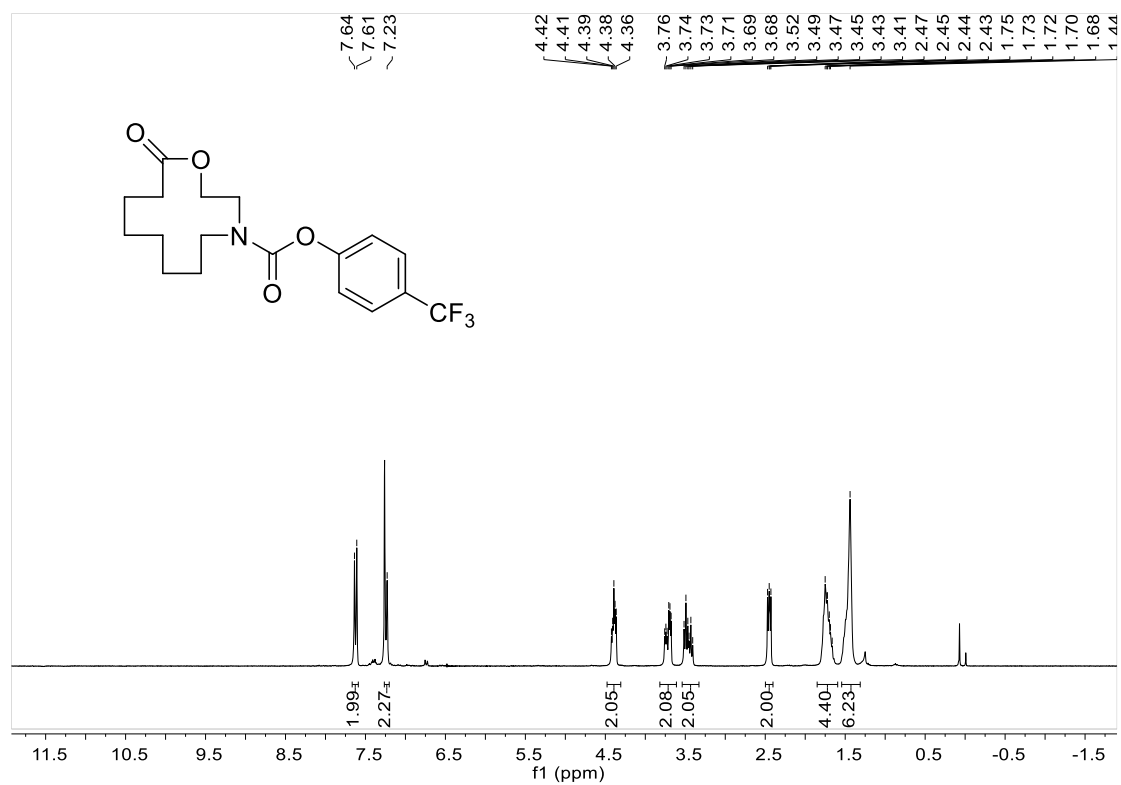

**<sup>13</sup>C NMR spectrum of D12-8 (75 MHz, CDCl<sub>3</sub>)**

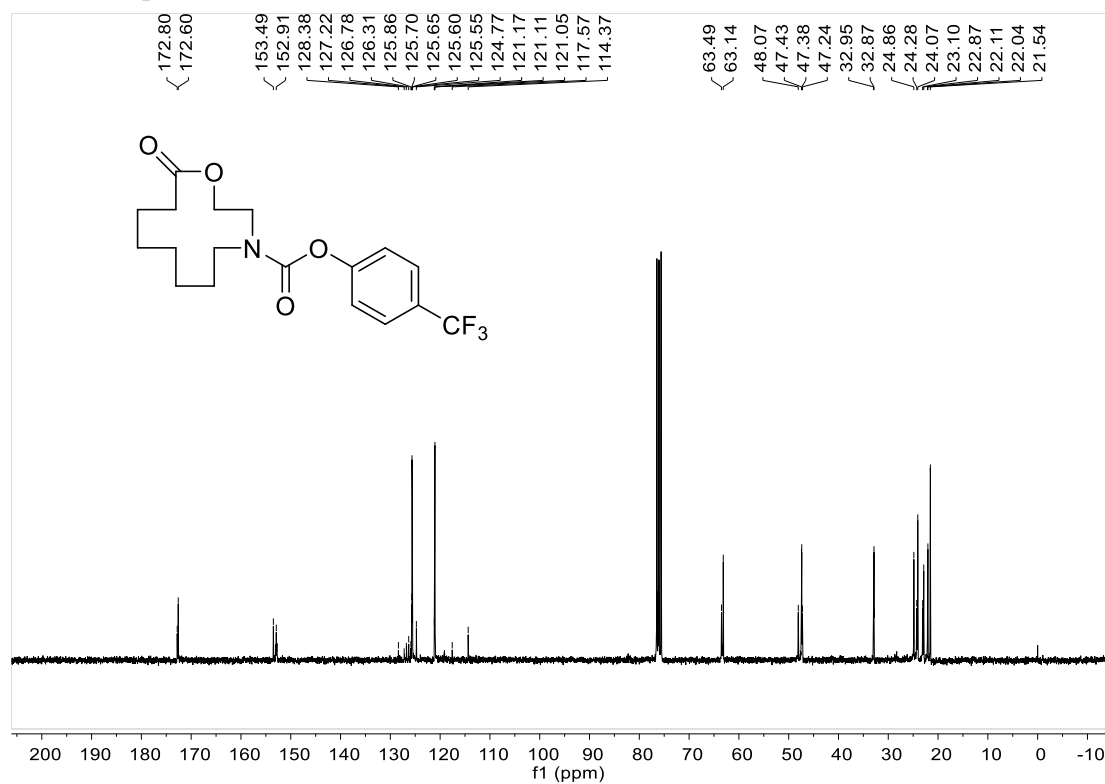



**<sup>1</sup>H NMR spectrum of D12-9 (300 MHz, CDCl<sub>3</sub>)**

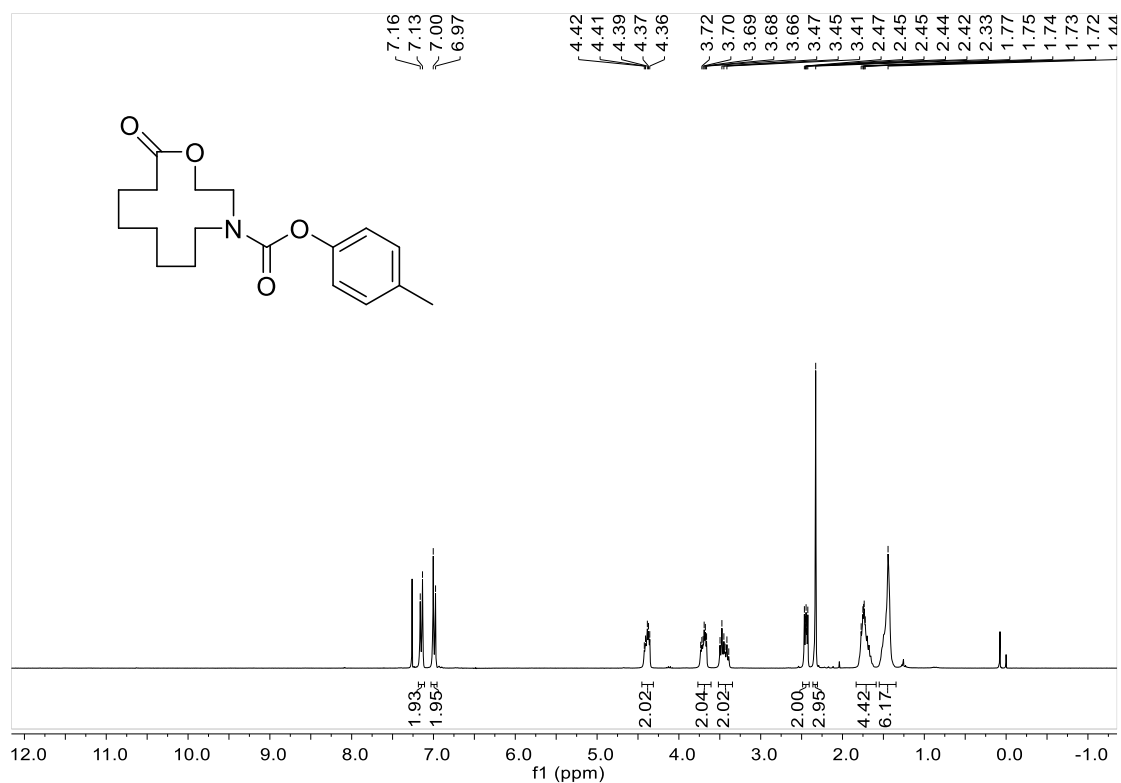

**<sup>13</sup>C NMR spectrum of D12-9 (75 MHz, CDCl<sub>3</sub>)**

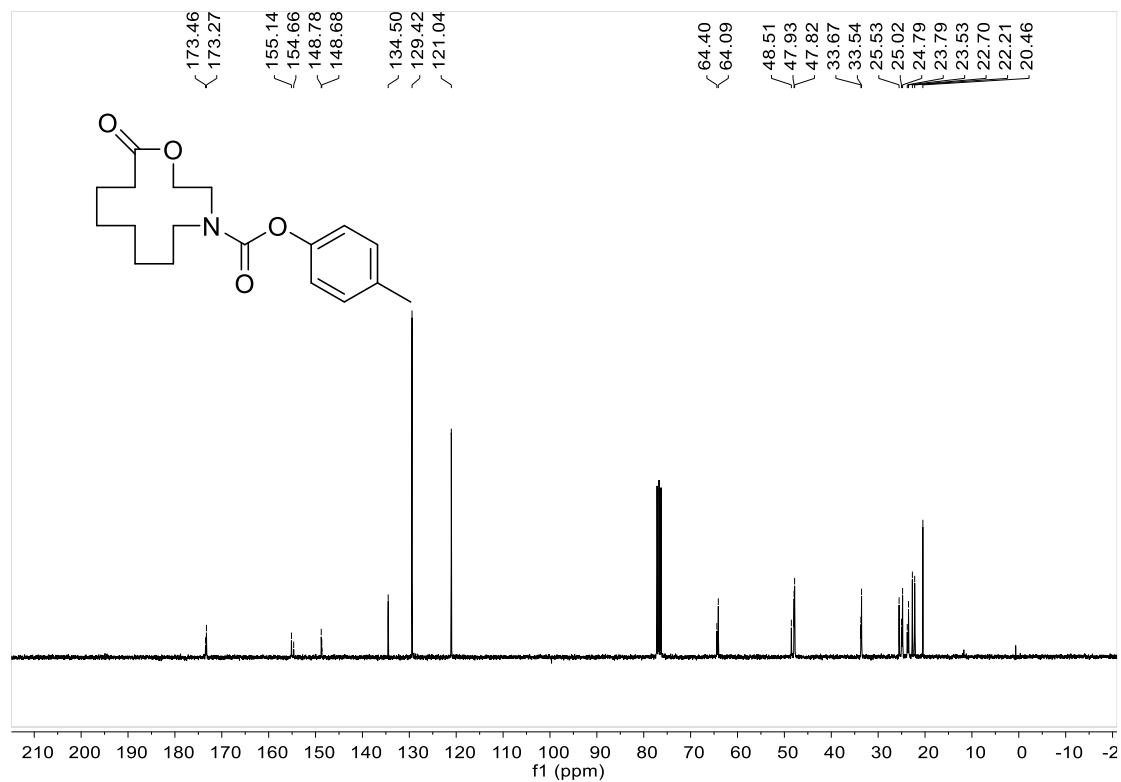

**<sup>1</sup>H NMR spectrum of D12-10 (300 MHz, CDCl<sub>3</sub>)**

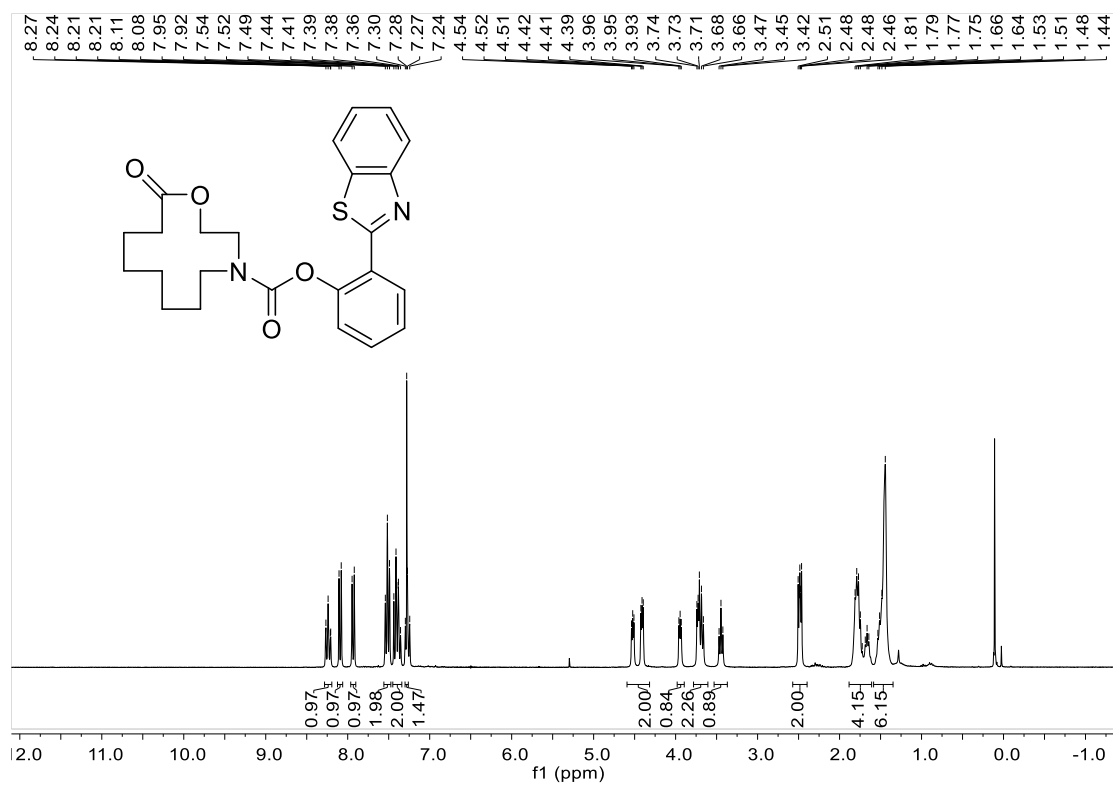

**<sup>13</sup>C NMR spectrum of D12-10 (75 MHz, CDCl<sub>3</sub>)**

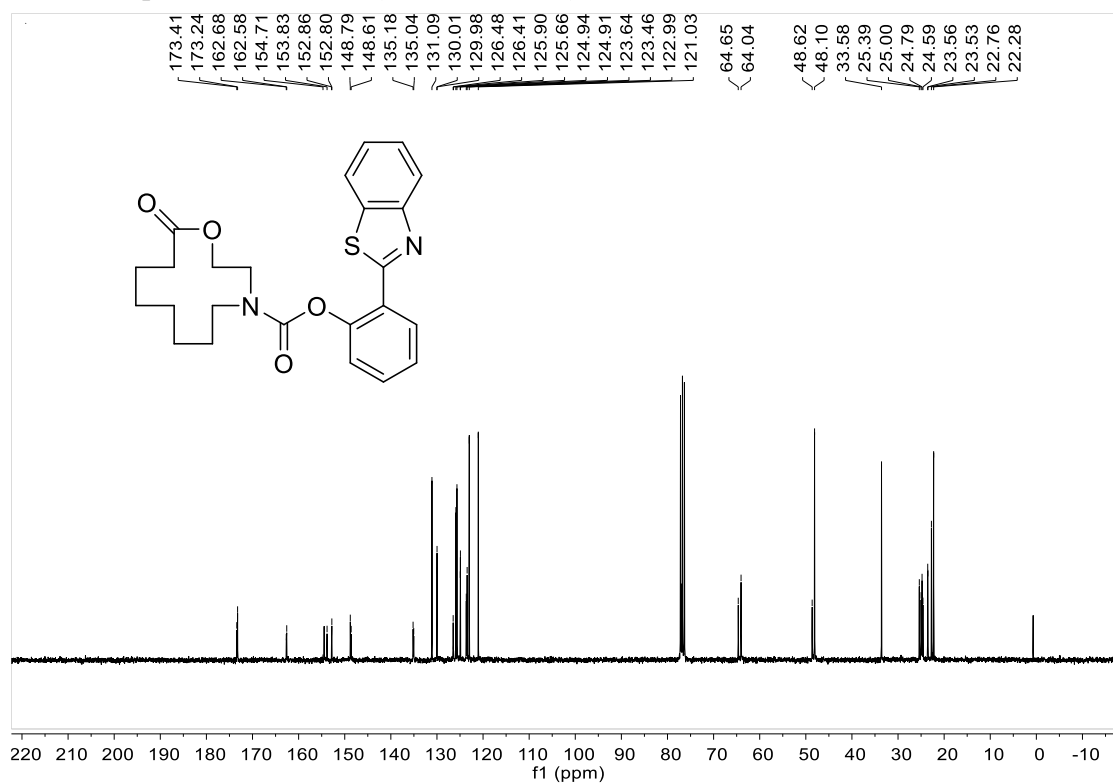

**<sup>1</sup>H NMR spectrum of D12-11 (300 MHz, CDCl<sub>3</sub>)**

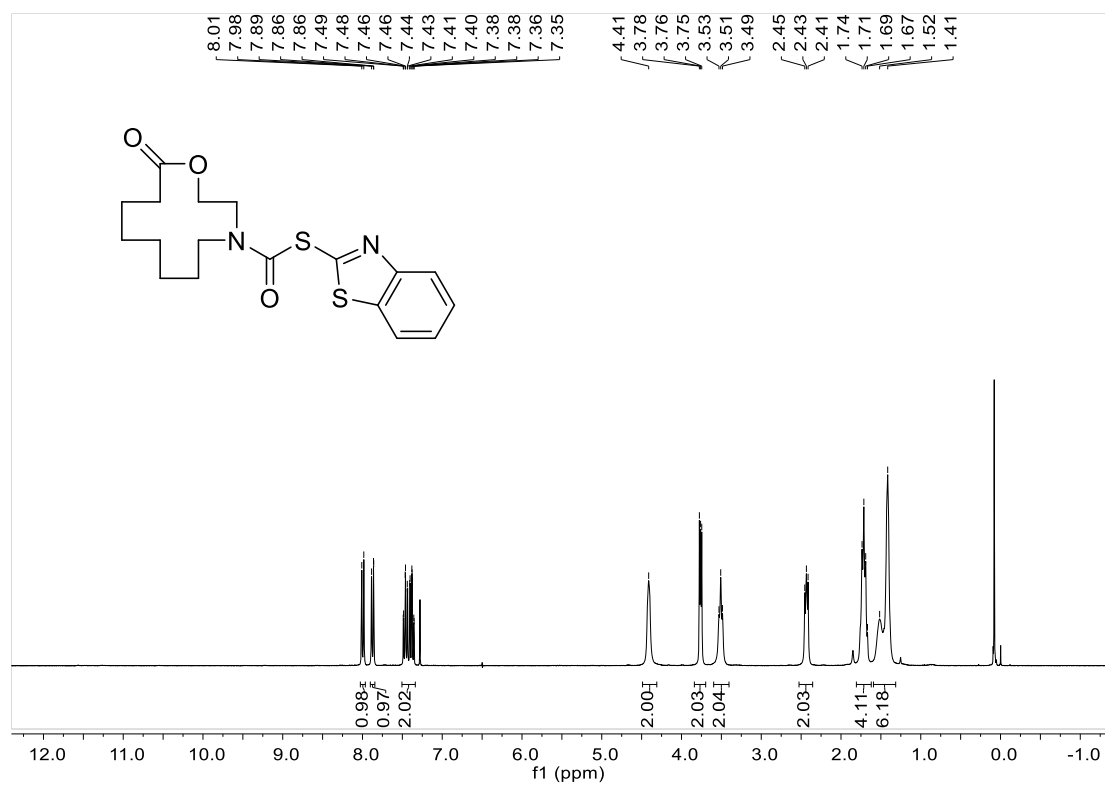

**<sup>13</sup>C NMR spectrum of D12-11 (75 MHz, CDCl<sub>3</sub>)**

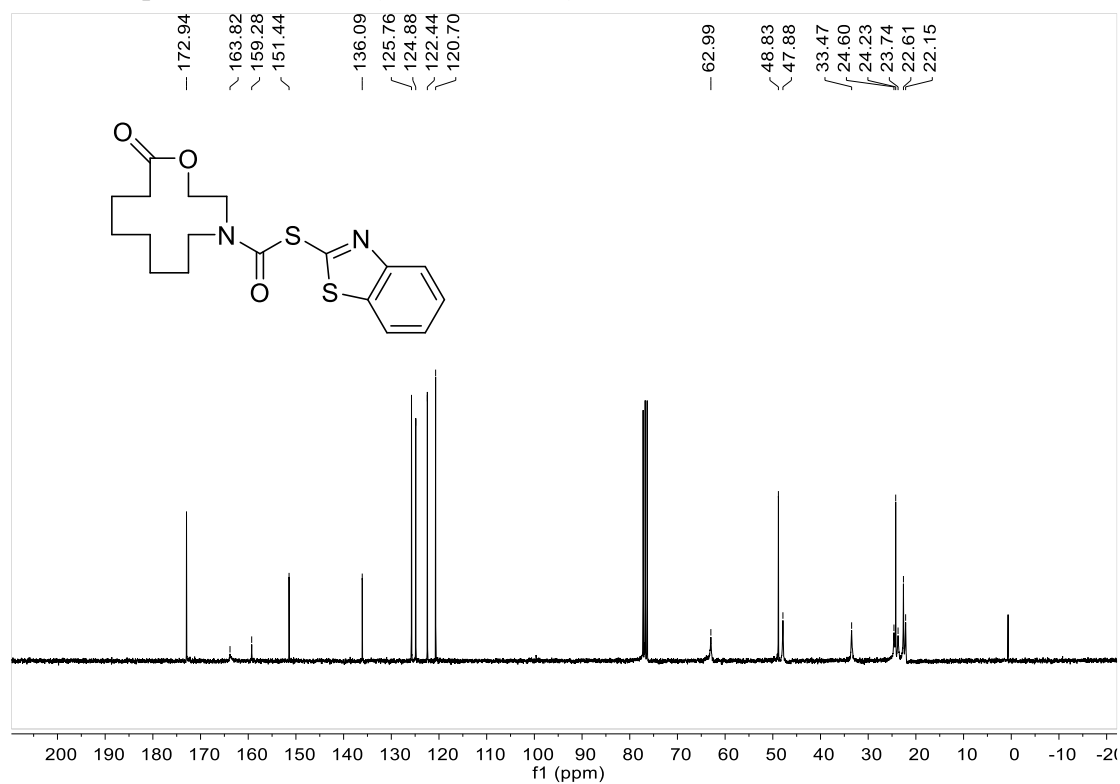

**<sup>1</sup>H NMR spectrum of D12-12 (300 MHz, CDCl<sub>3</sub>)**

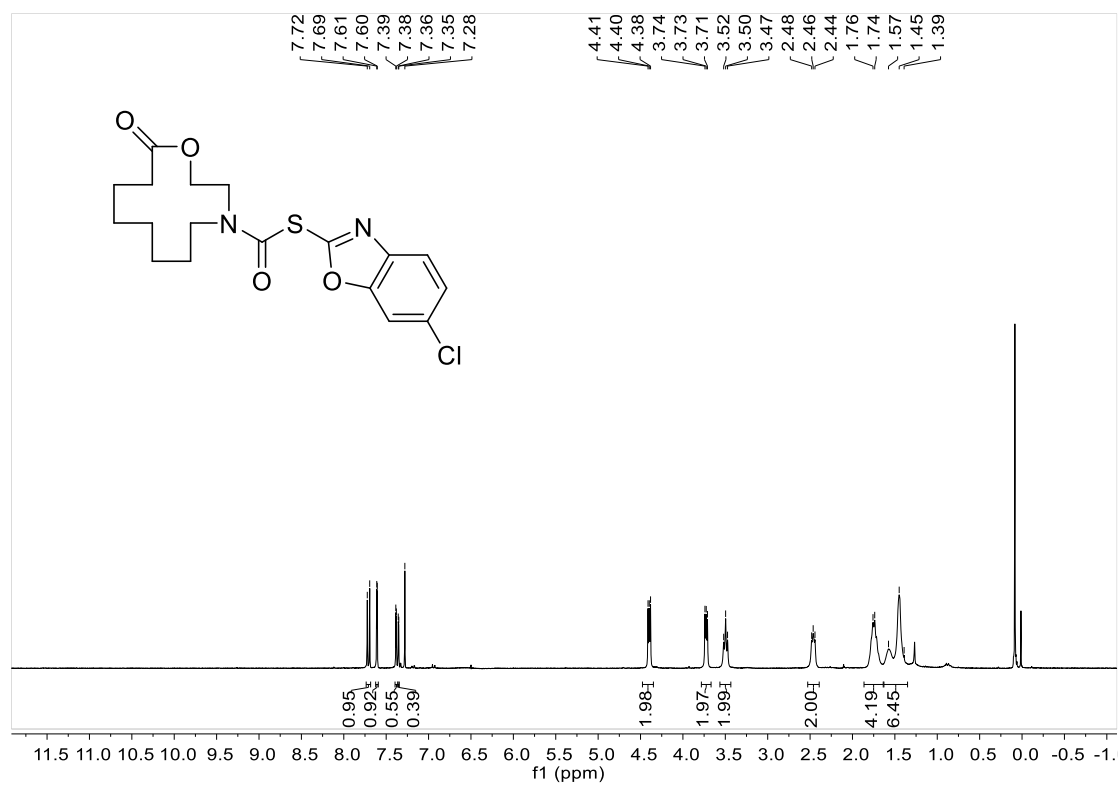

**<sup>13</sup>C NMR spectrum of D12-12 (75 MHz, CDCl<sub>3</sub>)**

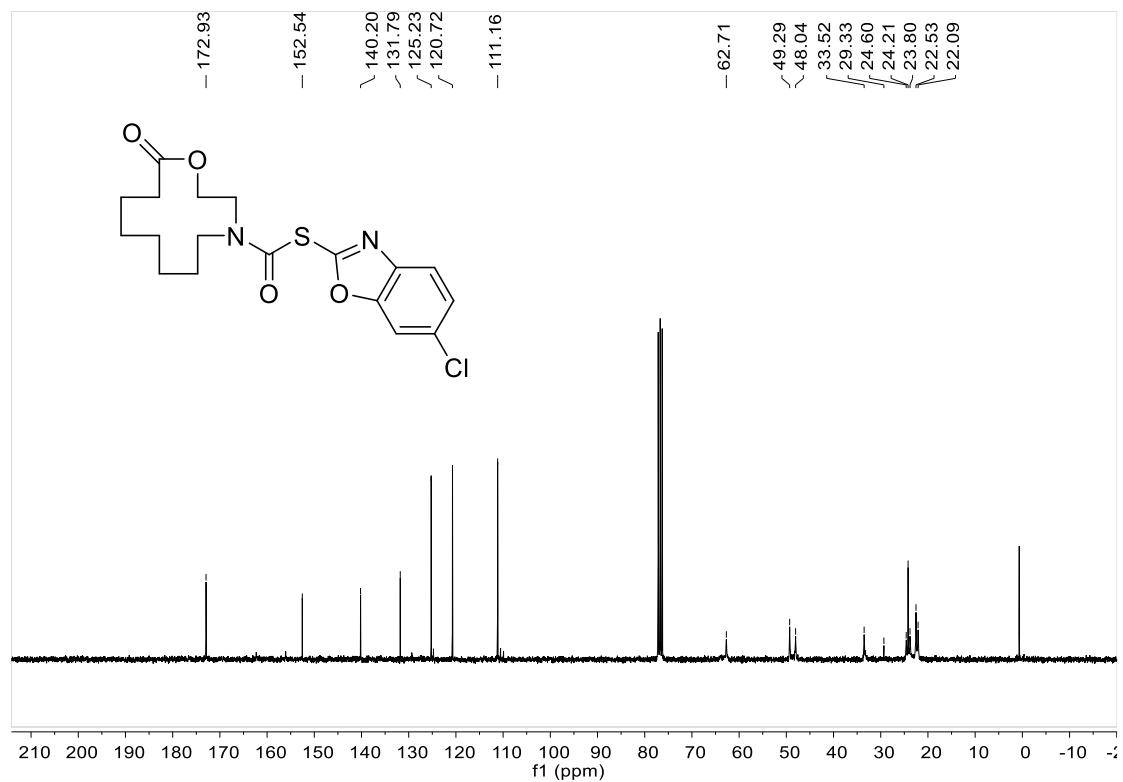

**<sup>1</sup>H NMR spectrum of D12-13 (300 MHz, CDCl<sub>3</sub>)**

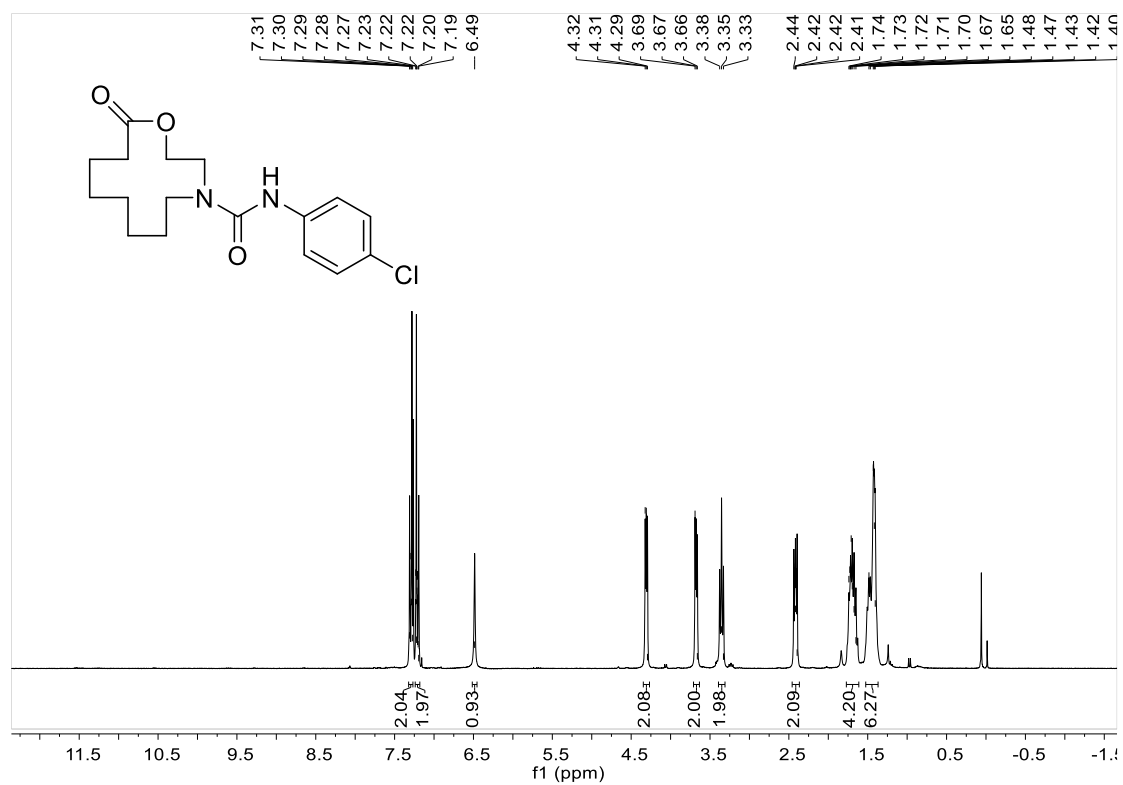

**<sup>13</sup>C NMR spectrum of D12-13 (75 MHz, CDCl<sub>3</sub>)**

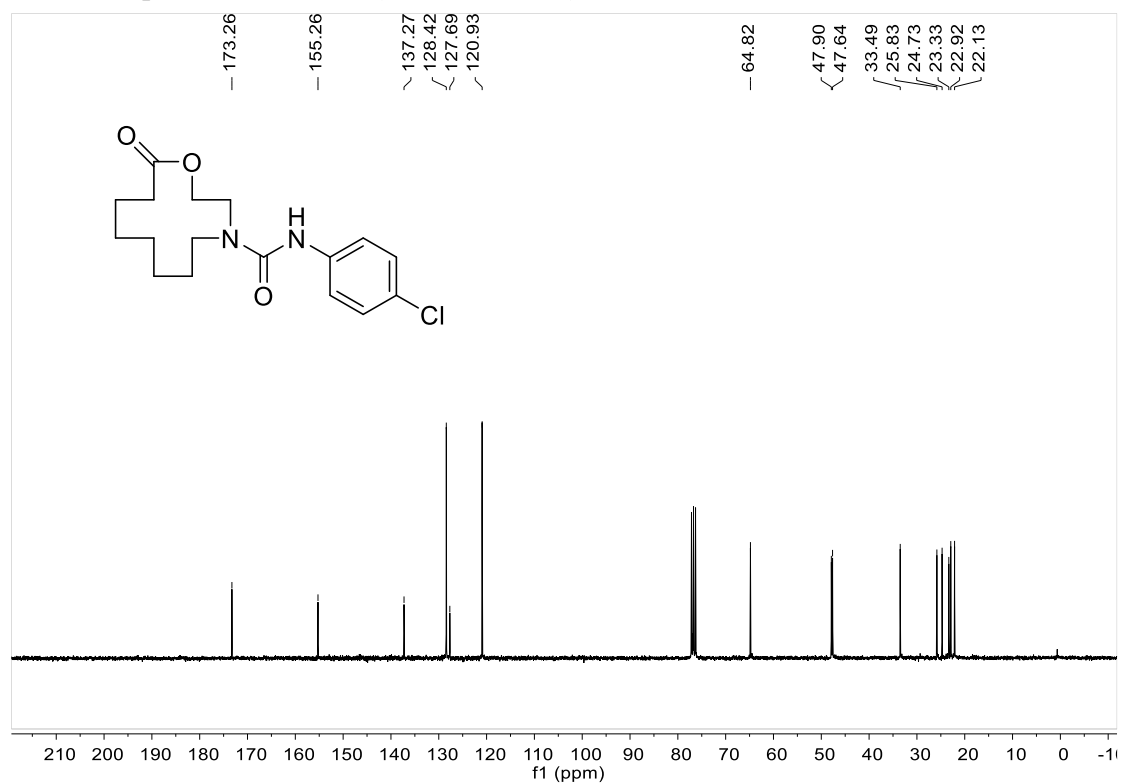

**<sup>1</sup>H NMR spectrum of D12-14 (300 MHz, CDCl<sub>3</sub>)**

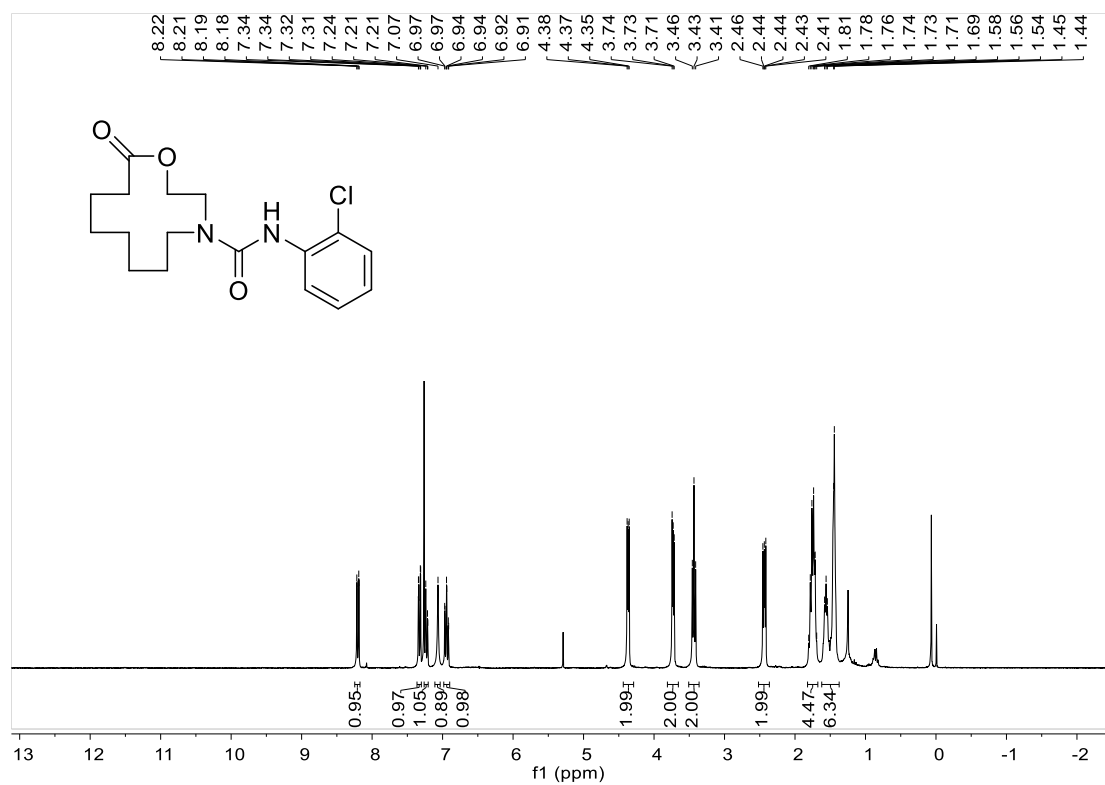

**<sup>13</sup>C NMR spectrum of D12-14 (75 MHz, CDCl<sub>3</sub>)**

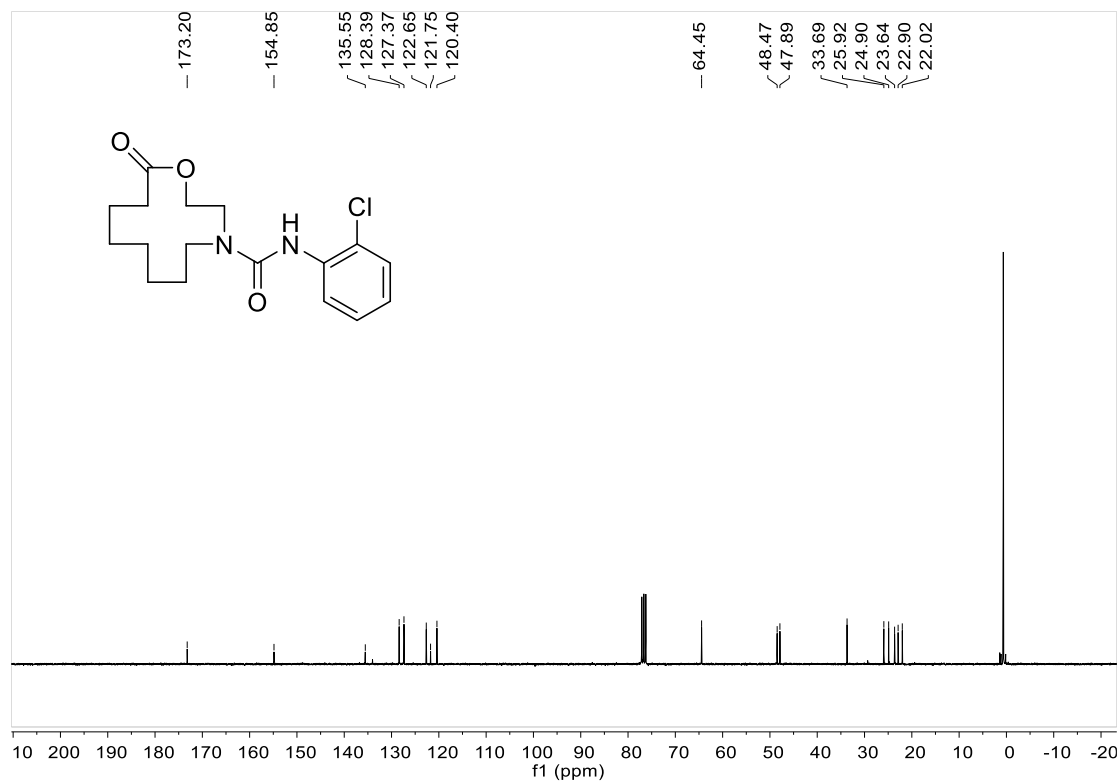

**<sup>1</sup>H NMR spectrum of D12-15 (300 MHz, CDCl<sub>3</sub>)**

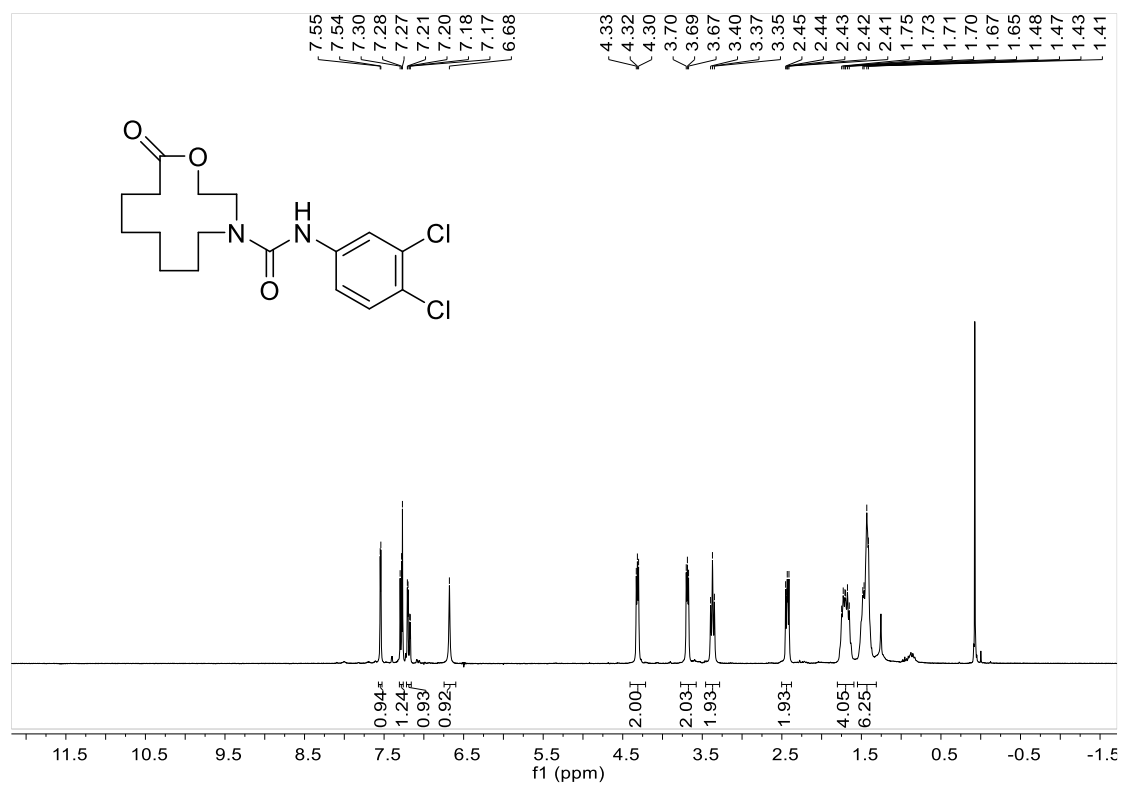

**<sup>13</sup>C NMR spectrum of D12-15 (75 MHz, CDCl<sub>3</sub>)**

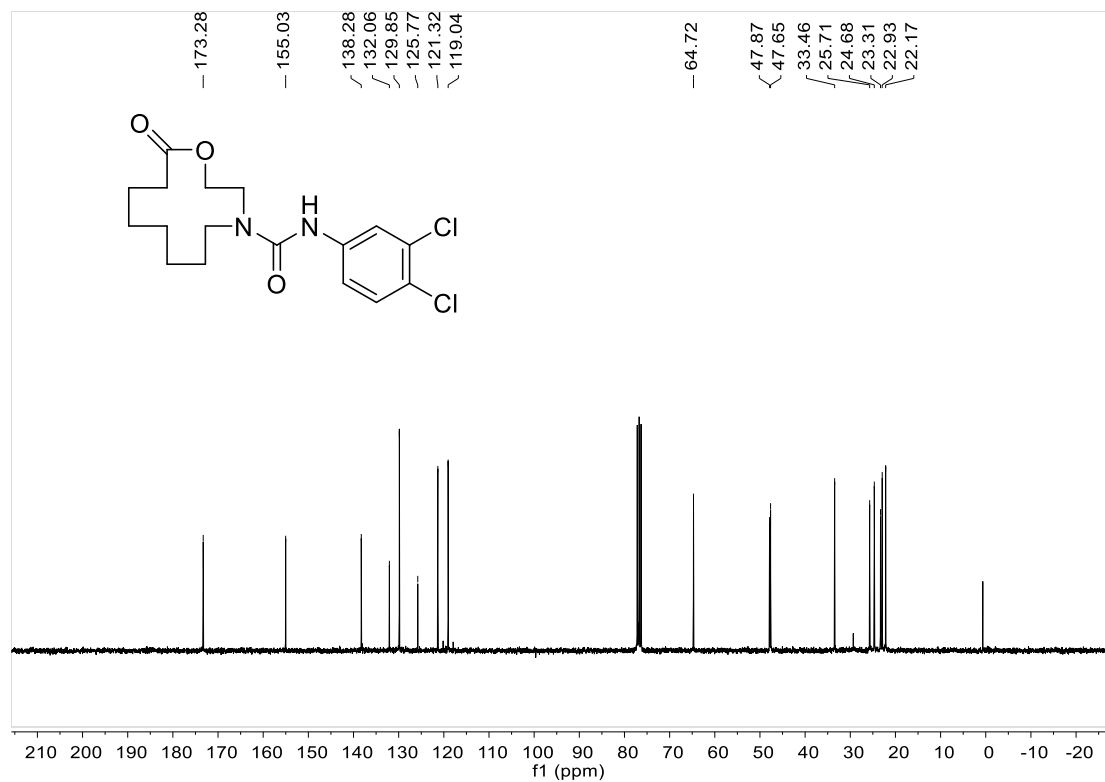

**<sup>1</sup>H NMR spectrum of D12-16 (300 MHz, CDCl<sub>3</sub>)**

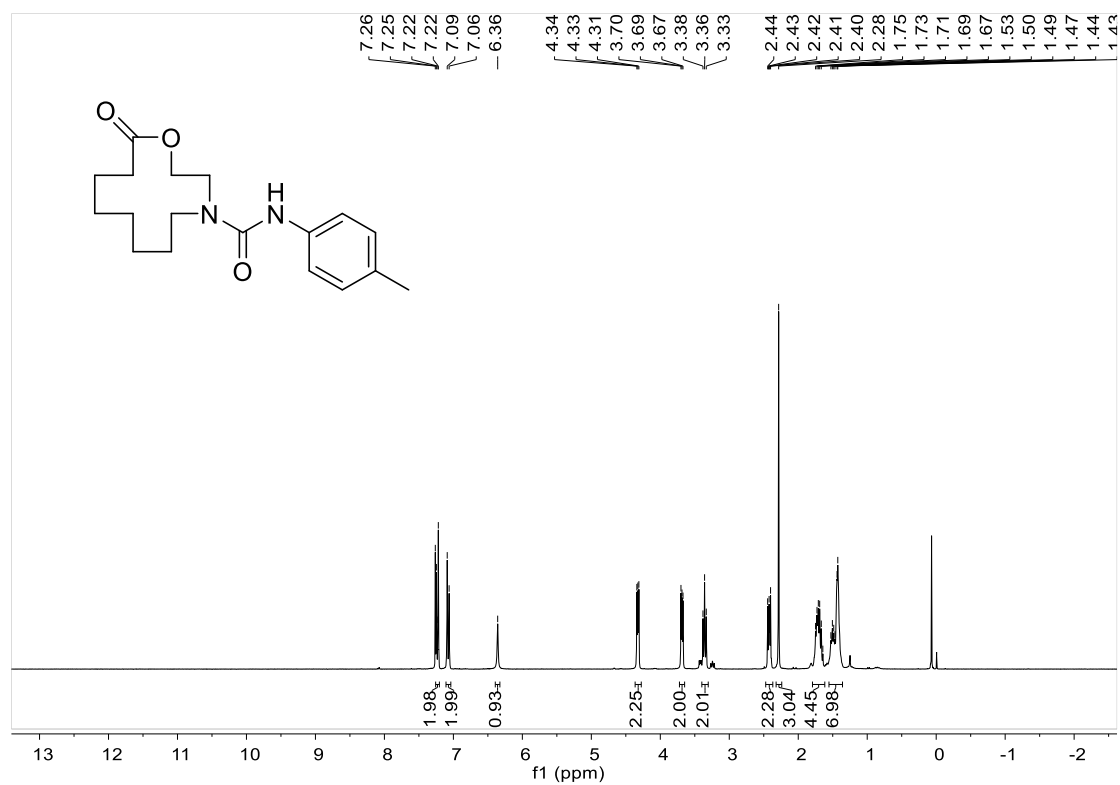

**<sup>13</sup>C NMR spectrum of D12-16 (75 MHz, CDCl<sub>3</sub>)**

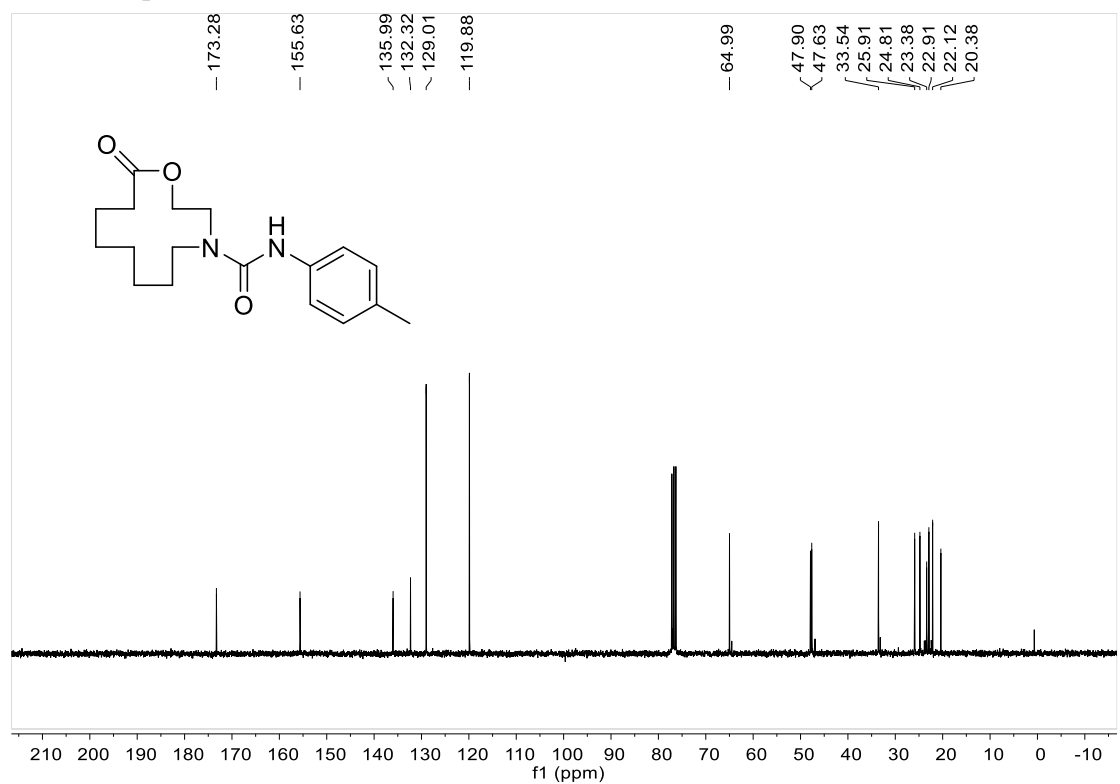



**<sup>1</sup>H NMR spectrum of D12-17 (300 MHz, CDCl<sub>3</sub>)**

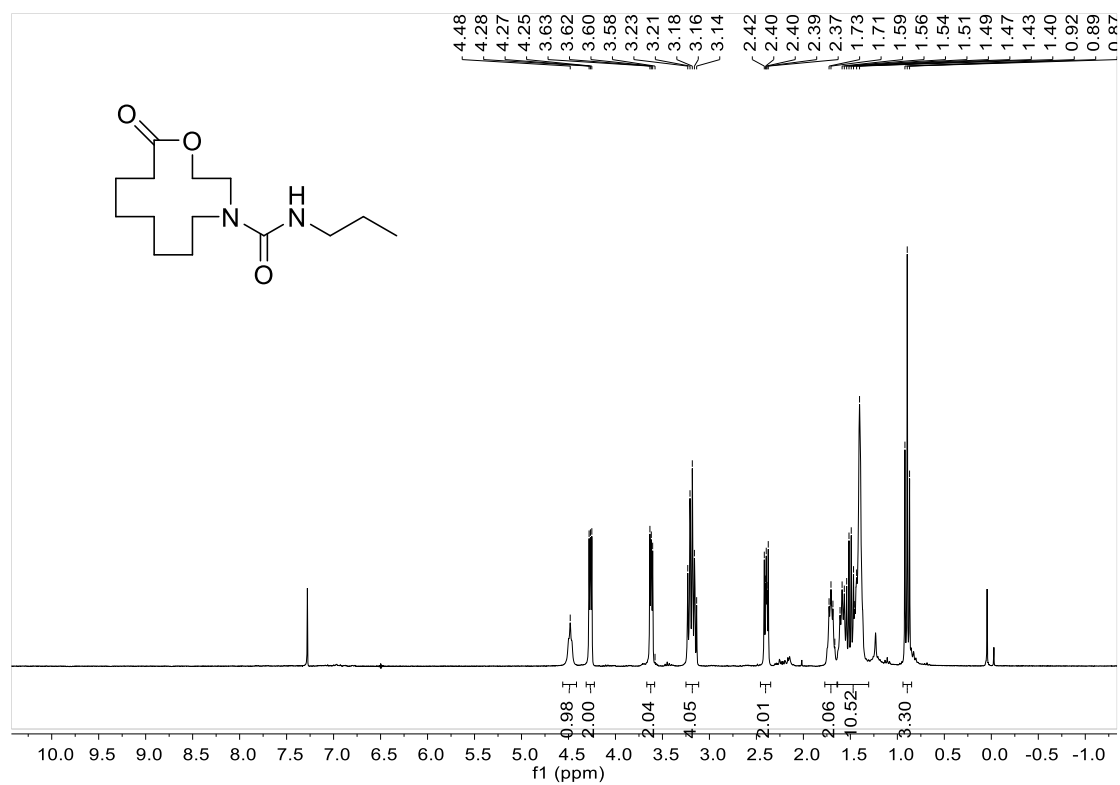

**<sup>13</sup>C NMR spectrum of D12-17 (75 MHz, CDCl<sub>3</sub>)**

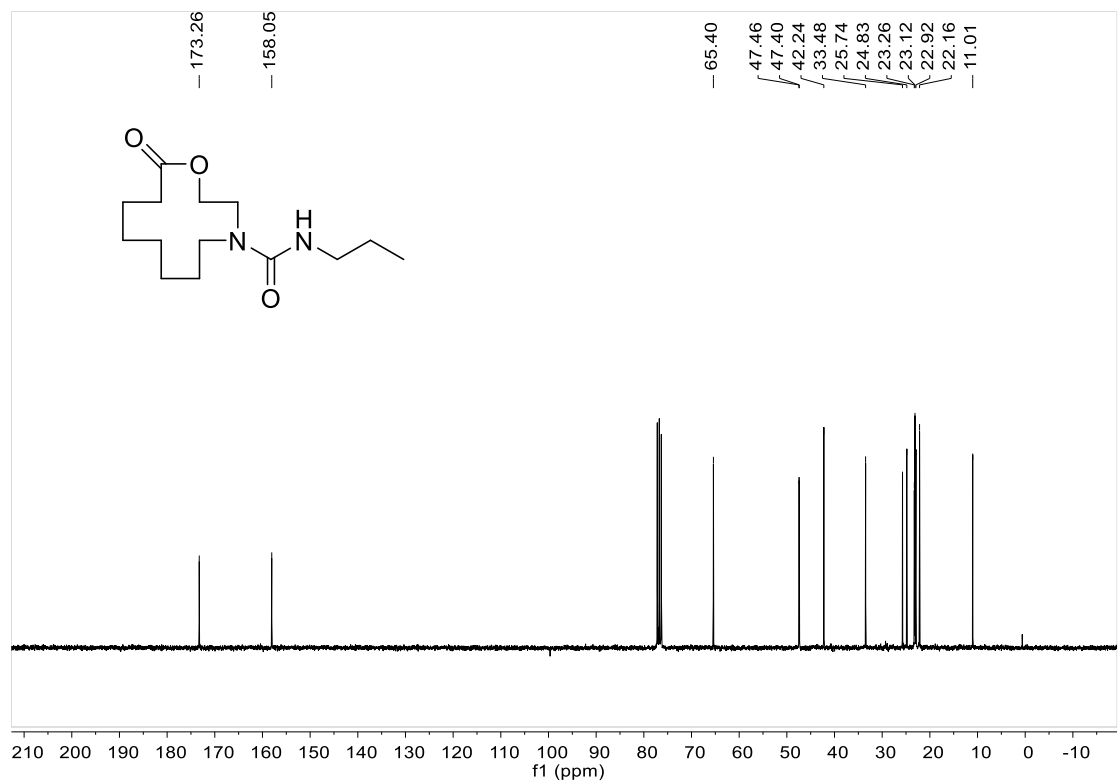

**<sup>1</sup>H NMR spectrum of D12-18 (300 MHz, CDCl<sub>3</sub>)**

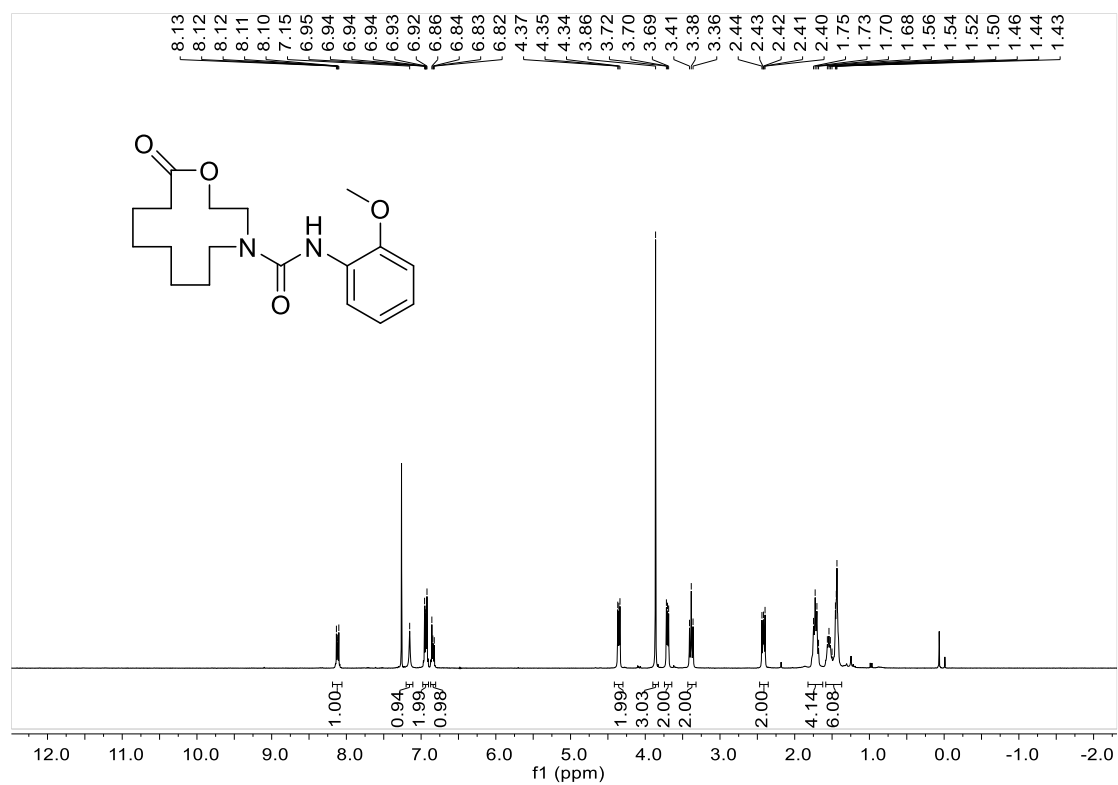

**<sup>13</sup>C NMR spectrum of D12-18 (75 MHz, CDCl<sub>3</sub>)**

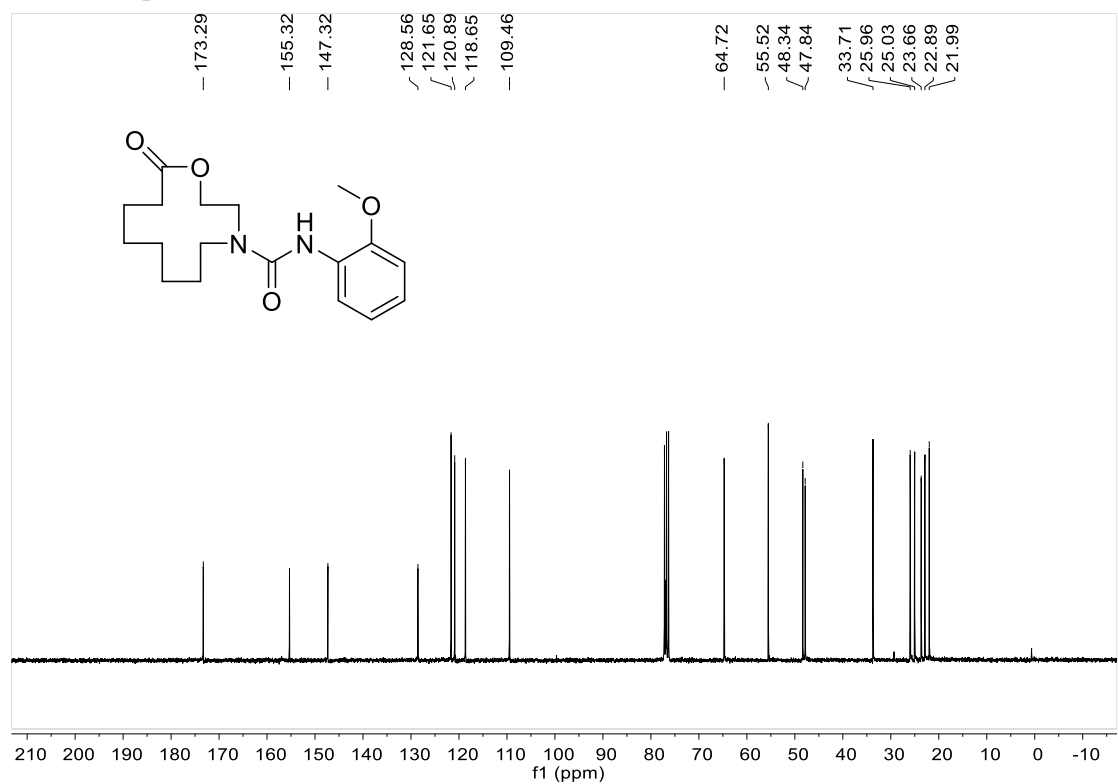

**<sup>1</sup>H NMR spectrum of D16-1 (300 MHz, CDCl<sub>3</sub>)**

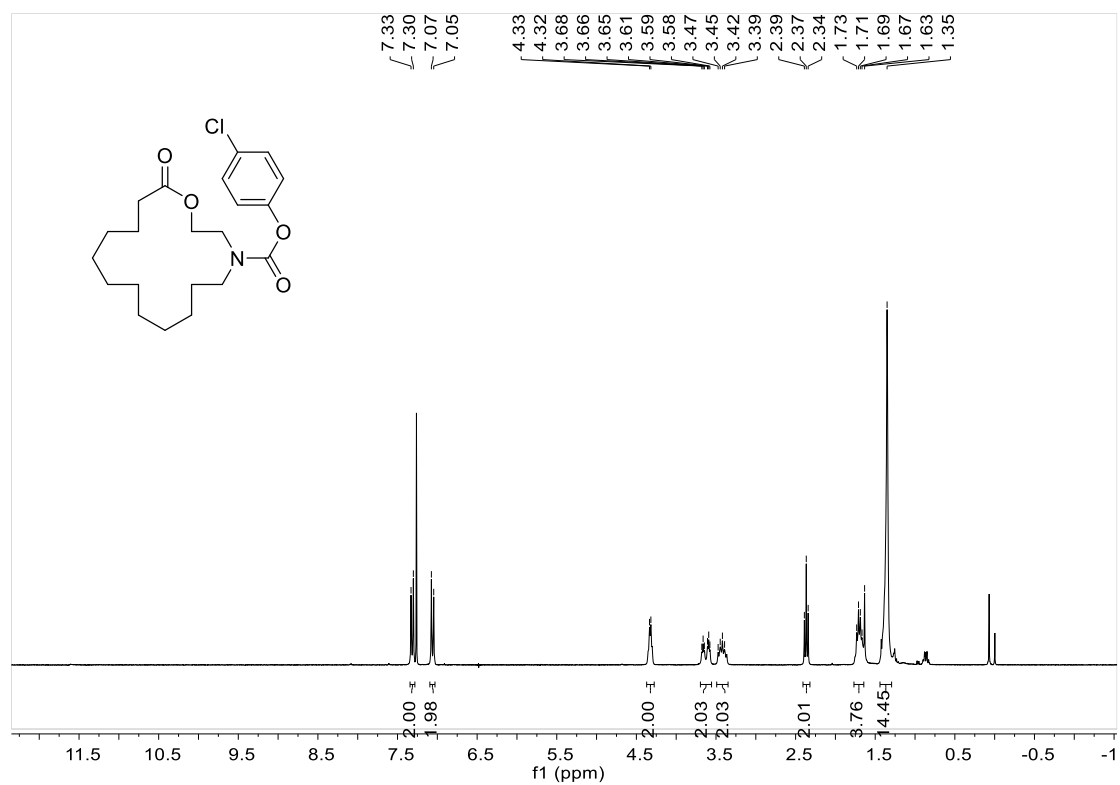

**<sup>13</sup>C NMR spectrum of D16-1 (75 MHz, CDCl<sub>3</sub>)**

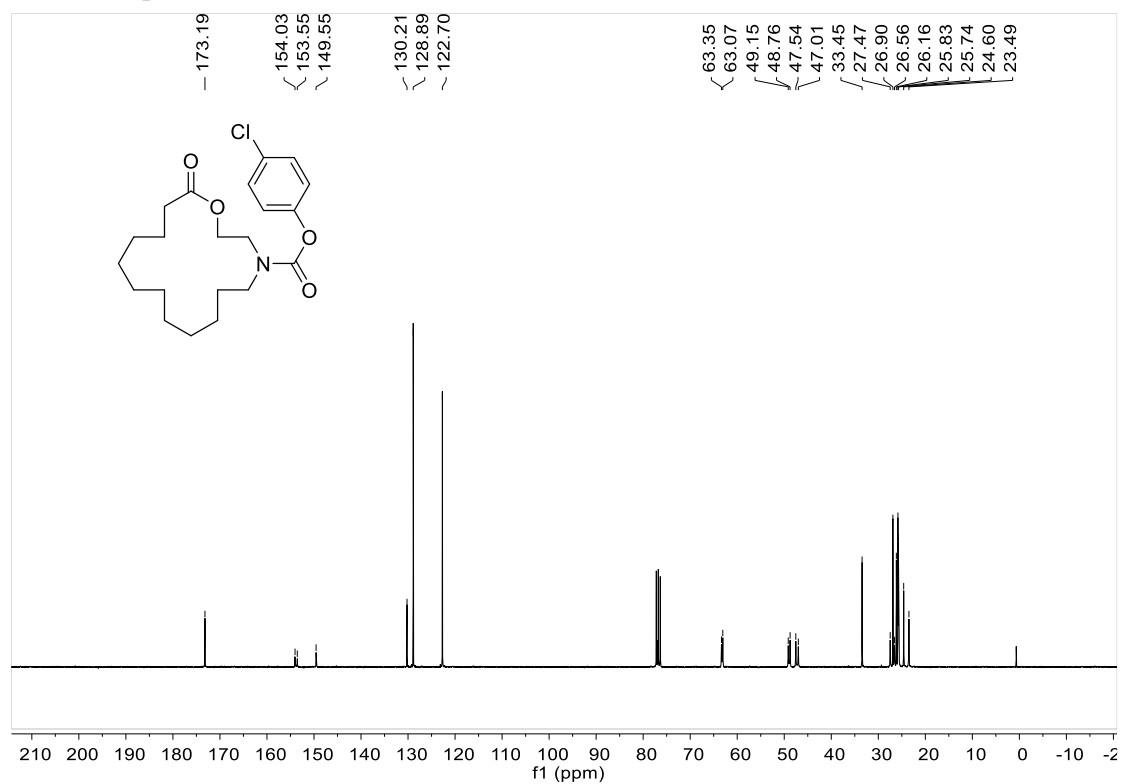

**<sup>1</sup>H NMR spectrum of D16-2 (300 MHz, CDCl<sub>3</sub>)**

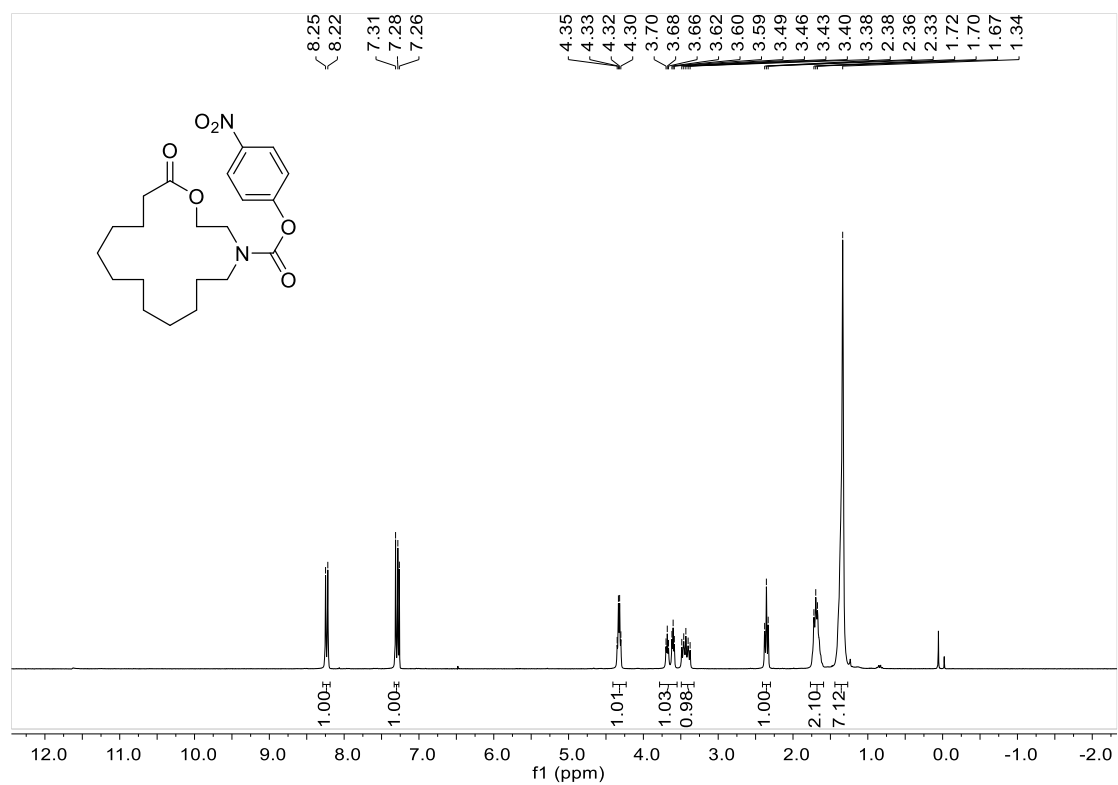

**<sup>13</sup>C NMR spectrum of D16-2 (75 MHz, CDCl<sub>3</sub>)**

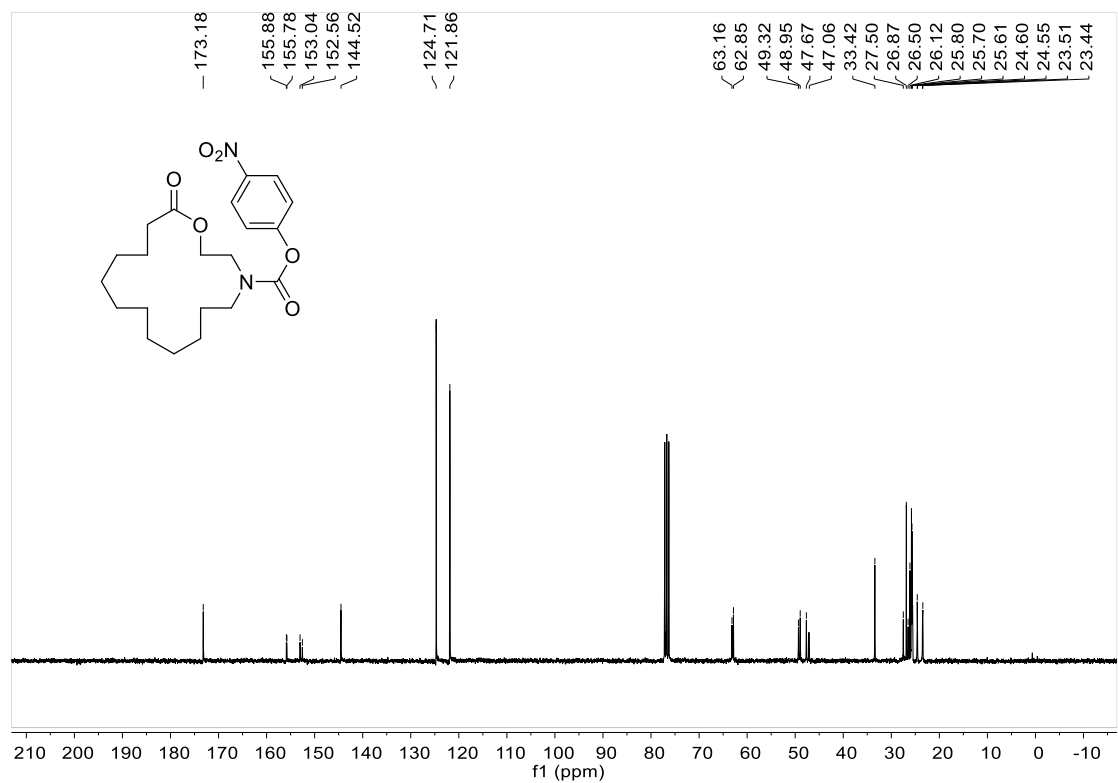

**<sup>1</sup>H NMR spectrum of D16-3 (300 MHz, CDCl<sub>3</sub>)**

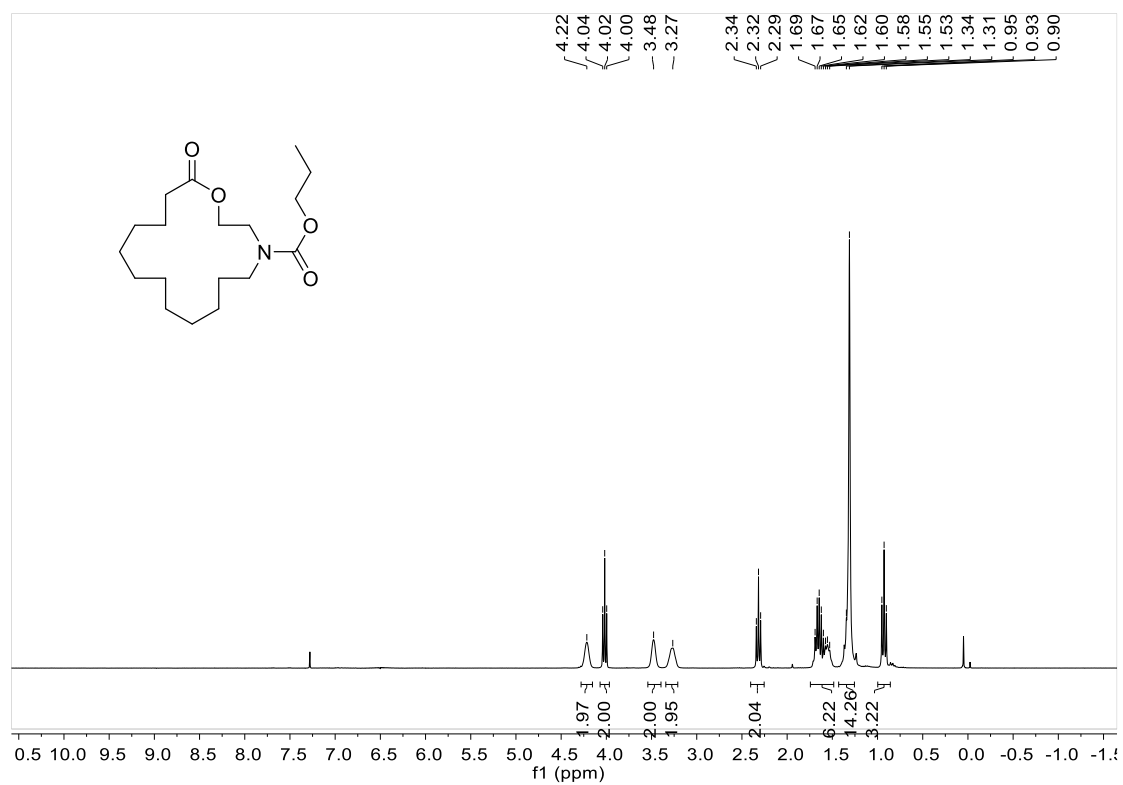

**<sup>13</sup>C NMR spectrum of D16-3 (75 MHz, CDCl<sub>3</sub>)**

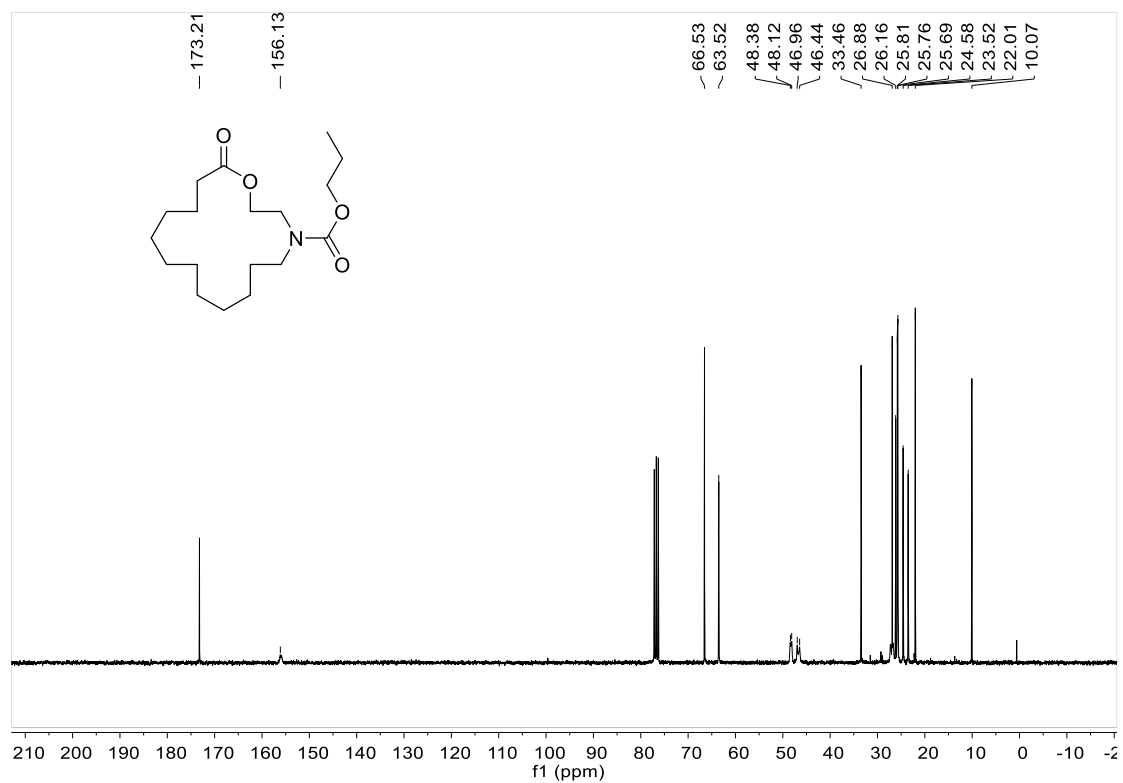

**<sup>1</sup>H NMR spectrum of D16-4 (300 MHz, CDCl<sub>3</sub>)**

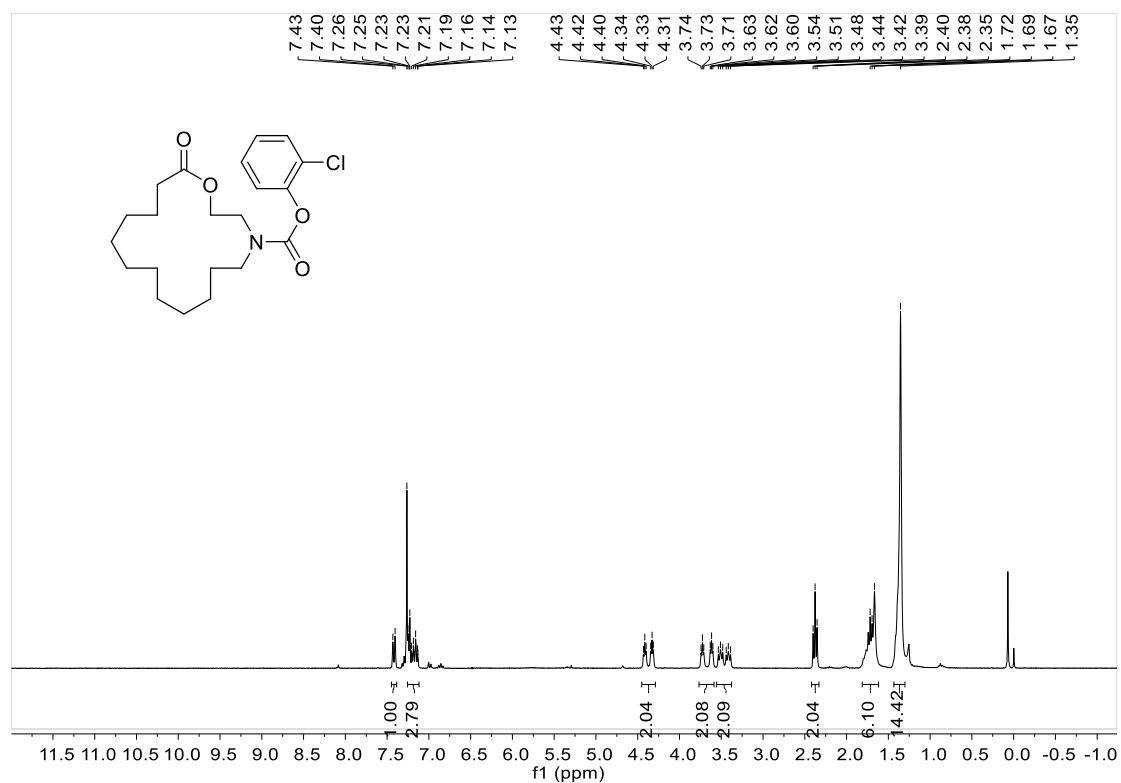

**<sup>13</sup>C NMR spectrum of D16-4 (75 MHz, CDCl<sub>3</sub>)**

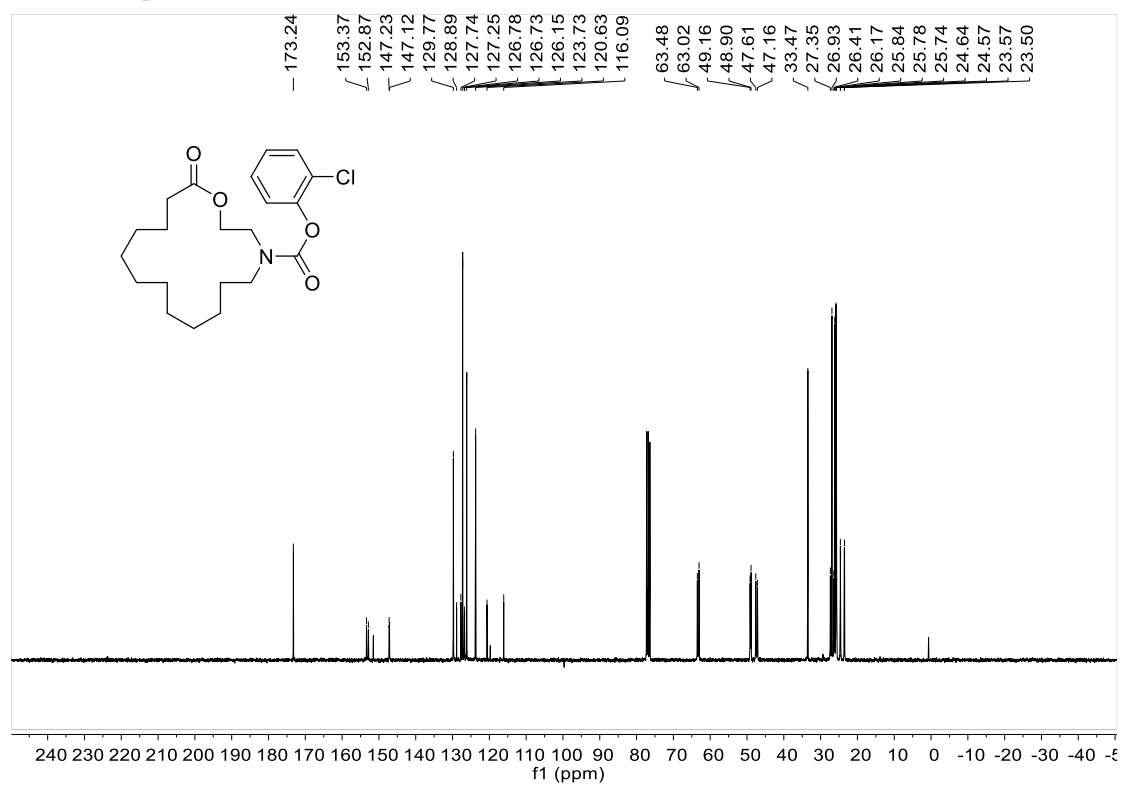

**<sup>1</sup>H NMR spectrum of D16-5 (300 MHz, CDCl<sub>3</sub>)**

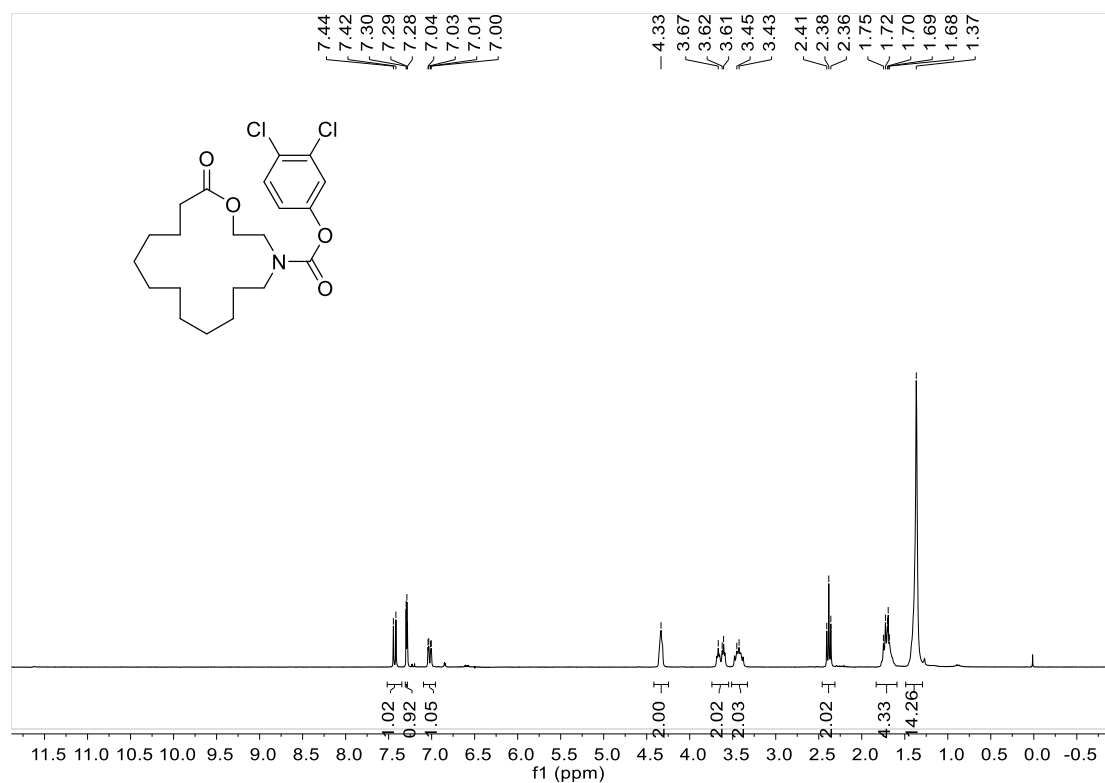

**<sup>13</sup>C NMR spectrum of D16-5 (75 MHz, CDCl<sub>3</sub>)**

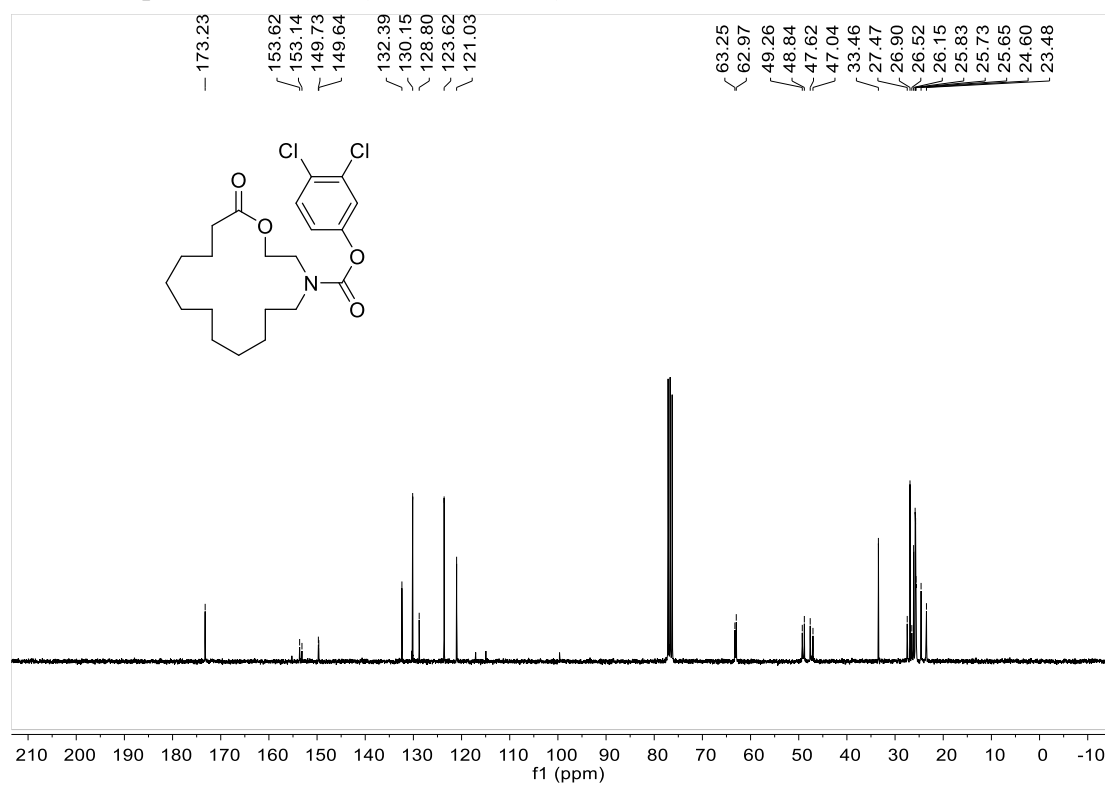

**<sup>1</sup>H NMR spectrum of D16-6 (300 MHz, CDCl<sub>3</sub>)**

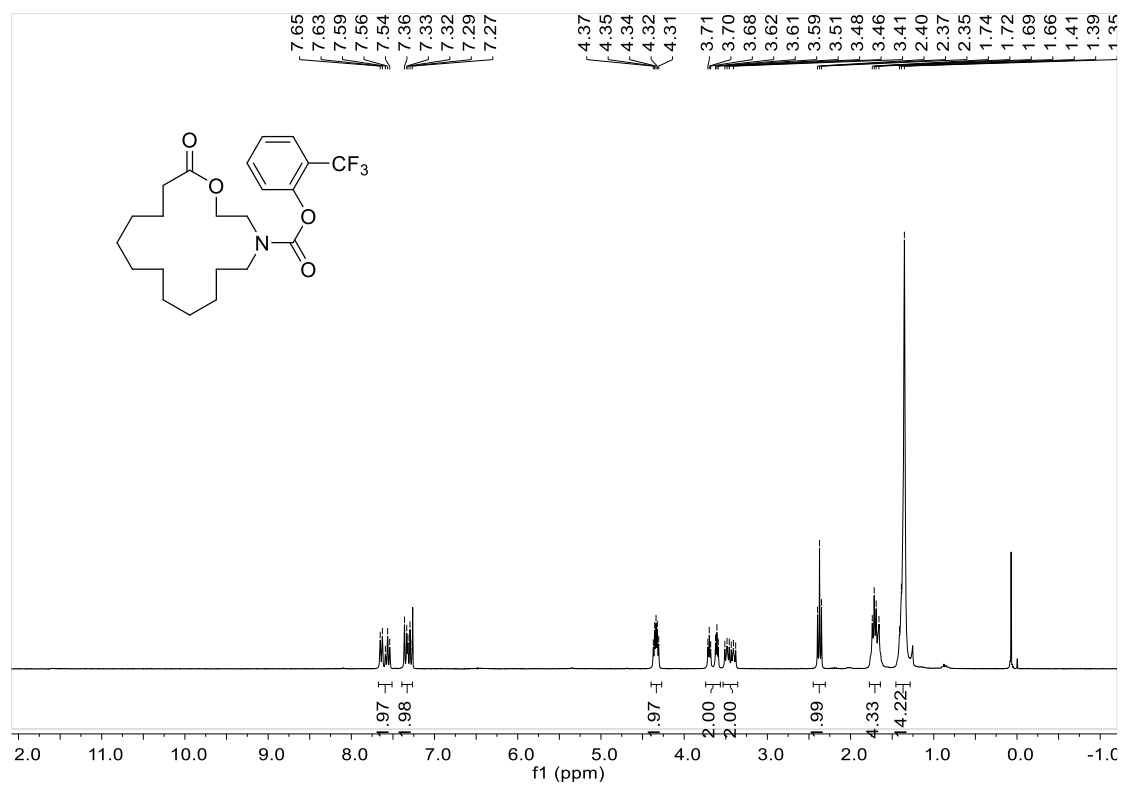

**<sup>13</sup>C NMR spectrum of D16-6 (75 MHz, CDCl<sub>3</sub>)**

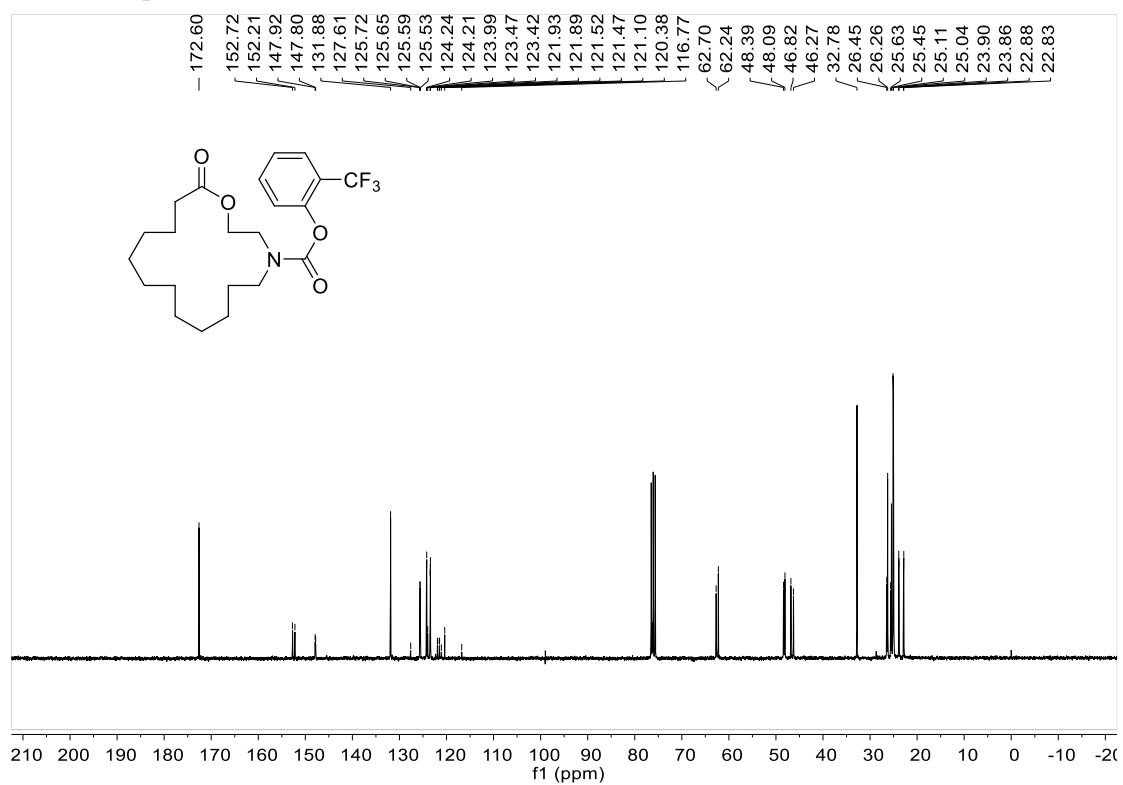



**<sup>1</sup>H NMR spectrum of D16-7 (300 MHz, CDCl<sub>3</sub>)**

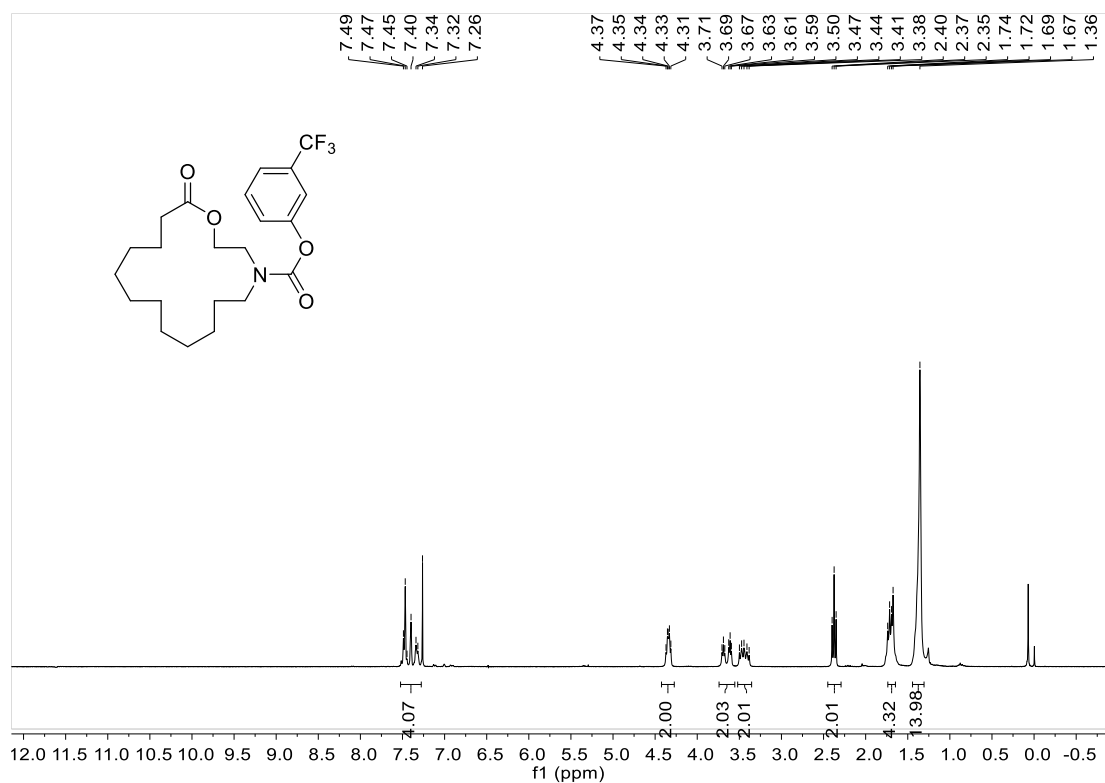

**<sup>13</sup>C NMR spectrum of D16-7 (75 MHz, CDCl<sub>3</sub>)**

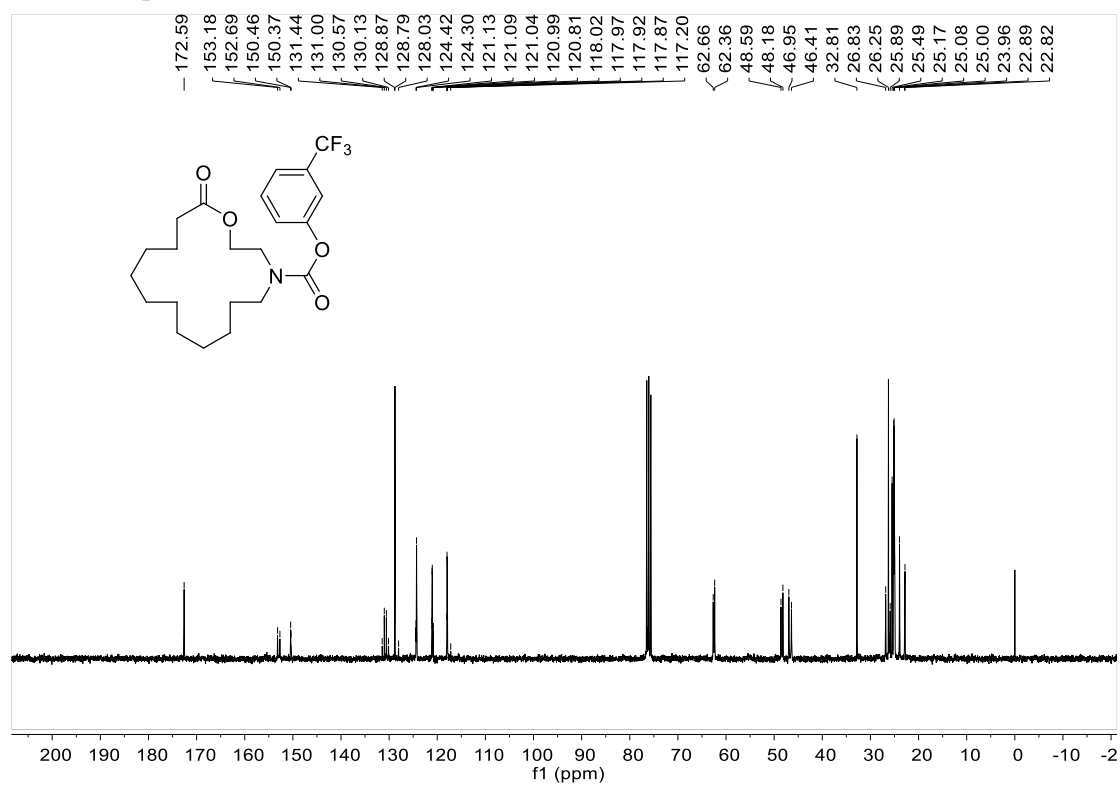

**<sup>1</sup>H NMR spectrum of D16-8 (300 MHz, CDCl<sub>3</sub>)**

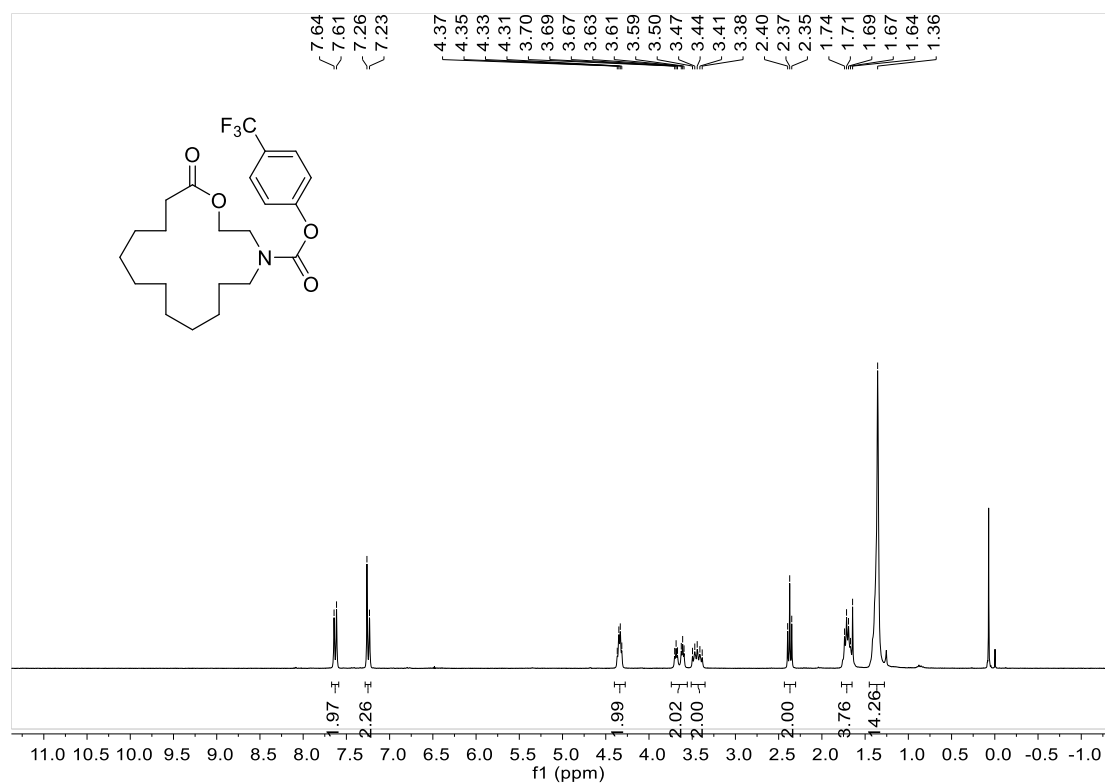

**<sup>13</sup>C NMR spectrum of D16-8 (75 MHz, CDCl<sub>3</sub>)**

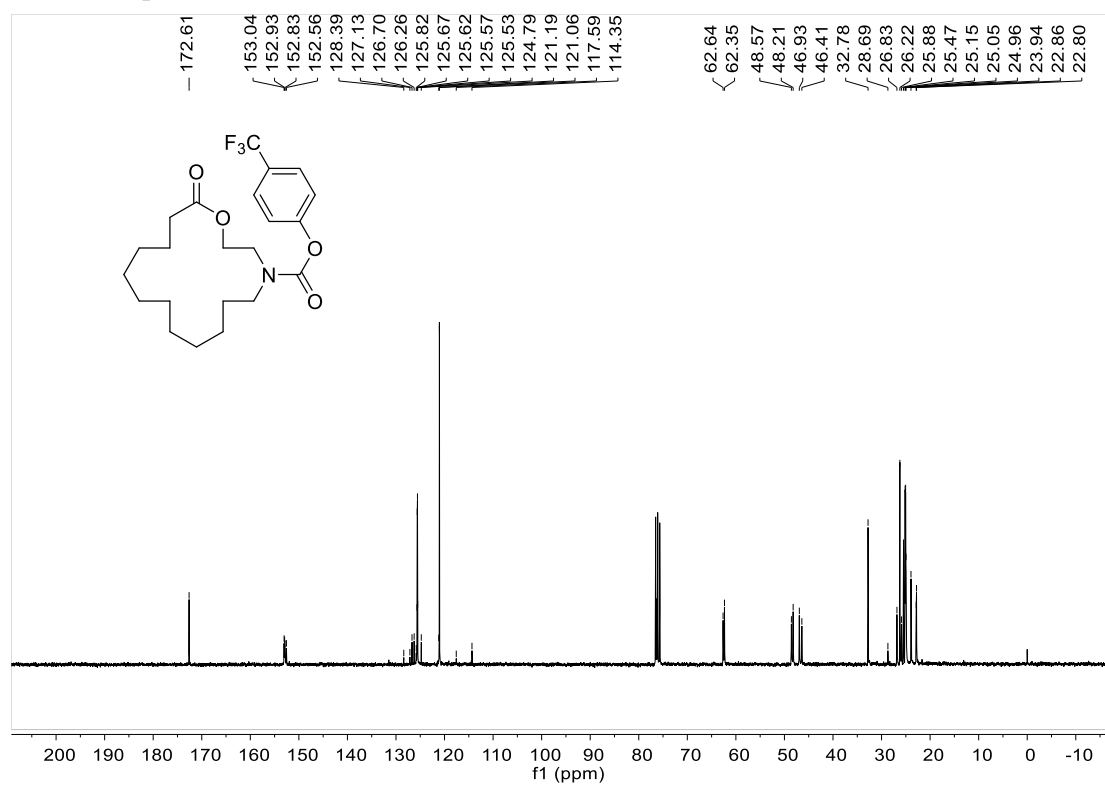

**<sup>1</sup>H NMR spectrum of D16-9 (300 MHz, CDCl<sub>3</sub>)**

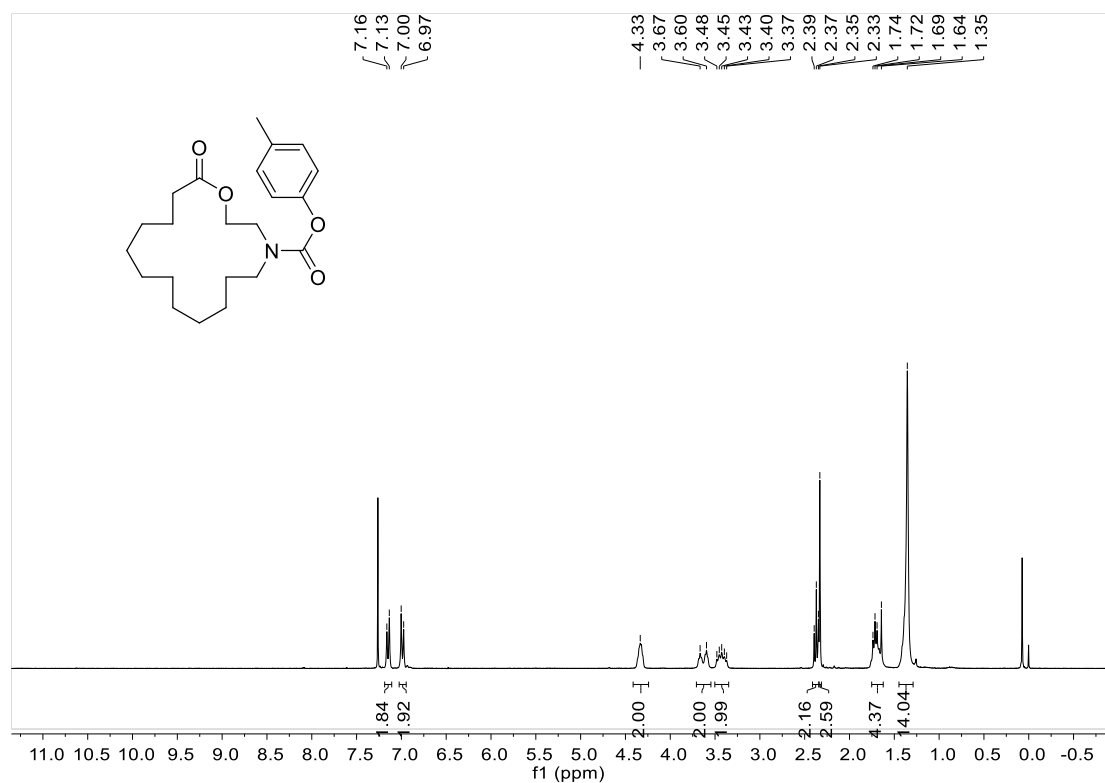

**<sup>13</sup>C NMR spectrum of D16-9 (75 MHz, CDCl<sub>3</sub>)**

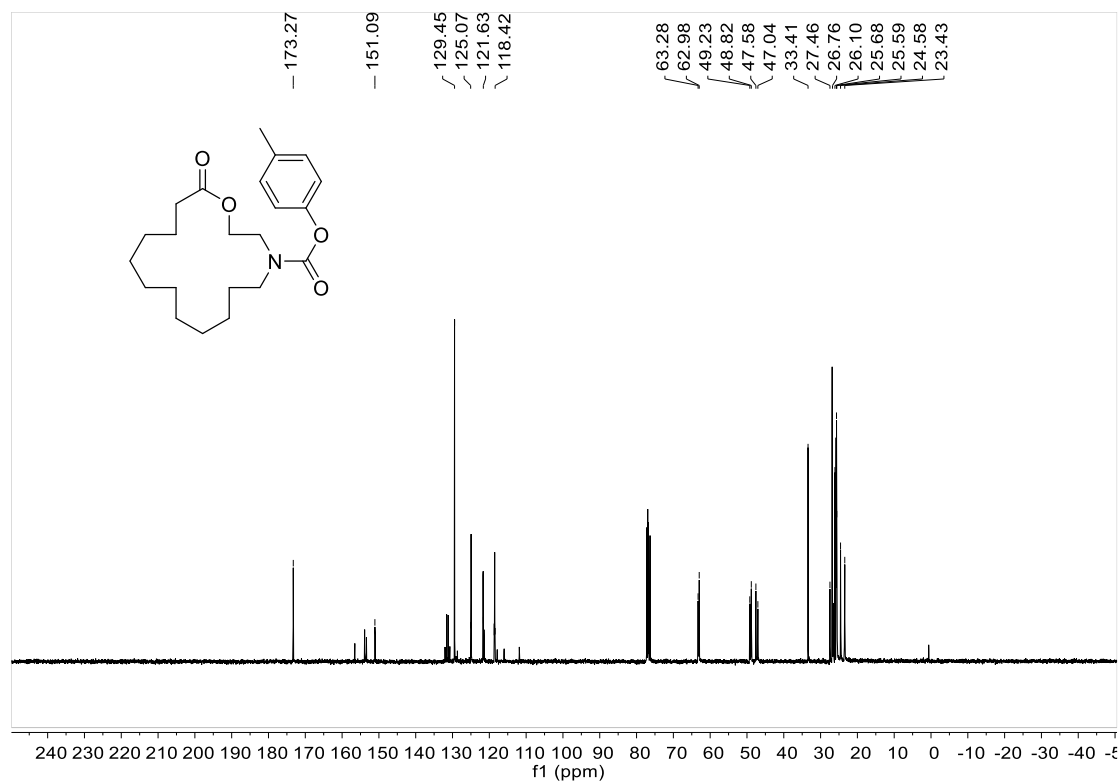

**<sup>1</sup>H NMR spectrum of D16-10 (300 MHz, CDCl<sub>3</sub>)**

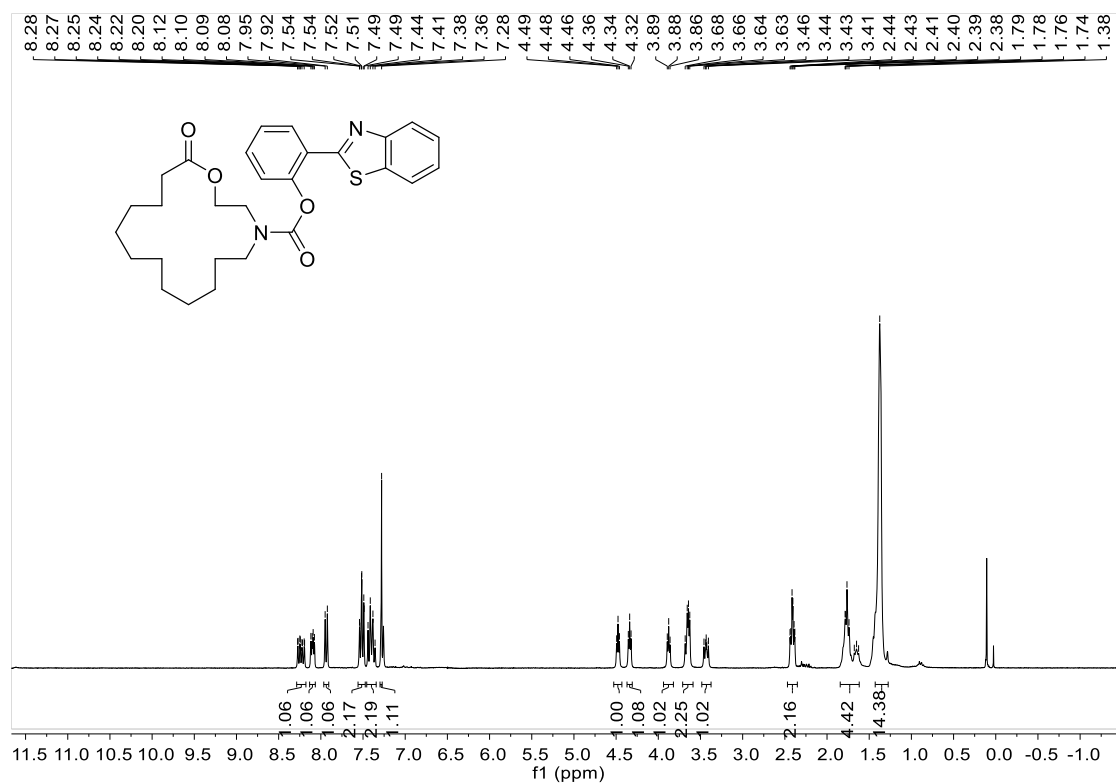

**<sup>13</sup>C NMR spectrum of D16-10 (75 MHz, CDCl<sub>3</sub>)**

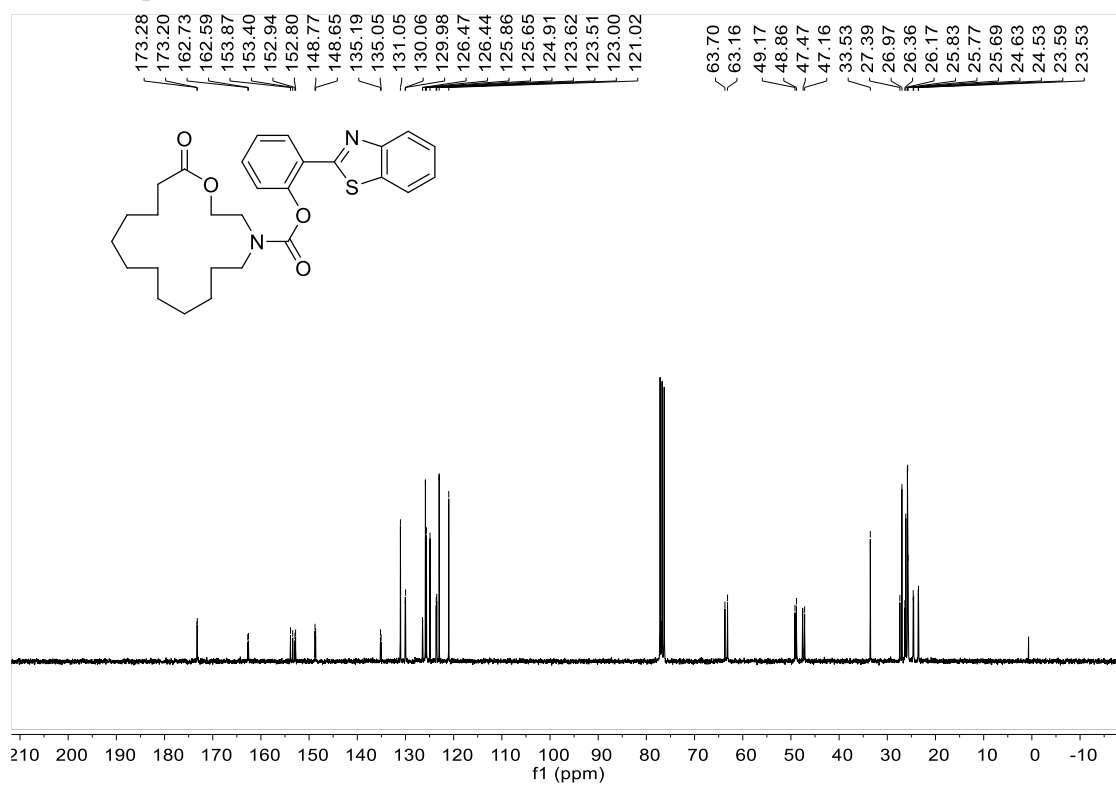

**<sup>1</sup>H NMR spectrum of D16-11 (300 MHz, CDCl<sub>3</sub>)**

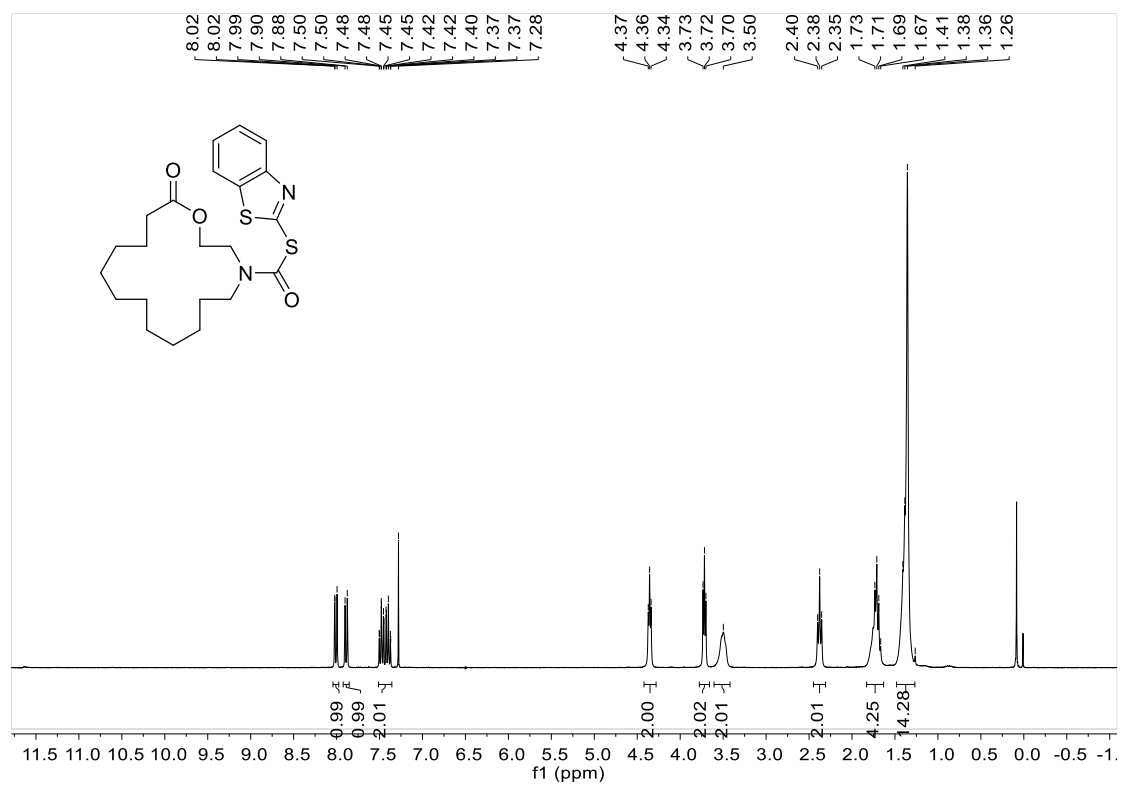

**<sup>13</sup>C NMR spectrum of D16-11 (75 MHz, CDCl<sub>3</sub>)**

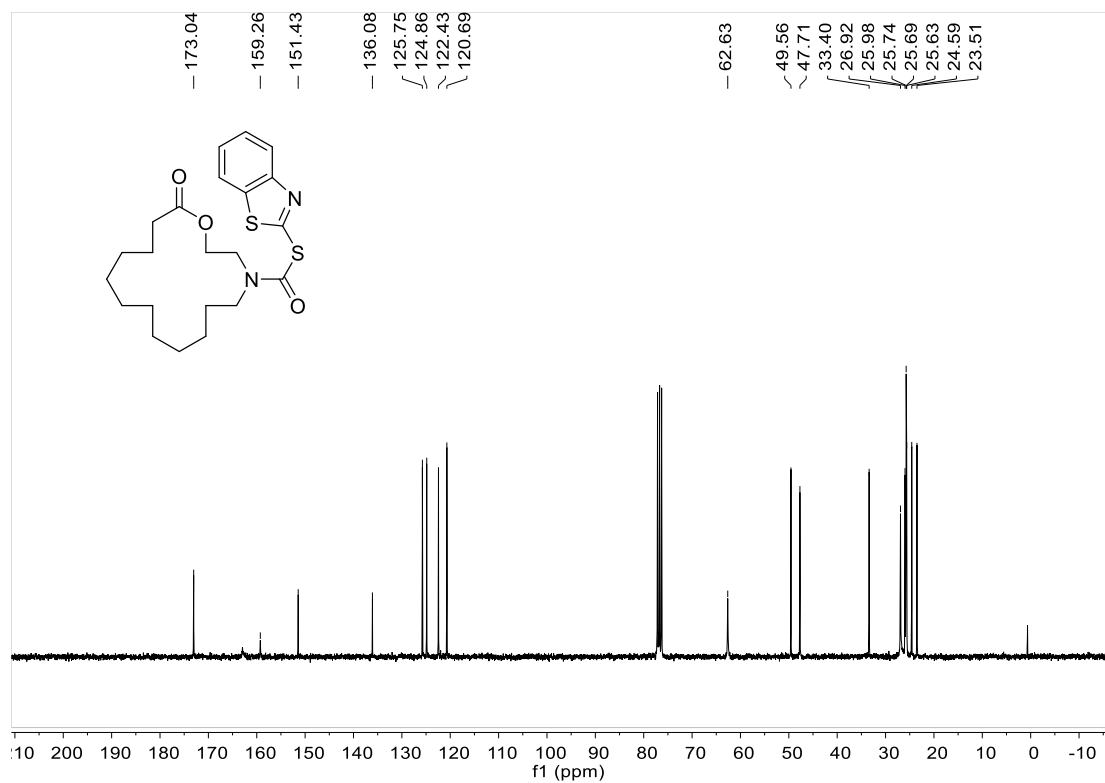

**<sup>1</sup>H NMR spectrum of D16-12 (300 MHz, CDCl<sub>3</sub>)**

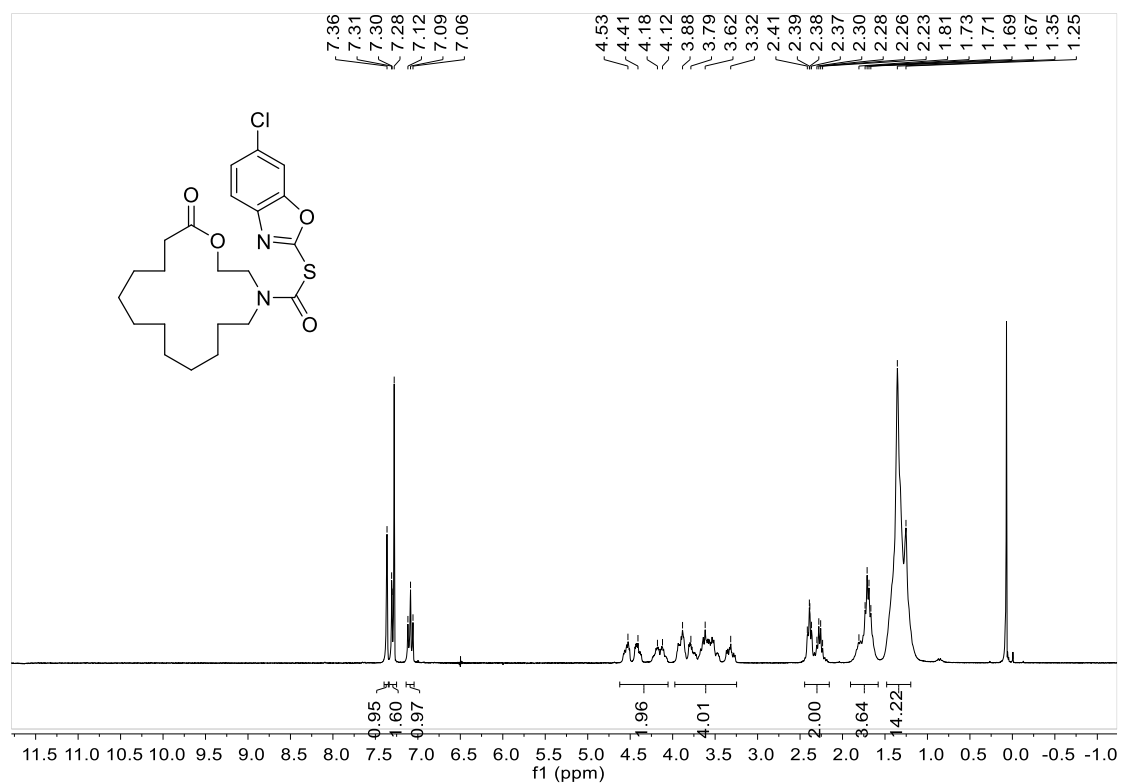

**<sup>13</sup>C NMR spectrum of D16-12 (75 MHz, CDCl<sub>3</sub>)**

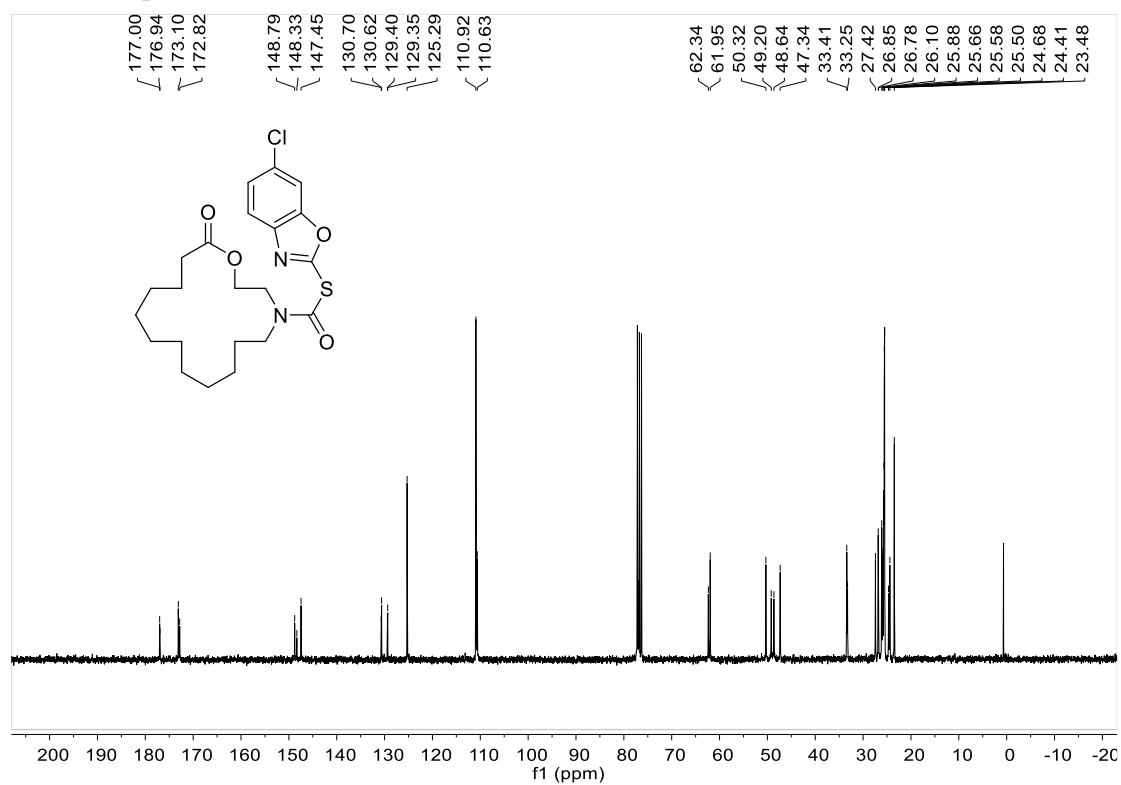

**<sup>1</sup>H NMR spectrum of D16-13 (300 MHz, CDCl<sub>3</sub>)**

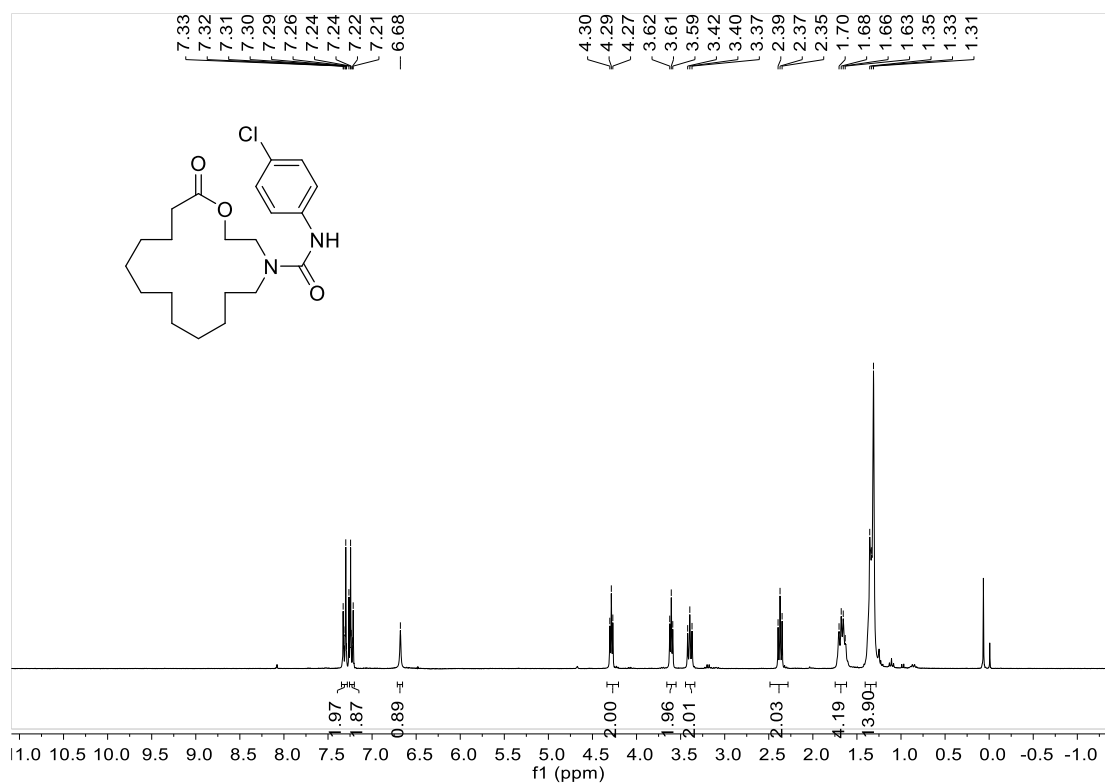

**<sup>13</sup>C NMR spectrum of D16-13 (75 MHz, CDCl<sub>3</sub>)**

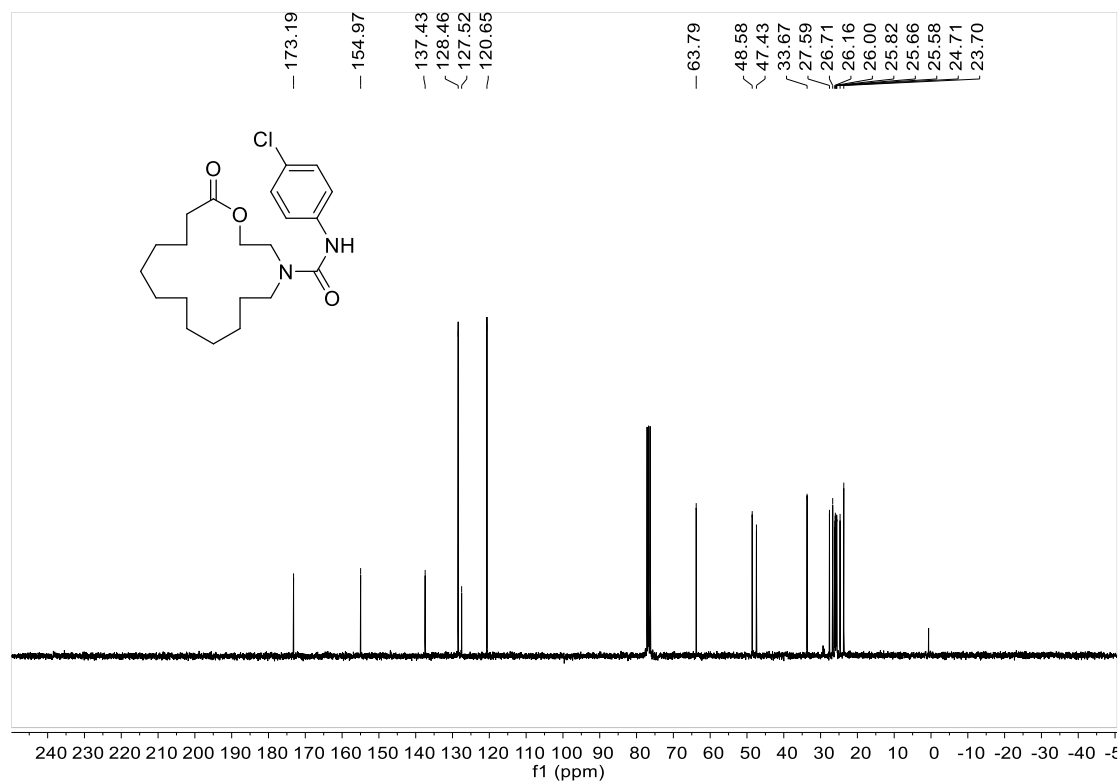

**<sup>1</sup>H NMR spectrum of D16-14 (300 MHz, CDCl<sub>3</sub>)**

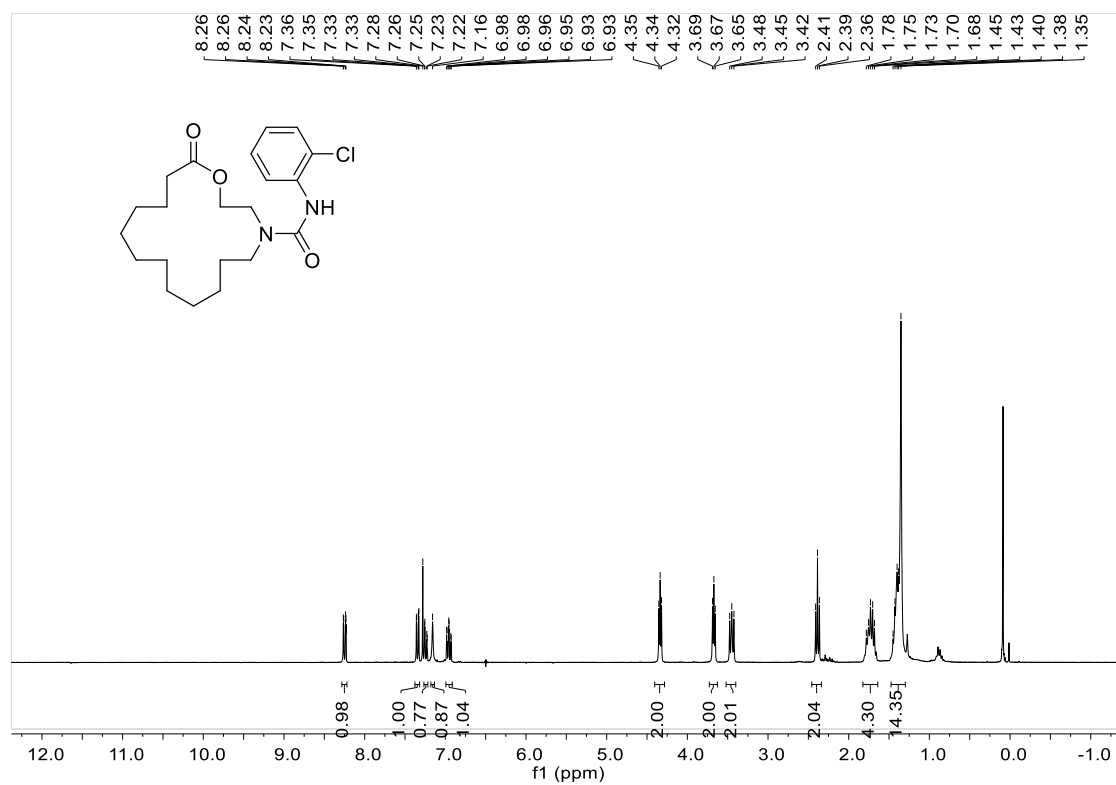

**<sup>13</sup>C NMR spectrum of D16-14 (75 MHz, CDCl<sub>3</sub>)**

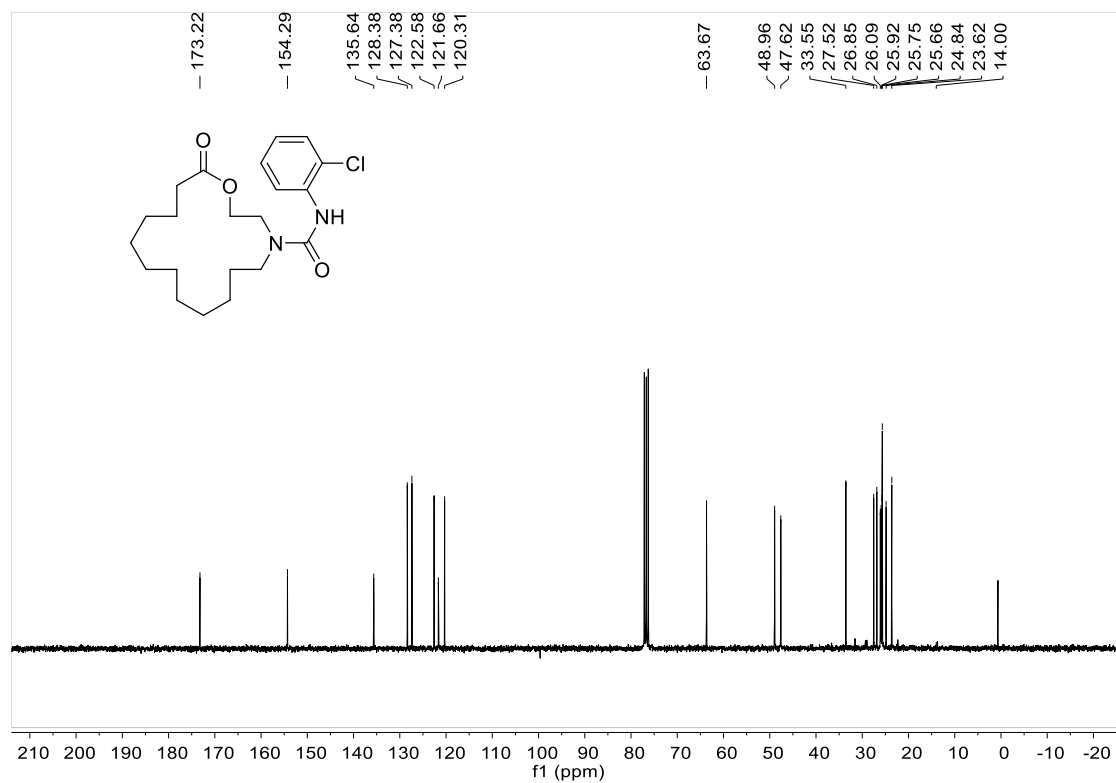



**<sup>1</sup>H NMR spectrum of D16-15 (300 MHz, CDCl<sub>3</sub>)**

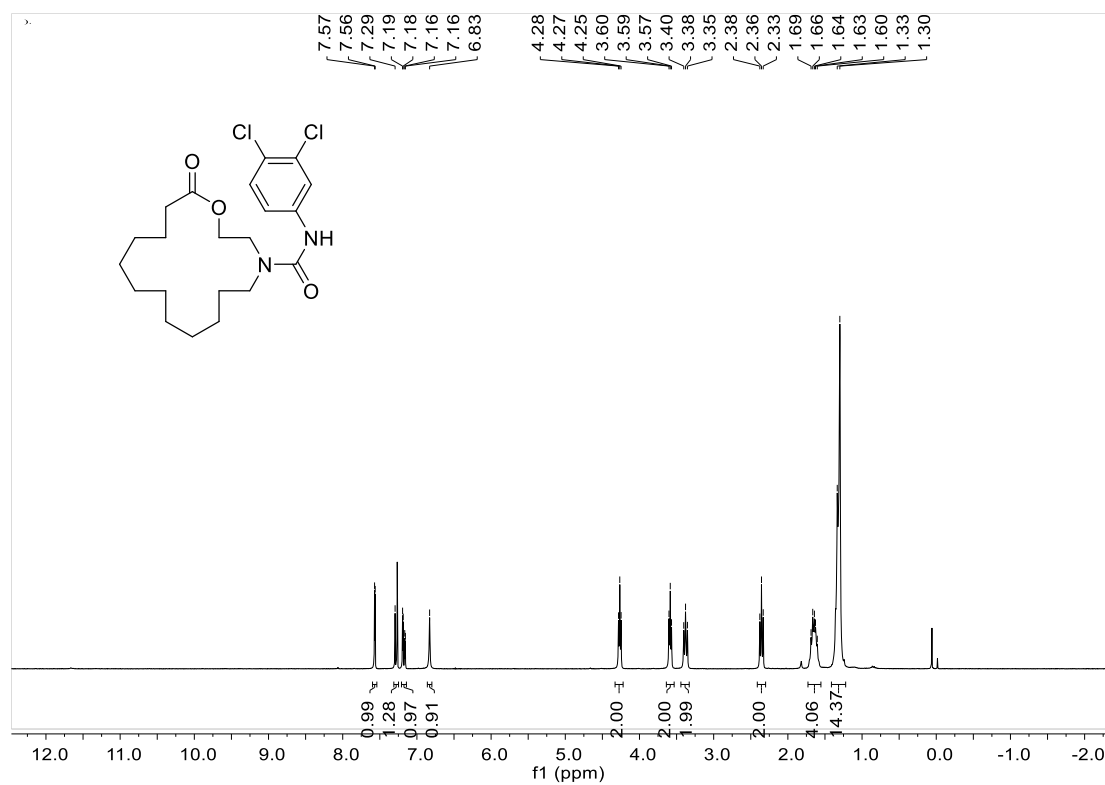

**<sup>13</sup>C NMR spectrum of D16-15 (75 MHz, CDCl<sub>3</sub>)**

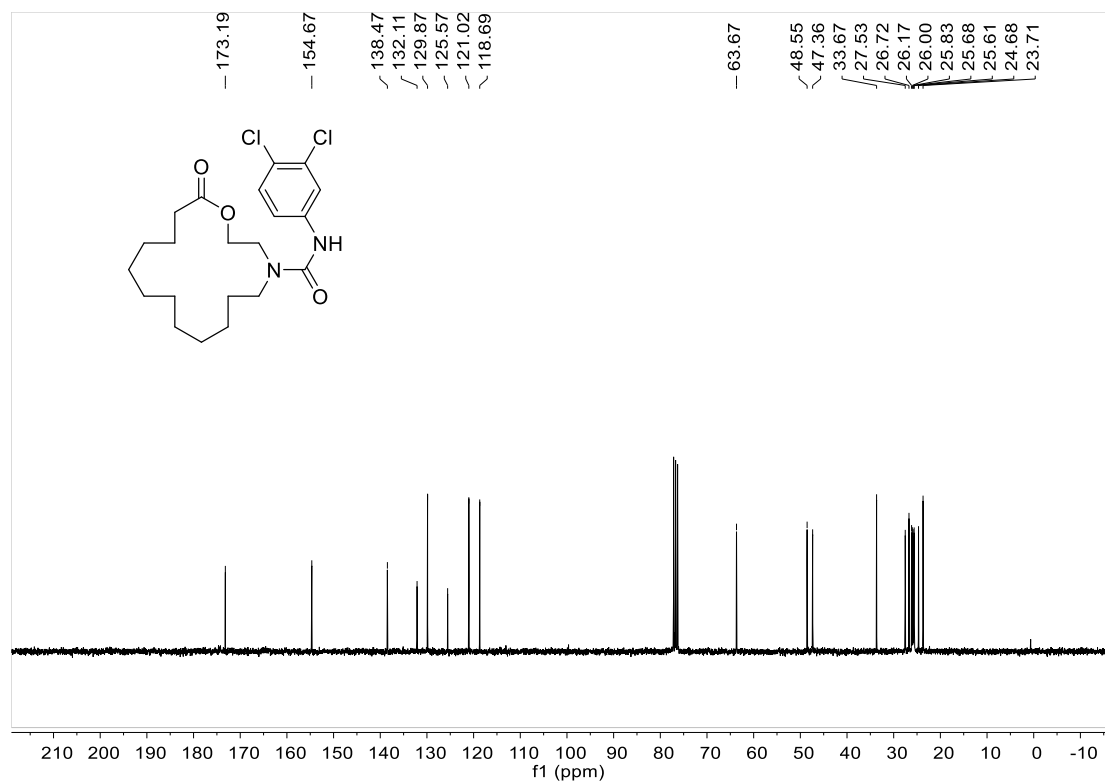

**<sup>1</sup>H NMR spectrum of D16-16 (300 MHz, CDCl<sub>3</sub>)**

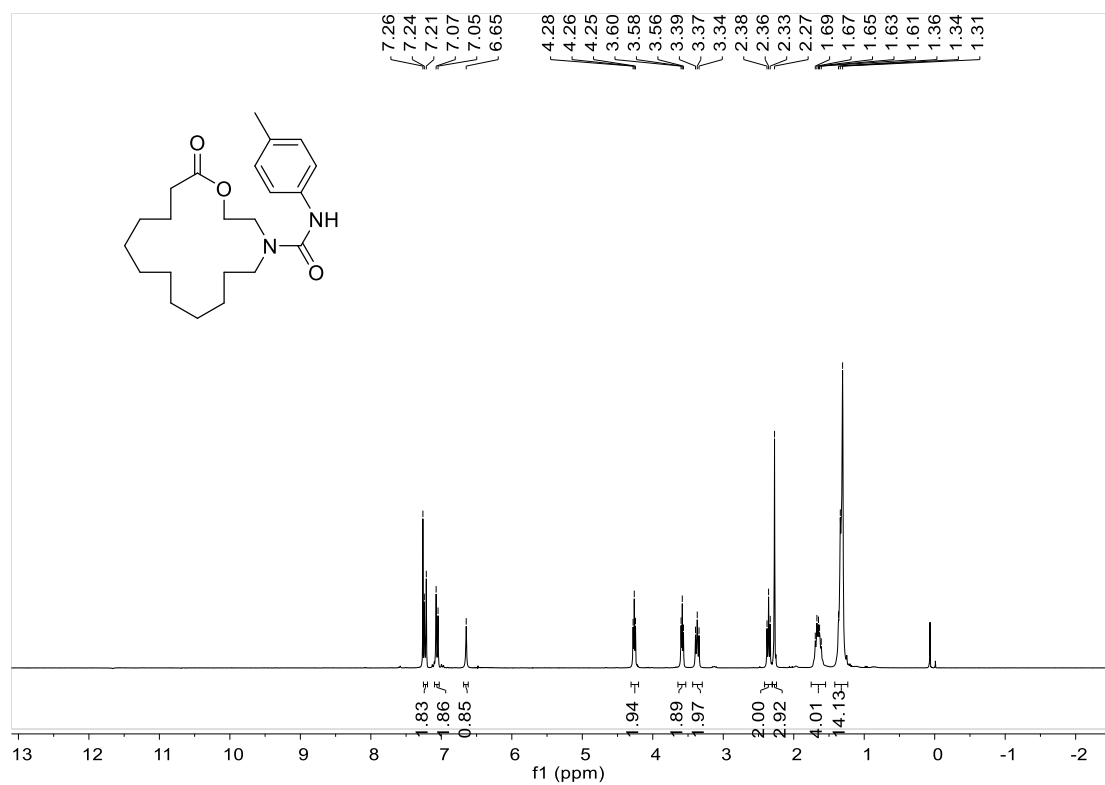

**<sup>13</sup>C NMR spectrum of D16-16 (75 MHz, CDCl<sub>3</sub>)**

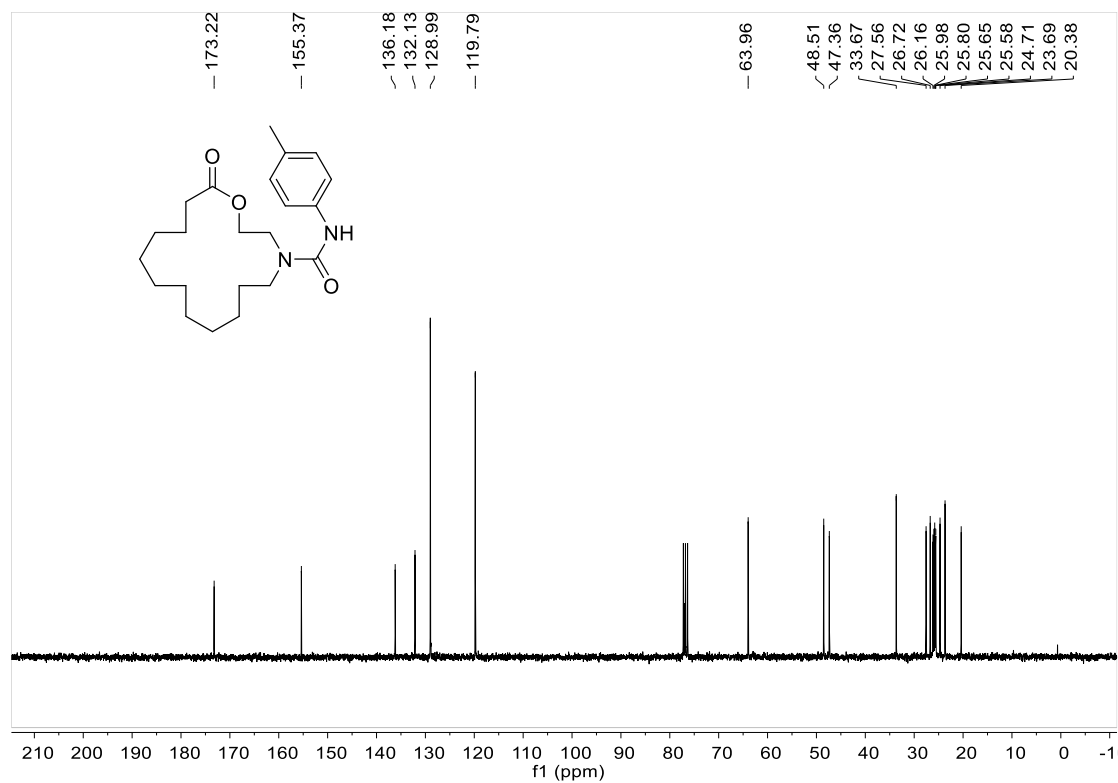

**<sup>1</sup>H NMR spectrum of D16-17 (300 MHz, CDCl<sub>3</sub>)**

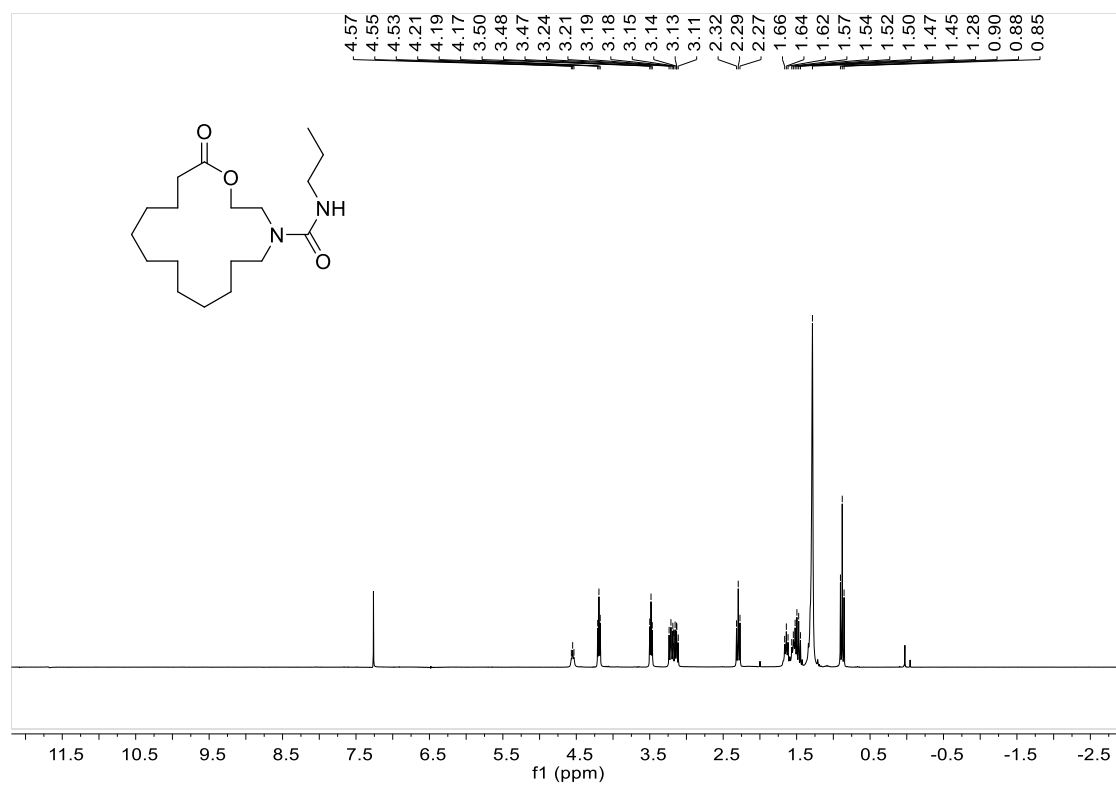

**<sup>13</sup>C NMR spectrum of D16-17 (75 MHz, CDCl<sub>3</sub>)**

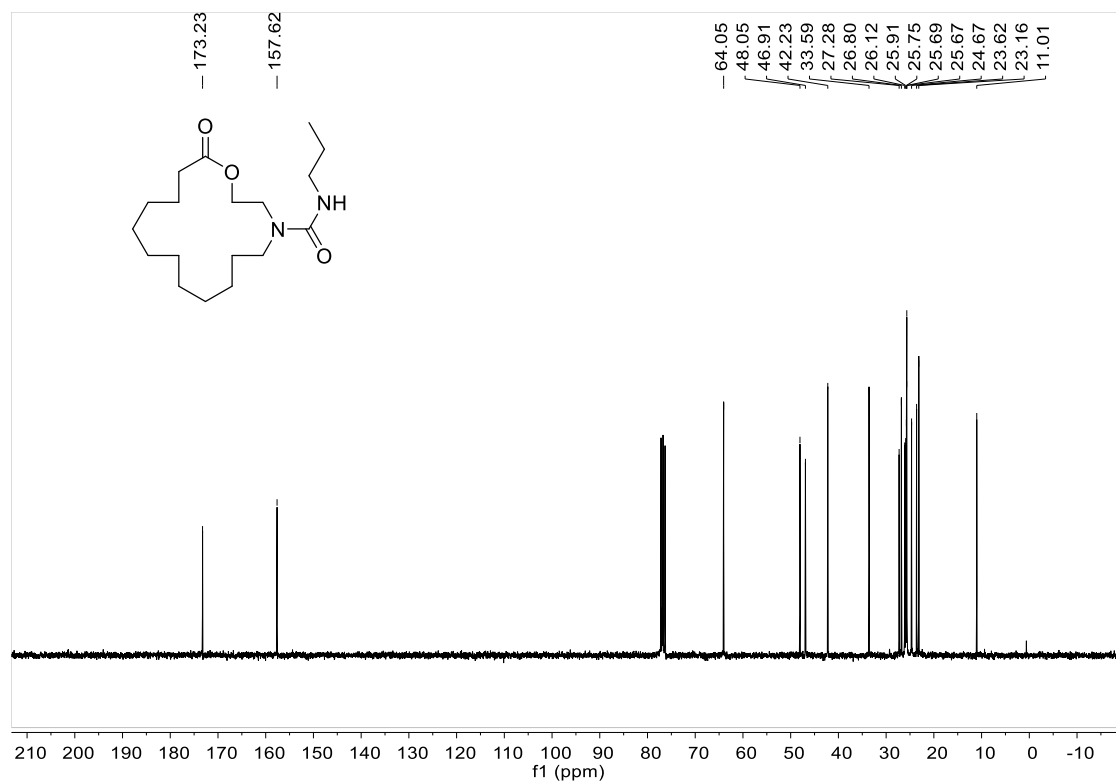

**<sup>1</sup>H NMR spectrum of D16-18 (300 MHz, CDCl<sub>3</sub>)**

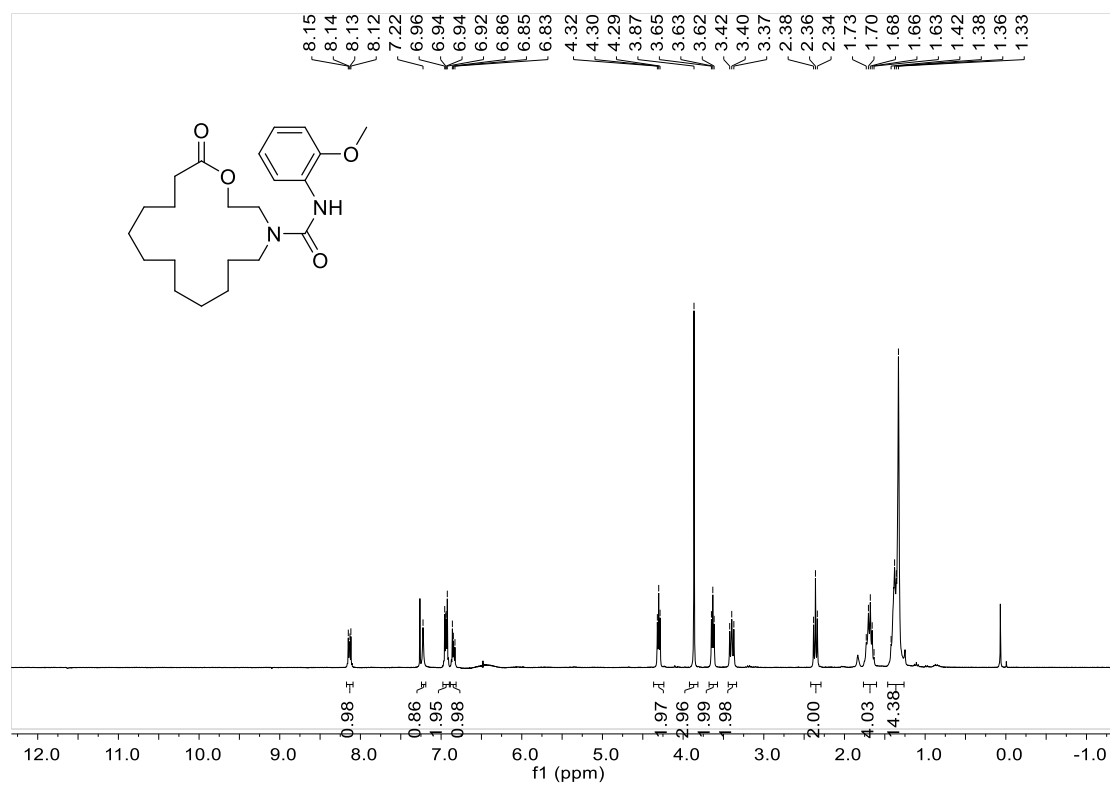

**<sup>13</sup>C NMR spectrum of D16-18 (75 MHz, CDCl<sub>3</sub>)**

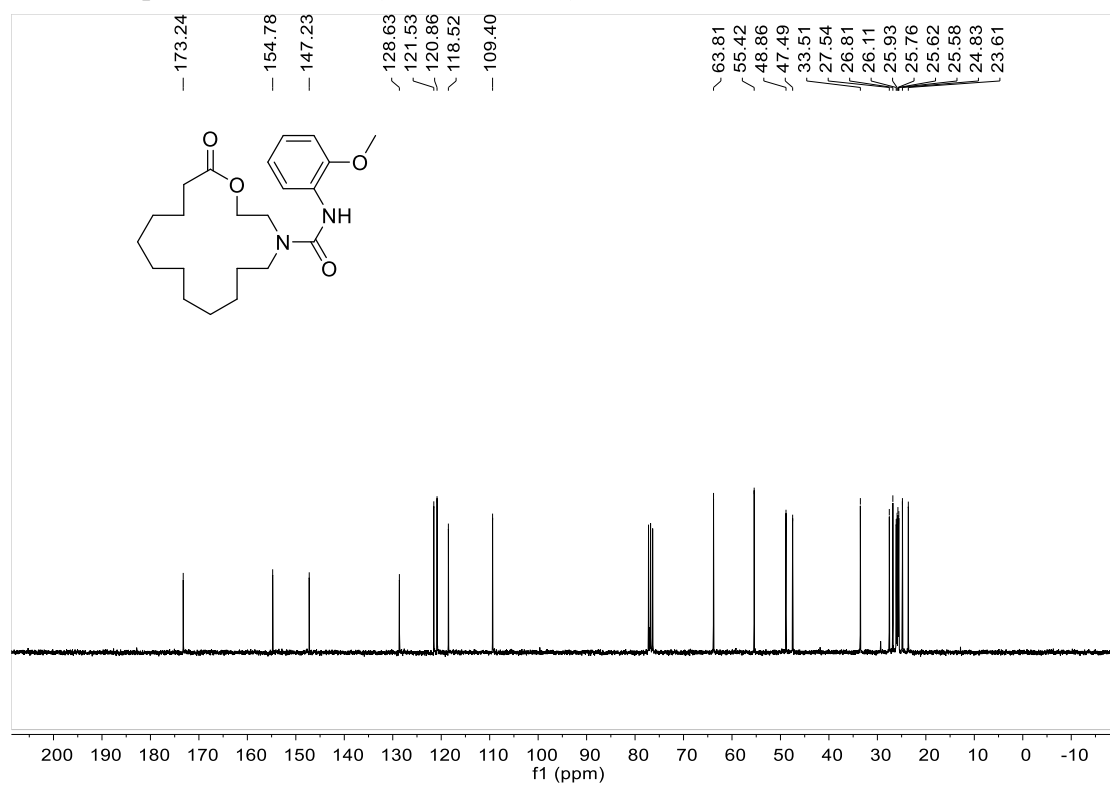

**<sup>1</sup>H NMR spectrum of D16-19 (300 MHz, CDCl<sub>3</sub>)**

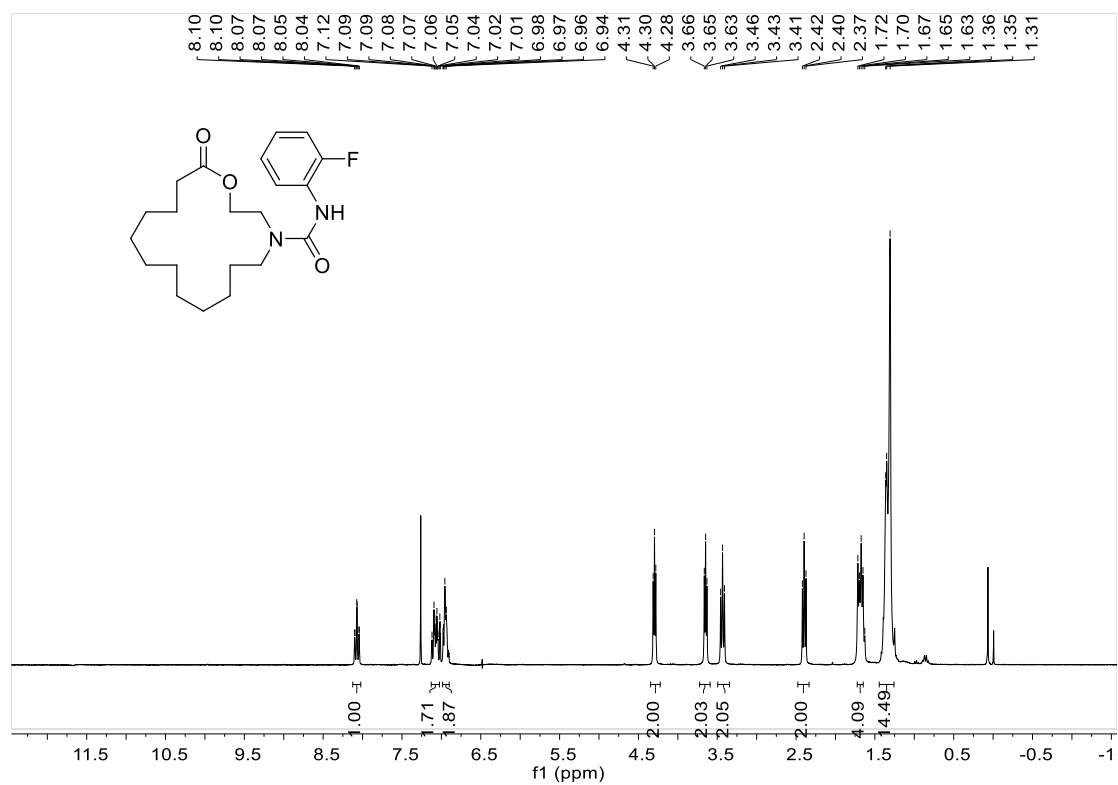

**<sup>13</sup>C NMR spectrum of D16-19 (75 MHz, CDCl<sub>3</sub>)**

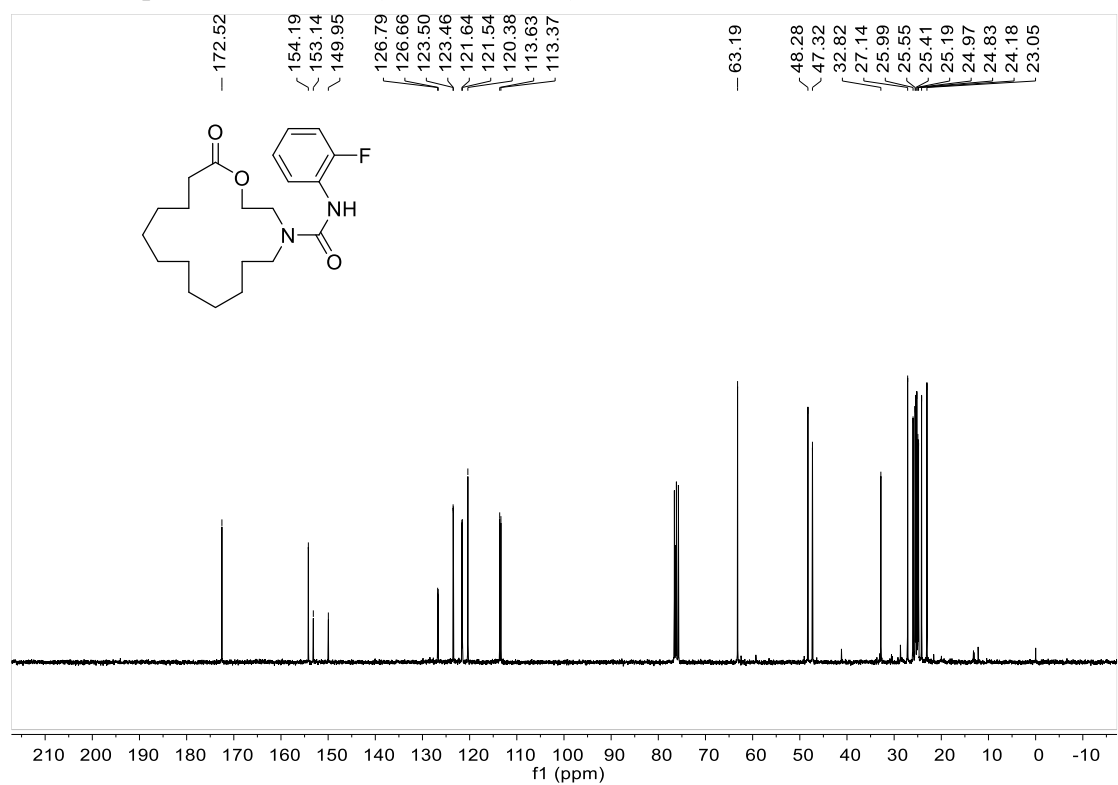

**<sup>1</sup>H NMR spectrum of D16-20 (300 MHz, CDCl<sub>3</sub>)**

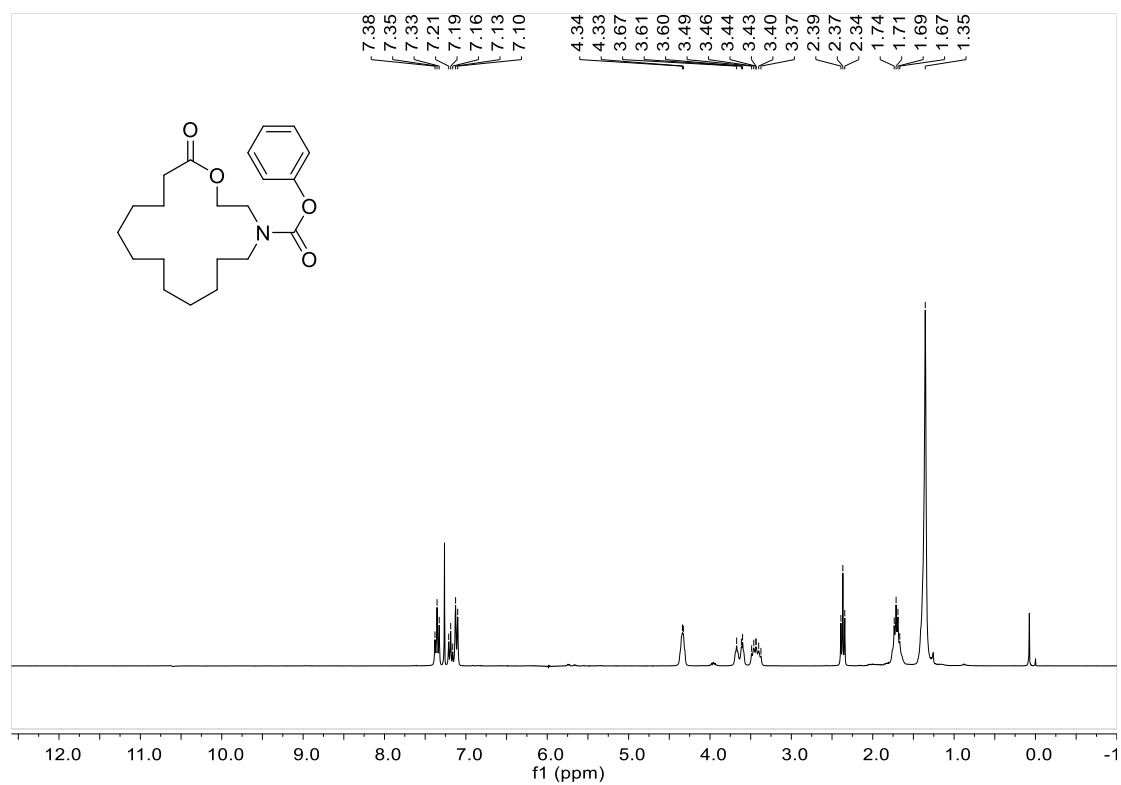

**<sup>13</sup>C NMR spectrum of D16-20 (75 MHz, CDCl<sub>3</sub>)**

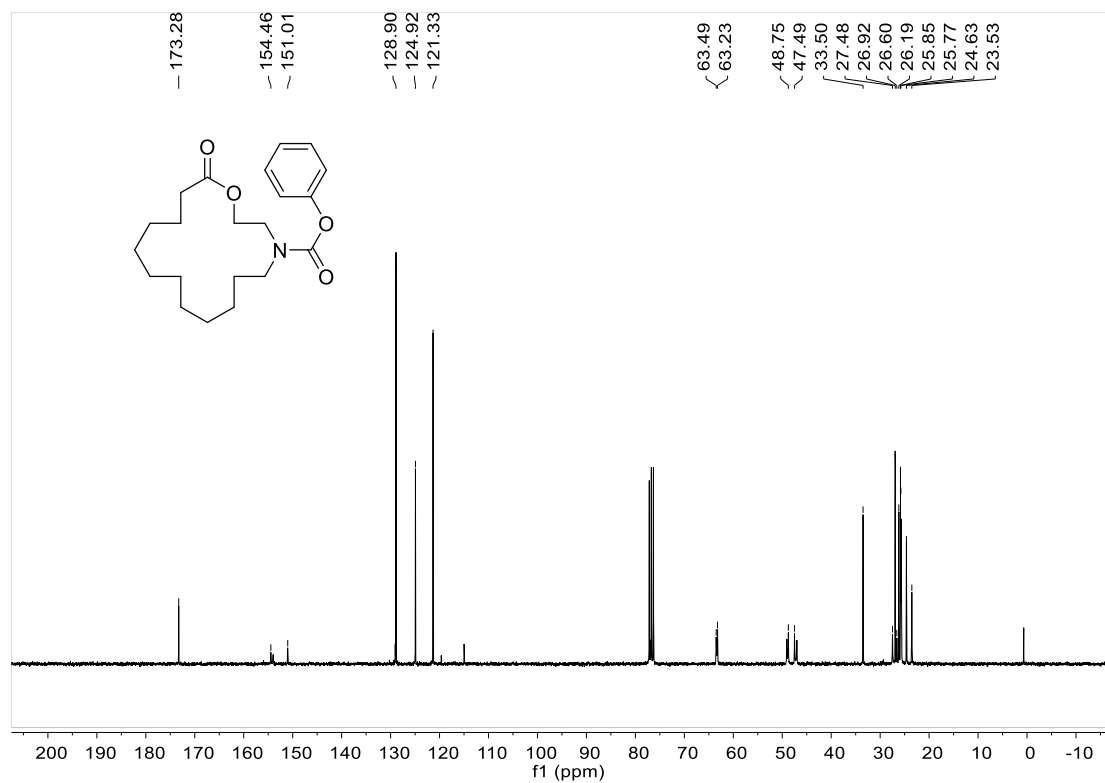

**<sup>1</sup>H NMR spectrum of D16-21 (300 MHz, CDCl<sub>3</sub>)**

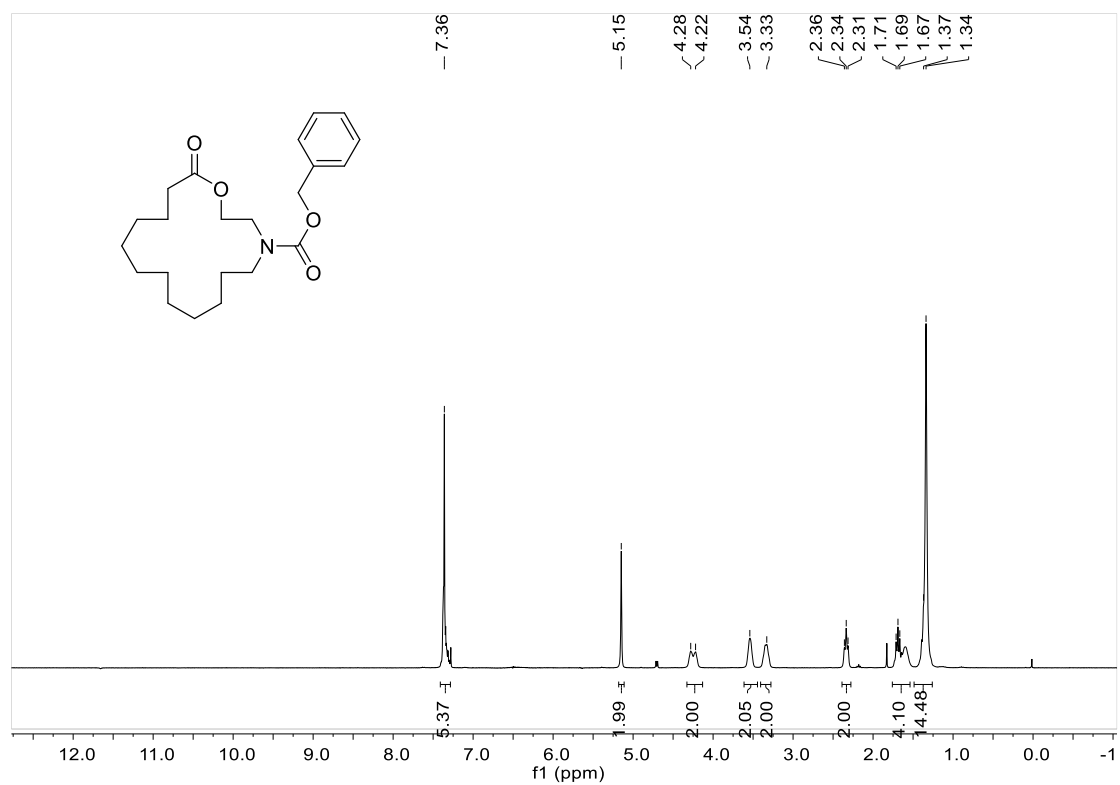

**<sup>13</sup>C NMR spectrum of D16-21 (75 MHz, CDCl<sub>3</sub>)**

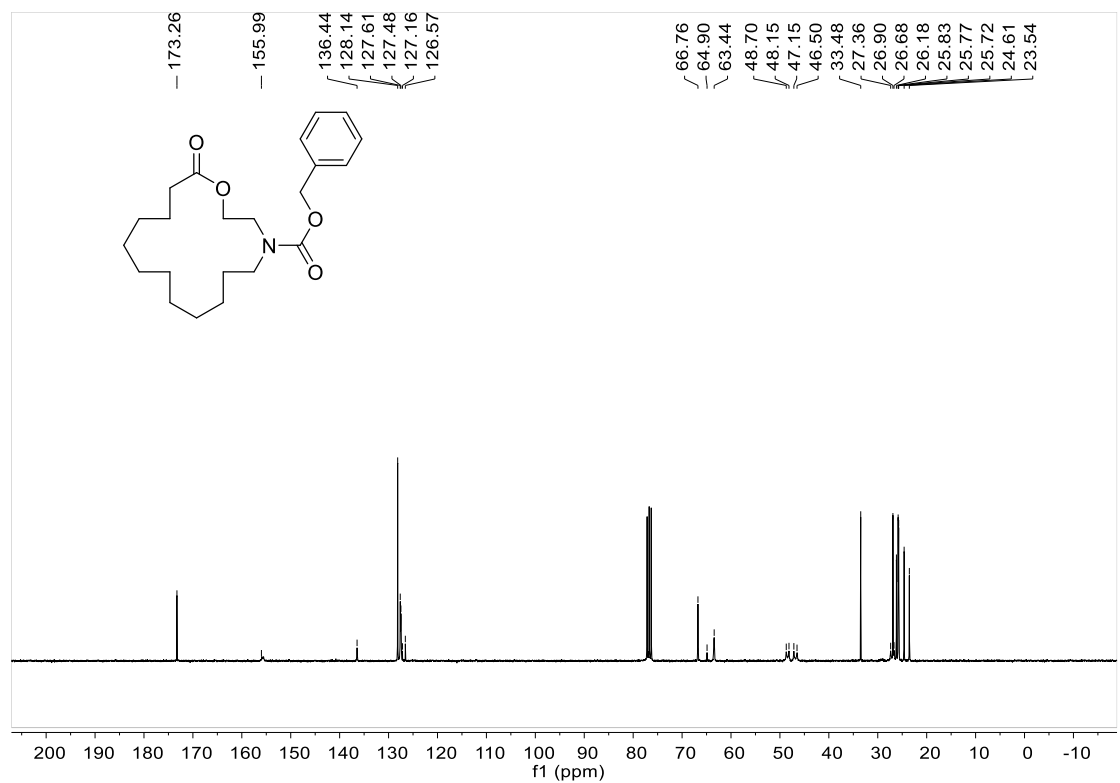

Supplement: d0nj05727d1.pdf [file d0nj05727d1.pdf]
